# Supplementary material for: N-Glycome Profile of the Spike Protein S1: Systemic and Comparative Analysis from Eleven Variants of SARS-CoV-2
Source: MDPI journal article supplement (doi:10.3390/biom13091421), 2023-09-20
Supplement: s1 [file s1]

**[Supplementary data]**

***N*-Glycome profile of the spike protein S1; systemic and comparative analysis  
from eleven variants of SARS-CoV-2**

Cristian D. Gutierrez Reyes<sup>1‡</sup>, Sherifdeen Onigbinde<sup>1‡</sup>, Akeem Sanni<sup>1</sup>, Andrew I. Bennett<sup>1</sup>, Oluwatosin Daramola<sup>1</sup>, Parisa Ahmadi<sup>1</sup>, Mojibola Fowowe<sup>1</sup>, Mojgan Atashi<sup>1</sup>, Peilin Jiang<sup>1</sup>, Vishal Sandilya<sup>1</sup>, Md Abdul Hakim<sup>1</sup>, and Yehia Mechref<sup>1\*</sup>

1. Department of Chemistry and Biochemistry, Texas Tech University, Lubbock, TX, USA.

‡ These authors contribute equally

\*Corresponding author

Department of Chemistry and Biochemistry

Texas Tech University

Lubbock, TX 79409-1061

Email: yehia.mechref@ttu.edu

Tel: 806-742-3059

Fax: 806-742-1289

## Table of Contents:

### Supplementary Figures:

**Supplementary Figure S1.** Protein percent coverage. SARS-CoV-2 Spike S1 protein variants: H12 Alpha, H15 Beta, H14 Gamma, H23 Delta, H17 Epsilon, H29 Eta, H28 Iota, H1B Kappa, H32 Lambda, H38 Mu, and H41 Omicron.

**Supplementary Figure S2.** Total *N*-glycan identifications and their relative abundance. SARS-CoV-2 S1 protein variants: H12 Alpha, H15 Beta, H14 Gamma, H23 Delta, H17 Epsilon, H29 Eta, H28 Iota, H1B Kappa, H32 Lambda, H38 Mu, and H41 Omicron.

**Supplementary Figure S3.** Bar plots of the total *N*-glycan abundance (peak area). SARS-CoV-2 S1 protein variants: H12 Alpha, H15 Beta, H14 Gamma, H23 Delta, H17 Epsilon, H29 Eta, H28 Iota, H1B Kappa, H32 Lambda, H38 Mu, and H41 Omicron.

**Supplementary Figure S4.** Principal Component Analysis (PCA) of the *N*-glycan relative abundance considering the observed isomeric structures. SARS-CoV-2 S1 protein variants: H12 Alpha, H15 Beta, H14 Gamma, H23 Delta, H17 Epsilon, H29 Eta, H28 Iota, H1B Kappa, H32 Lambda, H38 Mu, and H41 Omicron.

**Supplementary Figure S5.** Bar graphs of the relative abundance by type of *N*-glycans across the SARS-CoV-2 S1 protein variants: H12, H14, H15, H17, H23, H28, H29, H32, H38, H41, and H1B. a) fucosylated, b) sialylated, c) sialofucosylated, d) high mannose, and e) other *N*-glycan types.

**Supplementary Figure S6.** Bar plot comparison of the relative abundance of **a)** mono-sialylated, **b)** tri-sialylated, **c)** di-sialylated, and **d)** and tetra-sialylated *N*-glycan types. SARS-CoV-2 S1 protein variants: H12 Alpha, H15 Beta, H14 Gamma, H23 Delta, H17 Epsilon, H29 Eta, H28 Iota, H1B Kappa, H32 Lambda, H38 Mu, and H41 Omicron.

**Supplementary Figure S7.** Heat maps of the relative abundance of **a)** mono-sialylated, **b)** di-sialylated, **c)** tri-sialylated, and **d)** tetra-sialylated *N*-glycan types. SARS-CoV-2 S1 protein variants: H12 Alpha, H15 Beta, H14 Gamma, H23 Delta, H17 Epsilon, H29 Eta, H28 Iota, H1B Kappa, H32 Lambda, H38 Mu, and H41 Omicron. The glycan nomenclature is described in **Figure 1** of the main manuscript.

**Supplementary Figure S8.** Top ten *N*-glycans, relative abundance. SARS-CoV-2 S1 protein variants of interest: H17 Epsilon, H29 Eta, H28 Iota, H1B Kappa, H32 Lambda, and H38 Mu. The glycan nomenclature is described in **Figure 1** of the main manuscript.

**Supplementary Figure S9.** Extracted ion chromatograms (EICs) showing the isomeric expressions of the *N*-glycans **a)** GlcNAc<sub>4</sub>, Hex<sub>5</sub>, Fuc, NeuAc; **b)** GlcNAc<sub>5</sub>, Hex<sub>6</sub>, Fuc, NeuAc; and **c)** GlcNAc<sub>4</sub>, Hex<sub>5</sub>, Fuc, Neu5Ac<sub>2</sub> across the analyzed SARS-CoV2 S1 protein variants (H12 Alpha, H15 Beta, H14 Gamma, H23 Delta, H17 Epsilon, H29 Eta, H28 Iota, H1B Kappa, H32 Lambda, H38 Mu, and H41 Omicron). The stars (\*) show the identified isoforms and the *N*-glycan nomenclature is described in **Figure 1** of the main manuscript.

## **Supplementary Tables:**

**Supplementary Table S1.** Relative abundance of the identified *N*-glycans. A four-digit *N*-glycan nomenclature was used in the following order: *N*-acetylglucosamine, Hexose, Fucose, *N*-acetylneuraminic acid (GlcNAc,Hex,Fuc,NeuAc). ND = Not detected.

**Supplementary Table S2.** Relative standard deviation (%RSD) of the relative abundance of the identified *N*-glycans. A four-digit *N*-glycan nomenclature was used in the following order: *N*-acetylglucosamine, Hexose, Fucose, *N*-acetylneuraminic acid (GlcNAc,Hex,Fuc,NeuAc).

**Supplementary Table S3.** Relative abundance of the identified isomeric *N*-glycans. A four-digit *N*-glycan nomenclature was used in the following order: *N*-acetylglucosamine, Hexose, Fucose, *N*-acetylneuraminic acid (GlcNAc,Hex,Fuc,NeuAc), and I = isomer.

## Supplementary Figure S1

**Supplementary Figure S1.** Protein percent coverage. SARS-CoV-2 Spike S1 protein variants: H12 Alpha, H15 Beta, H14 Gamma, H23 Delta, H17 Epsilon, H29 Eta, H28 Iota, H1B Kappa, H32 Lambda, H38 Mu, and H41 Omicron.

|         |     |            |            |            |            |            |             |            |            |            |            |     |
|---------|-----|------------|------------|------------|------------|------------|-------------|------------|------------|------------|------------|-----|
| Alpha   | 1   | MFVFLVLLPL | VSSQCVNLT  | RTQLPPAYTN | SFTRGVVYPD | KVFRSSVLHS | TQDLFLPFFS  | NVTWFHAI-- | SGTNGTKRFD | NPVLPPNDGV | YFASTEKSN  | 100 |
| Beta    |     | MFVFLVLLPL | VSSQCVNFT  | RTQLPPAYTN | SFTRGVVYPD | KVFRSSVLHS | TQDLFLPFFS  | NVTWFHAIHV | SGTNGTKRFA | NPVLPPNDGV | YFASTEKSN  |     |
| Gamma   |     | MFVFLVLLPL | VSSQCVNFTN | RTQLPSAYTN | SFTRGVVYPD | KVFRSSVLHS | TQDLFLPFFS  | NVTWFHAIHV | SGTNGTKRFD | NPVLPPNDGV | YFASTEKSN  |     |
| Delta   |     | MFVFLVLLPL | VSSQCVNLT  | RTQLPPAYTN | SFTRGVVYPD | KVFRSSVLHS | TQDLFLPFFS  | NVTWFHAIHV | SGTNGTKRFD | NPVLPPNDGV | YFASTEKSN  |     |
| Epsilon |     | MFVFLVLLPL | VSSQCVNLT  | RTQLPPAYTN | SFTRGVVYPD | KVFRSSVLHS | TQDLFLPFFS  | NVTWFHAIHV | SGTNGTKRFD | NPVLPPNDGV | YFASTEKSN  |     |
| Kappa   |     | MFVFLVLLPL | VSSQCVNLT  | RTQLPPAYTN | SFTRGVVYPD | KVFRSSVLHS | TQDLFLPFFS  | NVTWFHAIHV | SGTNGTKRFD | NPVLPPNDGV | YFASTEKSN  |     |
| Iota    |     | MFVFLVLLPL | VSSQCVNLT  | RTQLPPAYTN | SFTRGVVYPD | KVFRSSVLHS | TQDLFLPFFS  | NVTWFHAIHV | SGTNGTKRFD | NPVLPPNDGV | YFASTEKSN  |     |
| Eta     |     | MFVFLVLLPL | VSSQCVNLT  | RTQLPPAYTN | SFTRGVVYPD | KVFRSSVLHS | TQDLFLPFFS  | NVTWFHVI-- | SGTNGTKRFD | NPVLPPNDGV | YFASTEKSN  |     |
| Lambda  |     | MFVFLVLLPL | VSSQCVNLT  | RTQLPPAYTN | SFTRGVVYPD | KVFRSSVLHS | TQDLFLPFFS  | NVTWFHAIHV | SGTNVTKRFD | NPVLPPNDGV | YFASTEKSN  |     |
| Mu      |     | MFVFLVLLPL | VSSQCVNLT  | RTQLPPAYTN | SFTRGVVYPD | KVFRSSVLHS | TQDLFLPFFS  | NVTWFHAIHV | SGTNGTKRFD | NPVLPPNDGV | YFASTEKSN  |     |
| Omicron |     | MFVFLVLLPL | VSSQCVNLT  | RTQLPPAYTN | SFTRGVVYPD | KVFRSSVLHS | TQDLFLPFFS  | NVTWFHVI-- | SGTNGTKRFD | NPVLPPNDGV | YFASTEKSN  |     |
| Alpha   | 101 | IRGWIFGTTL | GSKTQSLIV  | NNATNVVIVK | CEQFCNDPF  | LGV-YHKNNK | SWMESEFRVY  | SSANNCTFEY | VSQPFMLDLE | GKQGNFKNLR | EFVFNKIDGY | 200 |
| Beta    |     | IRGWIFGTTL | GSKTQSLIV  | NNATNVVIVK | CEQFCNDPF  | LGVIYHKNNK | SWMESEFRVY  | SSANNCTFEY | VSQPFMLDLE | GKQGNFKNLR | EFVFNKIDGY |     |
| Gamma   |     | IRGWIFGTTL | GSKTQSLIV  | NNATNVVIVK | CEQFCNVYP  | LGVIYHKNNK | SWMESEFRVY  | SSANNCTFEY | VSQPFMLDLE | GKQGNFKNLR | EFVFNKIDGY |     |
| Delta   |     | IRGWIFGTTL | GSKTQSLIV  | NNATNVVIVK | CEQFCNDPF  | LDVIYHKNNK | SWMESEFRVY  | SSANNCTFEY | VSQPFMLDLE | GKQGNFKNLR | EFVFNKIDGY |     |
| Epsilon |     | IRGWIFGTTL | GSKTQSLIV  | NNATNVVIVK | CEQFCNDPF  | LDVIYHKNNK | SWMESEFRVY  | SSANNCTFEY | VSQPFMLDLE | GKQGNFKNLR | EFVFNKIDGY |     |
| Kappa   |     | IRGWIFGTTL | GSKTQSLIV  | NNATNVVIVK | CEQFCNDPF  | LDVIYHKNNK | SWMESEFRVY  | SSANNCTFEY | VSQPFMLDLE | GKQGNFKNLR | EFVFNKIDGY |     |
| Iota    |     | IRGWIFGTTL | GSKTQSLIV  | NNATNVVIVK | CEQFCNDPF  | LDVIYHKNNK | SWMESEFRVY  | SSANNCTFEY | VSQPFMLDLE | GKQGNFKNLR | EFVFNKIDGY |     |
| Eta     |     | IRGWIFGTTL | GSKTQSLIV  | NNATNVVIVK | CEQFCNDPF  | LGV-YHKNNK | SWMESEFRVY  | SSANNCTFEY | VSQPFMLDLE | GKQGNFKNLR | EFVFNKIDGY |     |
| Lambda  |     | IRGWIFGTTL | GSKTQSLIV  | NNATNVVIVK | CEQFCNDPF  | LGVIYHKNNK | SWMESEFRVY  | SSANNCTFEY | VSQPFMLDLE | GKQGNFKNLR | EFVFNKIDGY |     |
| Mu      |     | IRGWIFGTTL | GSKTQSLIV  | NNATNVVIVK | CEQFCNDPF  | LDVIYHKNNK | SWMESEFRVY  | SSANNCTFEY | VSQPFMLDLE | GKQGNFKNLR | EFVFNKIDGY |     |
| Omicron |     | IRGWIFGTTL | GSKTQSLIV  | NNATNVVIVK | CEQFCNDPF  | LDVIYHKNNK | SWMESEFRVY  | SSANNCTFEY | VSQPFMLDLE | GKQGNFKNLR | EFVFNKIDGY |     |
| Alpha   | 201 | FKIYSKHTPI | NLVRDLPGQF | SALEPLVDLP | IGINITRFQT | LLALHRSYLT | PGDSSSGWTA  | GAAAYYVGYL | QPRTFLLKYN | ENGITIDAVD | CALDPLSETK | 300 |
| Beta    |     | FKIYSKHTPI | NLVRGLPGQF | SALEPLVDLP | IGINITRFQT | L--HISYLT  | PGDSSSGWTA  | GAAAYYVGYL | QPRTFLLKYN | ENGITIDAVD | CALDPLSETK |     |
| Gamma   |     | FKIYSKHTPI | NLVRDLPGQF | SALEPLVDLP | IGINITRFQT | LLALHRSYLT | PGDSSSGWTA  | GAAAYYVGYL | QPRTFLLKYN | ENGITIDAVD | CALDPLSETK |     |
| Delta   |     | FKIYSKHTPI | NLVRDLPGQF | SALEPLVDLP | IGINITRFQT | LLALHRSYLT | PGDSSSGWTA  | GAAAYYVGYL | QPRTFLLKYN | ENGITIDAVD | CALDPLSETK |     |
| Epsilon |     | FKIYSKHTPI | NLVRDLPGQF | SALEPLVDLP | IGINITRFQT | LLALHRSYLT | PGDSSSGWTA  | GAAAYYVGYL | QPRTFLLKYN | ENGITIDAVD | CALDPLSETK |     |
| Kappa   |     | FKIYSKHTPI | NLVRDLPGQF | SALEPLVDLP | IGINITRFQT | LLALHRSYLT | PGDSSSGWTA  | GAAAYYVGYL | QPRTFLLKYN | ENGITIDAVD | CALDPLSETK |     |
| Iota    |     | FKIYSKHTPI | NLVRDLPGQF | SALEPLVDLP | IGINITRFQT | LLALHRSYLT | PGDSSSGWTA  | GAAAYYVGYL | QPRTFLLKYN | ENGITIDAVD | CALDPLSETK |     |
| Eta     |     | FKIYSKHTPI | NLVRDLPGQF | SALEPLVDLP | IGINITRFQT | LLALHRSYLT | PGDSSSGWTA  | GAAAYYVGYL | QPRTFLLKYN | ENGITIDAVD | CALDPLSETK |     |
| Lambda  |     | FKIYSKHTPI | NLVRDLPGQF | SALEPLVDLP | IGINITRFQT | LLALHRSYLT | PGDSSSGWTA  | GAAAYYVGYL | QPRTFLLKYN | ENGITIDAVD | CALDPLSETK |     |
| Mu      |     | FKIYSKHTPI | NLVRDLPGQF | SALEPLVDLP | IGINITRFQT | LLALHRSYLT | PGDSSSGWTA  | GAAAYYVGYL | QPRTFLLKYN | ENGITIDAVD | CALDPLSETK |     |
| Omicron |     | FKIYSKHTPI | NLVRDLPGQF | SALEPLVDLP | IGINITRFQT | LLALHRSYLT | PGDSSSGWTA  | GAAAYYVGYL | QPRTFLLKYN | ENGITIDAVD | CALDPLSETK |     |
| Alpha   | 301 | CTLKSFTVEK | GIYQTSNFRV | OPTESIVRFP | NITNLCPPGE | VFNATRFASV | YAWNKRKRISN | CVADYSVLN  | SASFSTFKCY | GVSPTKLNDL | CFTNVYADSF | 400 |
| Beta    |     | CTLKSFTVEK | GIYQTSNFRV | OPTESIVRFP | NITNLCPPGE | VFNATRFASV | YAWNKRKRISN | CVADYSVLN  | SASFSTFKCY | GVSPTKLNDL | CFTNVYADSF |     |
| Gamma   |     | CTLKSFTVEK | GIYQTSNFRV | OPTESIVRFP | NITNLCPPGE | VFNATRFASV | YAWNKRKRISN | CVADYSVLN  | SASFSTFKCY | GVSPTKLNDL | CFTNVYADSF |     |
| Delta   |     | CTLKSFTVEK | GIYQTSNFRV | OPTESIVRFP | NITNLCPPGE | VFNATRFASV | YAWNKRKRISN | CVADYSVLN  | SASFSTFKCY | GVSPTKLNDL | CFTNVYADSF |     |
| Epsilon |     | CTLKSFTVEK | GIYQTSNFRV | OPTESIVRFP | NITNLCPPGE | VFNATRFASV | YAWNKRKRISN | CVADYSVLN  | SASFSTFKCY | GVSPTKLNDL | CFTNVYADSF |     |
| Kappa   |     | CTLKSFTVEK | GIYQTSNFRV | OPTESIVRFP | NITNLCPPGE | VFNATRFASV | YAWNKRKRISN | CVADYSVLN  | SASFSTFKCY | GVSPTKLNDL | CFTNVYADSF |     |
| Iota    |     | CTLKSFTVEK | GIYQTSNFRV | OPTESIVRFP | NITNLCPPGE | VFNATRFASV | YAWNKRKRISN | CVADYSVLN  | SASFSTFKCY | GVSPTKLNDL | CFTNVYADSF |     |
| Eta     |     | CTLKSFTVEK | GIYQTSNFRV | OPTESIVRFP | NITNLCPPGE | VFNATRFASV | YAWNKRKRISN | CVADYSVLN  | SASFSTFKCY | GVSPTKLNDL | CFTNVYADSF |     |
| Lambda  |     | CTLKSFTVEK | GIYQTSNFRV | OPTESIVRFP | NITNLCPPGE | VFNATRFASV | YAWNKRKRISN | CVADYSVLN  | SASFSTFKCY | GVSPTKLNDL | CFTNVYADSF |     |
| Mu      |     | CTLKSFTVEK | GIYQTSNFRV | OPTESIVRFP | NITNLCPPGE | VFNATRFASV | YAWNKRKRISN | CVADYSVLN  | SASFSTFKCY | GVSPTKLNDL | CFTNVYADSF |     |
| Omicron |     | CTLKSFTVEK | GIYQTSNFRV | OPTESIVRFP | NITNLCPPGE | VFNATRFASV | YAWNKRKRISN | CVADYSVLN  | LAPFSTFKCY | GVSPTKLNDL | CFTNVYADSF |     |
| Alpha   | 401 | VIRGDEVQR  | APGQTGKIAD | YNYKLPDDFT | GCVIAWNSNN | LDSKVGNNYN | YLRLFRKSN   | LKPPERDIST | EIYQAGSTPC | NGVEGFNCYF | PLQSYGFQPT | 500 |
| Beta    |     | VIRGDEVQR  | APGQTGNIAD | YNYKLPDDFT | GCVIAWNSNN | LDSKVGNNYN | YLRLFRKSN   | LKPPERDIST | EIYQAGSTPC | NGVKGPNCFY | PLQSYGFQPT |     |
| Gamma   |     | VIRGDEVQR  | APGQTGKIAD | YNYKLPDDFT | GCVIAWNSNN | LDSKVGNNYN | YLRLFRKSN   | LKPPERDIST | EIYQAGSTPC | NGVKGPNCFY | PLQSYGFQPT |     |
| Delta   |     | VIRGDEVQR  | APGQTGKIAD | YNYKLPDDFT | GCVIAWNSNN | LDSKVGNNYN | YRLFRKSN    | LKPPERDIST | EIYQAGSTPC | NGVEGFNCYF | PLQSYGFQPT |     |
| Epsilon |     | VIRGDEVQR  | APGQTGKIAD | YNYKLPDDFT | GCVIAWNSNN | LDSKVGNNYN | YLRLFRKSN   | LKPPERDIST | EIYQAGSTPC | NGVEGFNCYF | PLQSYGFQPT |     |
| Kappa   |     | VIRGDEVQR  | APGQTGKIAD | YNYKLPDDFT | GCVIAWNSNN | LDSKVGNNYN | YRLFRKSN    | LKPPERDIST | EIYQAGSTPC | NGVKGPNCFY | PLQSYGFQPT |     |
| Iota    |     | VIRGDEVQR  | APGQTGKIAD | YNYKLPDDFT | GCVIAWNSNN | LDSKVGNNYN | YLRLFRKSN   | LKPPERDIST | EIYQAGSTPC | NGVKGPNCFY | PLQSYGFQPT |     |
| Eta     |     | VIRGDEVQR  | APGQTGKIAD | YNYKLPDDFT | GCVIAWNSNN | LDSKVGNNYN | YLRLFRKSN   | LKPPERDIST | EIYQAGSTPC | NGVKGPNCFY | PLQSYGFQPT |     |
| Lambda  |     | VIRGDEVQR  | APGQTGKIAD | YNYKLPDDFT | GCVIAWNSNN | LDSKVGNNYN | YRLFRKSN    | LKPPERDIST | EIYQAGSTPC | NGVEGFNCYF | PLQSYGFQPT |     |
| Mu      |     | VIRGDEVQR  | APGQTGKIAD | YNYKLPDDFT | GCVIAWNSNN | LDSKVGNNYN | YLRLFRKSN   | LKPPERDIST | EIYQAGSTPC | NGVKGPNCFY | PLQSYGFQPT |     |
| Omicron |     | VIRGDEVQR  | APGQTGNIAD | YNYKLPDDFT | GCVIAWNSN  | LDSKVGNNYN | YLRLFRKSN   | LKPPERDIST | EIYQAGNKP  | NGVAGPNCFY | PLRSYGFQPT |     |
| Alpha   | 501 | YGVGYQPYRV | VVLSFELLHA | PATVCGPKKS | TNLVKNKCVN | PNFNGLTGTG | VLTESNKKFL  | PFQQFGRDIA | DTTDAVRDPQ | TLEILDITPC | SFGGVSVITP | 600 |
| Beta    |     | YGVGYQPYRV | VVLSFELLHA | PATVCGPKKS | TNLVKNKCVN | PNFNGLTGTG | VLTESNKKFL  | PFQQFGRDIA | DTTDAVRDPQ | TLEILDITPC | SFGGVSVITP |     |
| Gamma   |     | YGVGYQPYRV | VVLSFELLHA | PATVCGPKKS | TNLVKNKCVN | PNFNGLTGTG | VLTESNKKFL  | PFQQFGRDIA | DTTDAVRDPQ | TLEILDITPC | SFGGVSVITP |     |
| Delta   |     | YGVGYQPYRV | VVLSFELLHA | PATVCGPKKS | TNLVKNKCVN | PNFNGLTGTG | VLTESNKKFL  | PFQQFGRDIA | DTTDAVRDPQ | TLEILDITPC | SFGGVSVITP |     |
| Epsilon |     | YGVGYQPYRV | VVLSFELLHA | PATVCGPKKS | TNLVKNKCVN | PNFNGLTGTG | VLTESNKKFL  | PFQQFGRDIA | DTTDAVRDPQ | TLEILDITPC | SFGGVSVITP |     |
| Kappa   |     | YGVGYQPYRV | VVLSFELLHA | PATVCGPKKS | TNLVKNKCVN | PNFNGLTGTG | VLTESNKKFL  | PFQQFGRDIA | DTTDAVRDPQ | TLEILDITPC | SFGGVSVITP |     |
| Iota    |     | YGVGYQPYRV | VVLSFELLHA | PATVCGPKKS | TNLVKNKCVN | PNFNGLTGTG | VLTESNKKFL  | PFQQFGRDIA | DTTDAVRDPQ | TLEILDITPC | SFGGVSVITP |     |
| Eta     |     | YGVGYQPYRV | VVLSFELLHA | PATVCGPKKS | TNLVKNKCVN | PNFNGLTGTG | VLTESNKKFL  | PFQQFGRDIA | DTTDAVRDPQ | TLEILDITPC | SFGGVSVITP |     |
| Lambda  |     | YGVGYQPYRV | VVLSFELLHA | PATVCGPKKS | TNLVKNKCVN | PNFNGLTGTG | VLTESNKKFL  | PFQQFGRDIA | DTTDAVRDPQ | TLEILDITPC | SFGGVSVITP |     |
| Mu      |     | YGVGYQPYRV | VVLSFELLHA | PATVCGPKKS | TNLVKNKCVN | PNFNGLTGTG | VLTESNKKFL  | PFQQFGRDIA | DTTDAVRDPQ | TLEILDITPC | SFGGVSVITP |     |
| Omicron |     | YGVGHQPYRV | VVLSFELLHA | PATVCGPKKS | TNLVKNKCVN | PNFNGLTGTG | VLTESNKKFL  | PFQQFGRDIA | DTTDAVRDPQ | TLEILDITPC | SFGGVSVITP |     |

|         |            |            |            |            |            |              |            |            |       |
|---------|------------|------------|------------|------------|------------|--------------|------------|------------|-------|
|         | 601        |            |            |            |            |              |            |            | 685   |
| Alpha   | GTNTSNQVAV | LYQGVNCTEV | PVAIHADQLT | PTWRVYSTGS | NVFQTRAGCL | IGAETHVNNYSY | ECDIPIGAGI | CASYQTQTNS | HRRAR |
| Beta    | GTNTSNQVAV | LYQGVNCTEV | PVAIHADQLT | PTWRVYSTGS | NVFQTRAGCL | IGAETHVNNYSY | ECDIPIGAGI | CASYQTQTNS | PRRAR |
| Gamma   | GTNTSNQVAV | LYQGVNCTEV | PVAIHADQLT | PTWRVYSTGS | NVFQTRAGCL | IGAETHVNNYSY | ECDIPIGAGI | CASYQTQTNS | PRRAR |
| Delta   | GTNTSNQVAV | LYQGVNCTEV | PVAIHADQLT | PTWRVYSTGS | NVFQTRAGCL | IGAETHVNNYSY | ECDIPIGAGI | CASYQTQTNS | PRRAR |
| Epsilon | GTNTSNQVAV | LYQGVNCTEV | PVAIHADQLT | PTWRVYSTGS | NVFQTRAGCL | IGAETHVNNYSY | ECDIPIGAGI | CASYQTQTNS | PRRAR |
| Kappa   | GTNTSNQVAV | LYQGVNCTEV | PVAIHADQLT | PTWRVYSTGS | NVFQTRAGCL | IGAETHVNNYSY | ECDIPIGAGI | CASYQTQTNS | PRRAR |
| Iota    | GTNTSNQVAV | LYQGVNCTEV | PVAIHADQLT | PTWRVYSTGS | NVFQTRAGCL | IGAETHVNNYSY | ECDIPIGAGI | CASYQTQTNS | PRRAR |
| Eta     | GTNTSNQVAV | LYQGVNCTEV | PVAIHADQLT | PTWRVYSTGS | NVFQTRAGCL | IGAETHVNNYSY | ECDIPIGAGI | CASYQTQTNS | PRRAR |
| Lambda  | GTNTSNQVAV | LYQGVNCTEV | PVAIHADQLT | PTWRVYSTGS | NVFQTRAGCL | IGAETHVNNYSY | ECDIPIGAGI | CASYQTQTNS | PRRAR |
| Mu      | GTNTSNQVAV | LYQGVNCTEV | PVAIHADQLT | PTWRVYSTGS | NVFQTRAGCL | IGAETHVNNYSY | ECDIPIGAGI | CASYQTQTNS | HRRAR |
| Omicron | GTNTSNQVAV | LYQGVNCTEV | PVAIHADQLT | PTWRVYSTGS | NVFQTRAGCL | IGAETHVNNYSY | ECDIPIGAGI | CASYQTQTNS | HRRAR |

The percentage coverage was determined by the Proteome Discoverer (Thermo Sci.) software, and the results were as follows: Alpha 87%; Beta 97%; Gamma 87%; Delta 89%; Epsilon 87%; Kappa 84%; Iota 86%; Eta 70%, Lambda 88%; Mu 85%; and Omicron 91%.

\*Sections highlighted in yellow show the protein percent coverage

\*Substituted amino acid residues are colored in red

\* “\_” Represents deletions

\* “↓” Indicates point of insertion

## Supplementary Figure S2

**Supplementary Figure S2.** Total *N*-glycan identifications and their relative abundance. SARS-CoV-2 S1 protein variants: H12 Alpha, H15 Beta, H14 Gamma, H23 Delta, H17 Epsilon, H29 Eta, H28 Iota, H1B Kappa, H32 Lambda, H38 Mu, and H41 Omicron.

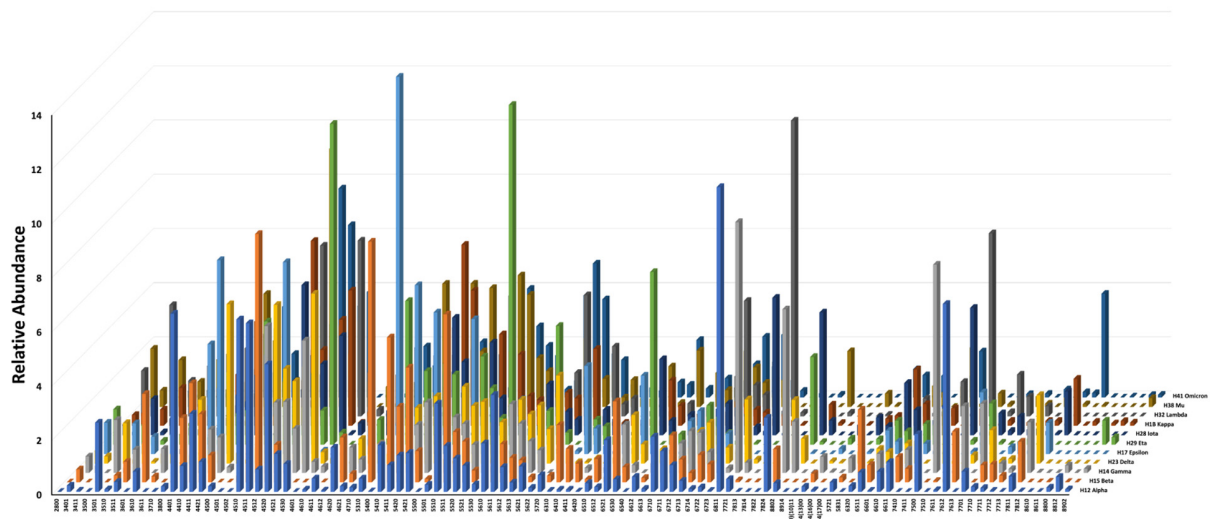

Supplementary Figure S3

**Supplementary Figure S3.** Bar plots of the total *N*-glycan abundance (peak area). SARS-CoV-2 S1 protein variants: H12 Alpha, H15 Beta, H14 Gamma, H23 Delta, H17 Epsilon, H29 Eta, H28 Iota, H1B Kappa, H32 Lambda, H38 Mu, and H41 Omicron.

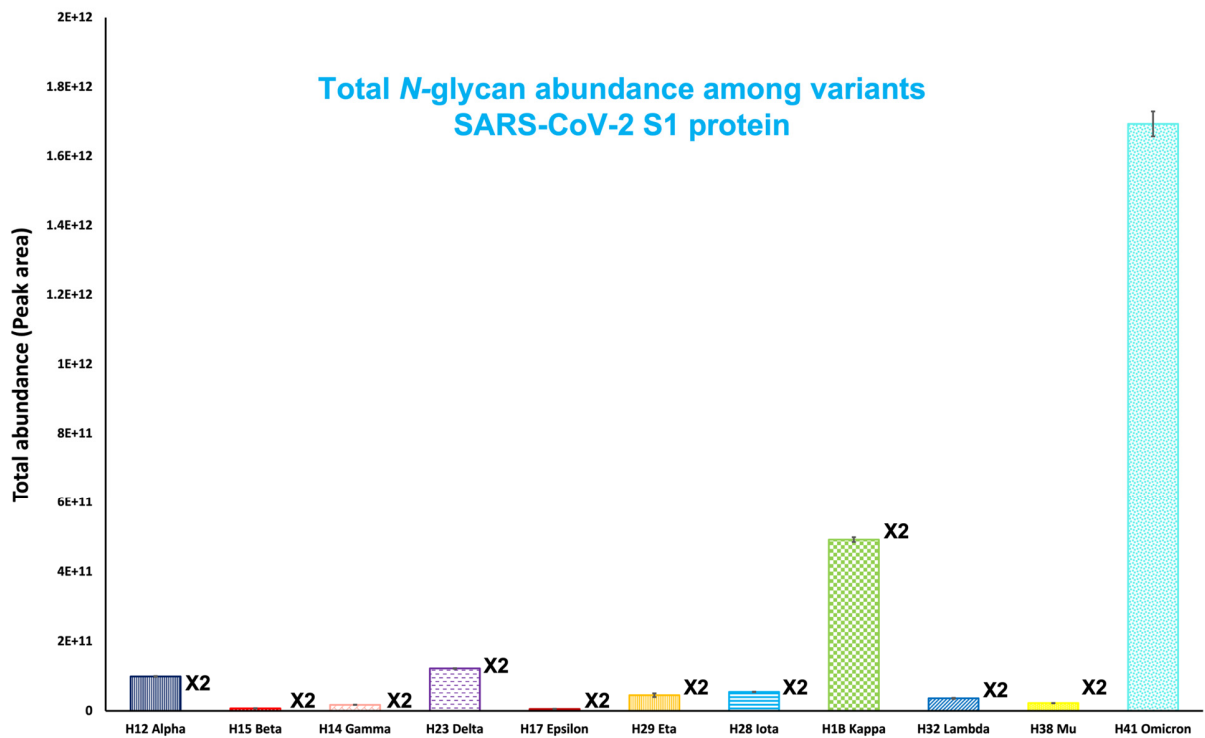

X2: These data were multiplied by two for better visualization.



## Supplementary Figure S4

**Supplementary Figure S4.** Principal Component Analysis (PCA) of the *N*-glycan relative abundance considering the observed isomeric structures. SARS-CoV-2 S1 protein variants: H12 Alpha, H15 Beta, H14 Gamma, H23 Delta, H17 Epsilon, H29 Eta, H28 Iota, H1B Kappa, H32 Lambda, H38 Mu, and H41 Omicron.

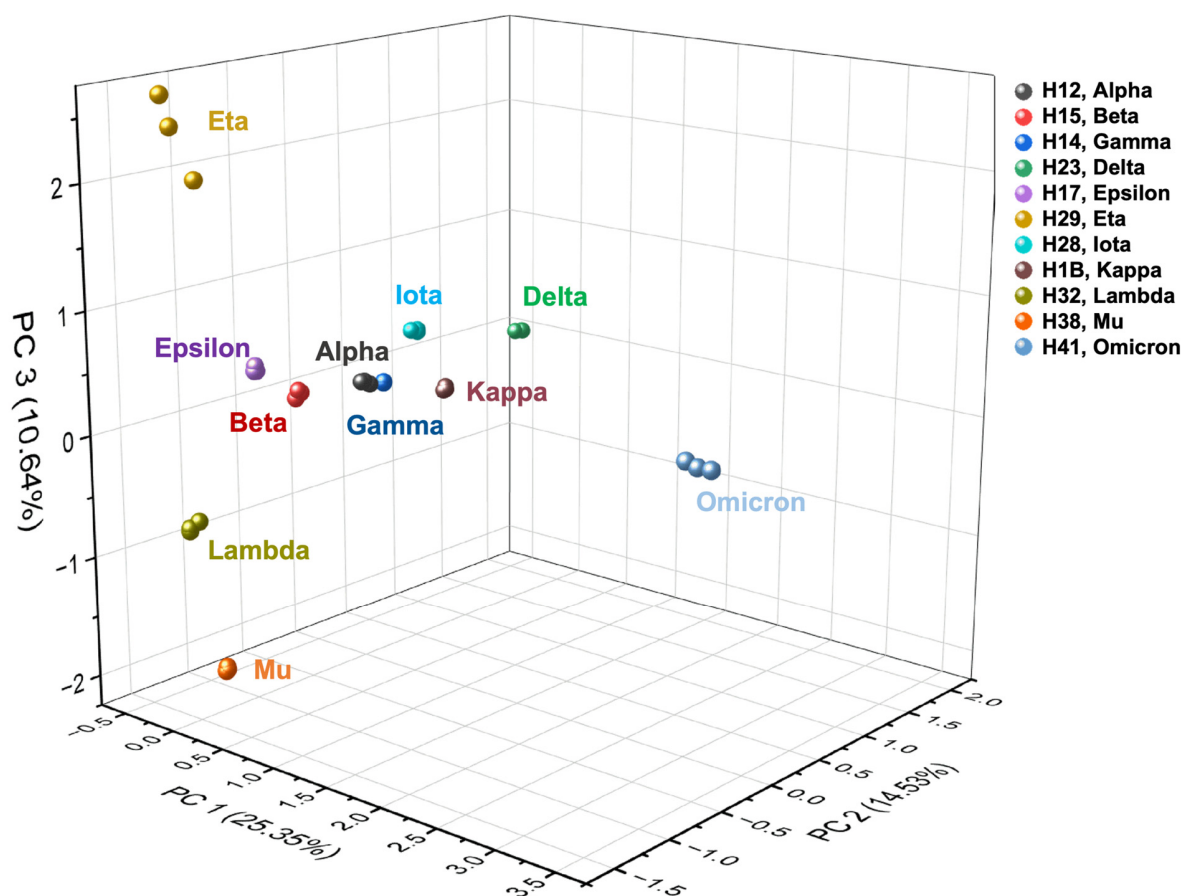

## Supplementary Figure S5

**Supplementary Figure S5.** Bar graphs of the relative abundance by type of *N*-glycans across the SARS-CoV-2 S1 protein variants: H12, H14, H15, H17, H23, H28, H29, H32, H38, H41, and H1B. **a)** Fucosylated, **b)** Sialylated, **c)** Sialofucosylated, **d)** High mannose, and **e)** Other *N*-glycan types.

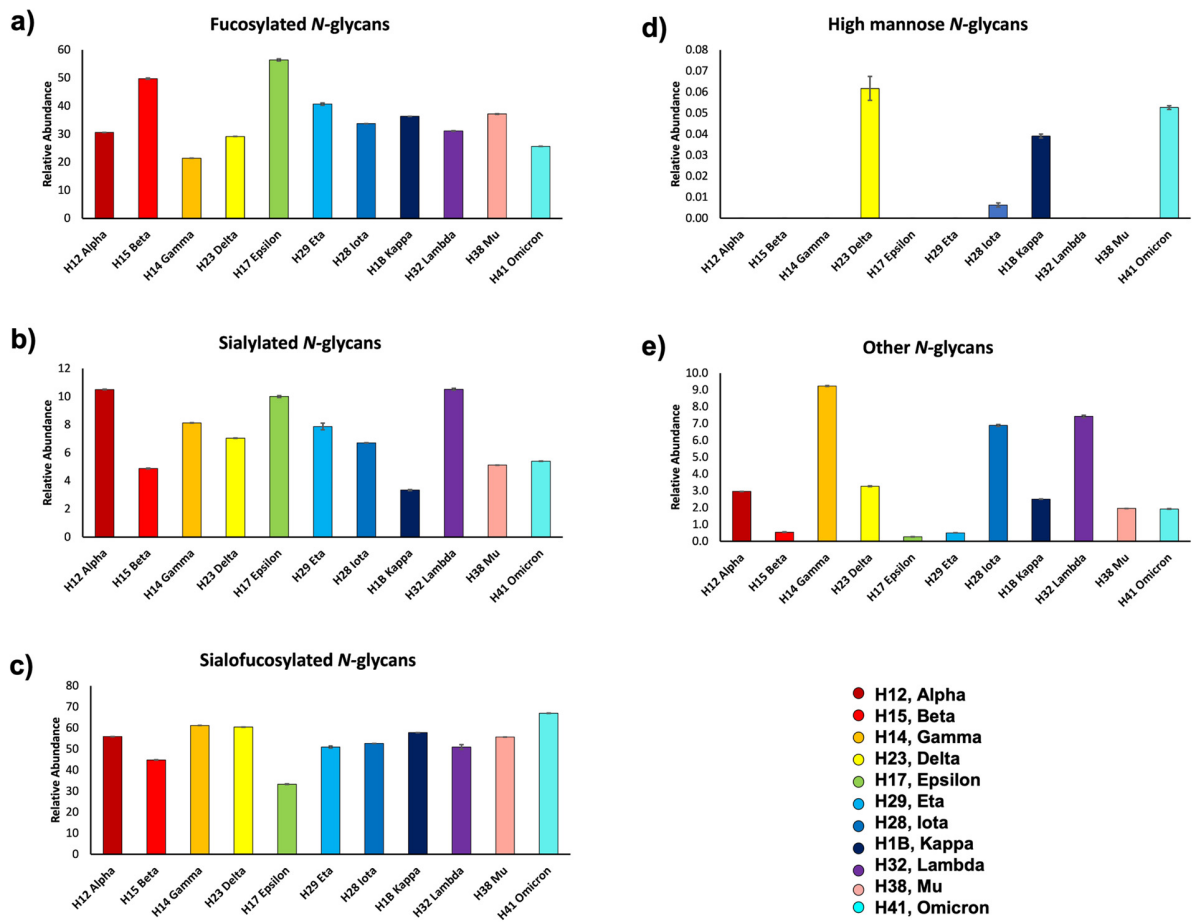

## Supplementary Figure S6

**Supplementary Figure S6.** Bar plot comparison of the relative abundance of **a)** mono-sialylated, **b)** tri-sialylated, **c)** di-sialylated, and **d)** tetra-sialylated *N*-glycan types. SARS-CoV-2 S1 protein variants: H12 Alpha, H15 Beta, H14 Gamma, H23 Delta, H17 Epsilon, H29 Eta, H28 Iota, H1B Kappa, H32 Lambda, H38 Mu, and H41 Omicron.

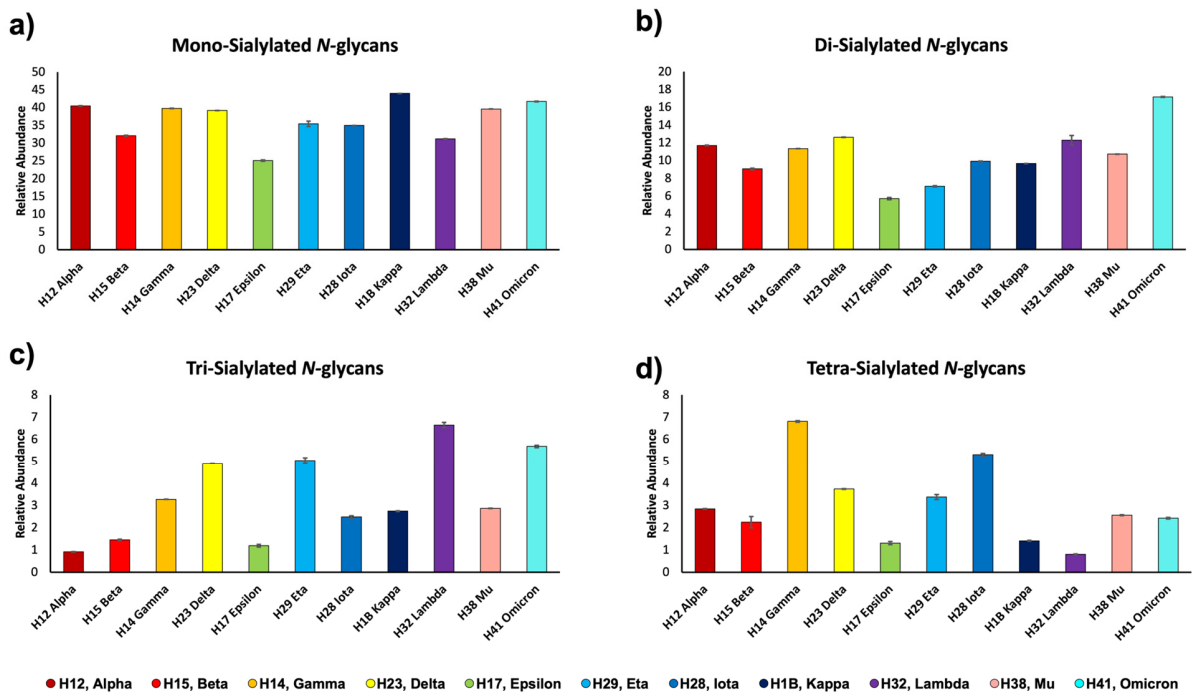

Supplementary Figure S7

**Supplementary Figure S7.** Heat maps of the relative abundance of **a)** mono-sialylated, **b)** di-sialylated, **c)** tri-sialylated, and **d)** tetra-sialylated *N*-glycan types. SARS-CoV-2 S1 protein variants: H12 Alpha, H15 Beta, H14 Gamma, H23 Delta, H17 Epsilon, H29 Eta, H28 Iota, H1B Kappa, H32 Lambda, H38 Mu, and H41 Omicron. The glycan nomenclature is described in **Figure 1** of the main manuscript.

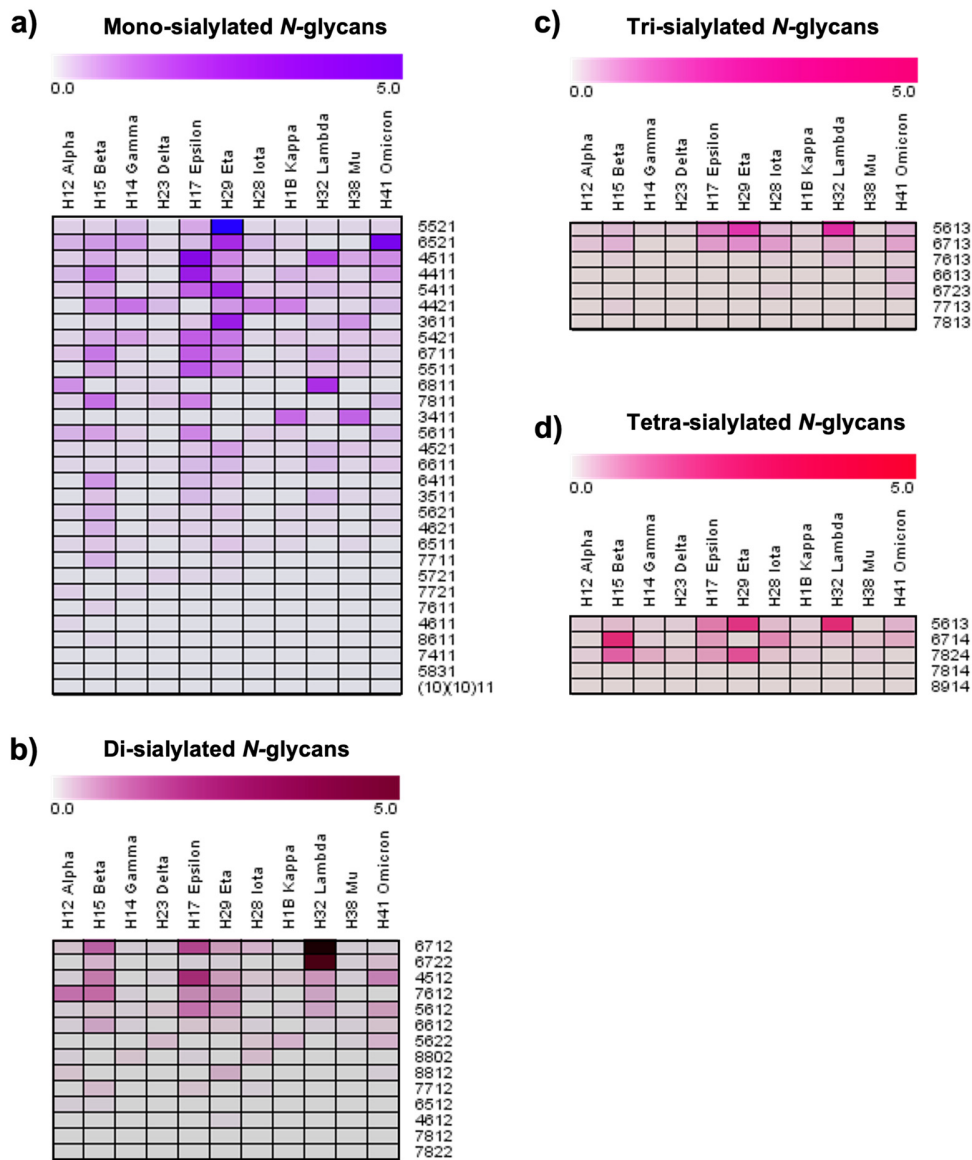

## Supplementary Figure S8

**Supplementary Figure S8.** Top ten *N*-glycans, relative abundance. SARS-CoV-2 S1 protein variants of interest: H17 Epsilon, H29 Eta, H28 Iota, H1B Kappa, H32 Lambda, and H38 Mu. The glycan nomenclature is described in **Figure 1** of the main manuscript.

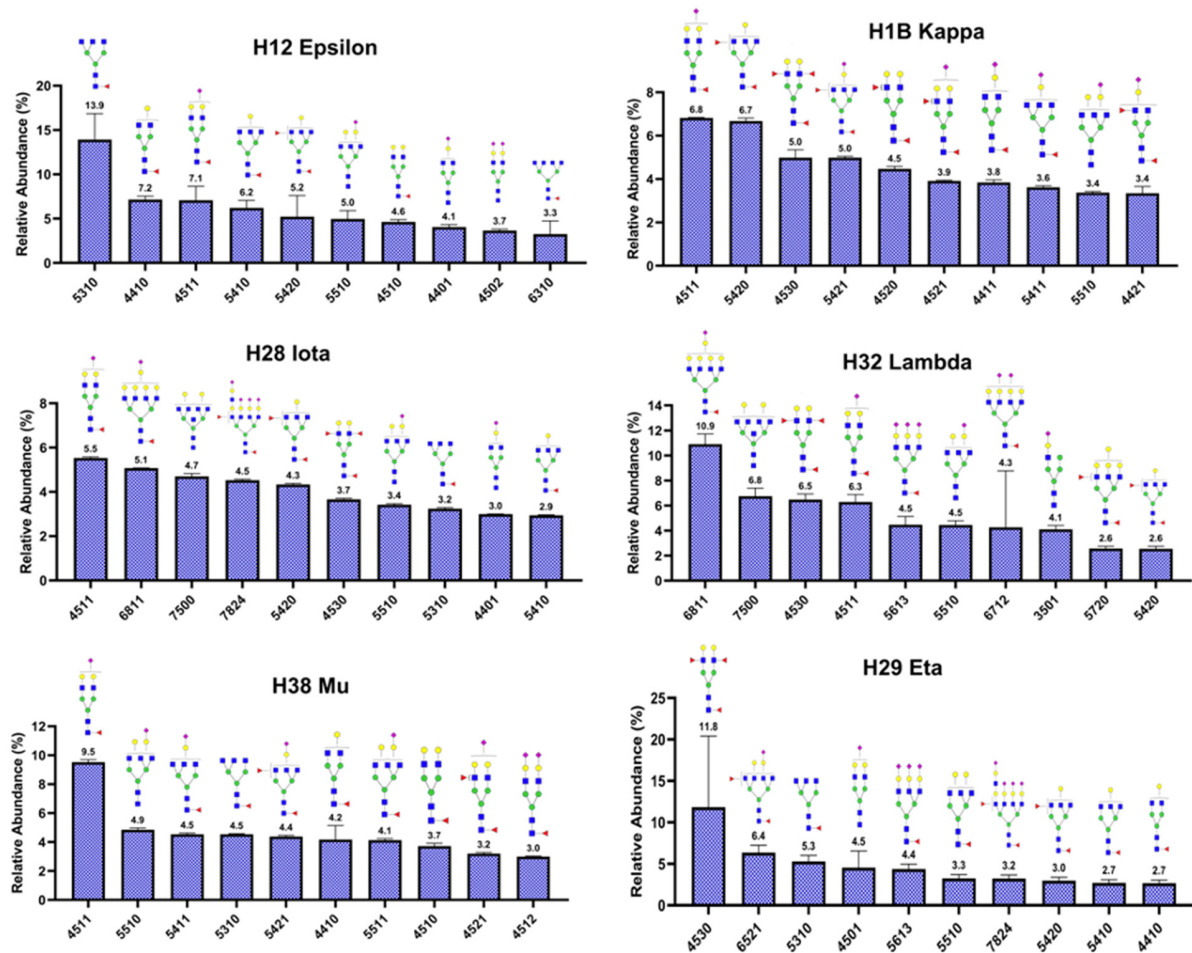

## Supplementary Figure S9

**Supplementary Figure S9.** Extracted ion chromatograms (EICs) showing the isomeric expressions of the *N*-glycans **a)** GlcNAc<sub>4</sub>, Hex<sub>5</sub>, Fuc, NeuAc; **b)** GlcNAc<sub>5</sub>, Hex<sub>6</sub>, Fuc, NeuAc; and **c)** GlcNAc<sub>4</sub>, Hex<sub>5</sub>, Fuc, Neu5Ac<sub>2</sub> across the analyzed SARS-CoV2 S1 protein variants (H12 Alpha, H15 Beta, H14 Gamma, H23 Delta, H17 Epsilon, H29 Eta, H28 Iota, H1B Kappa, H32 Lambda, H38 Mu, and H41 Omicron). The stars (\*) show the identified isoforms and the *N*-glycan nomenclature is described in **Figure 1** of the main manuscript.

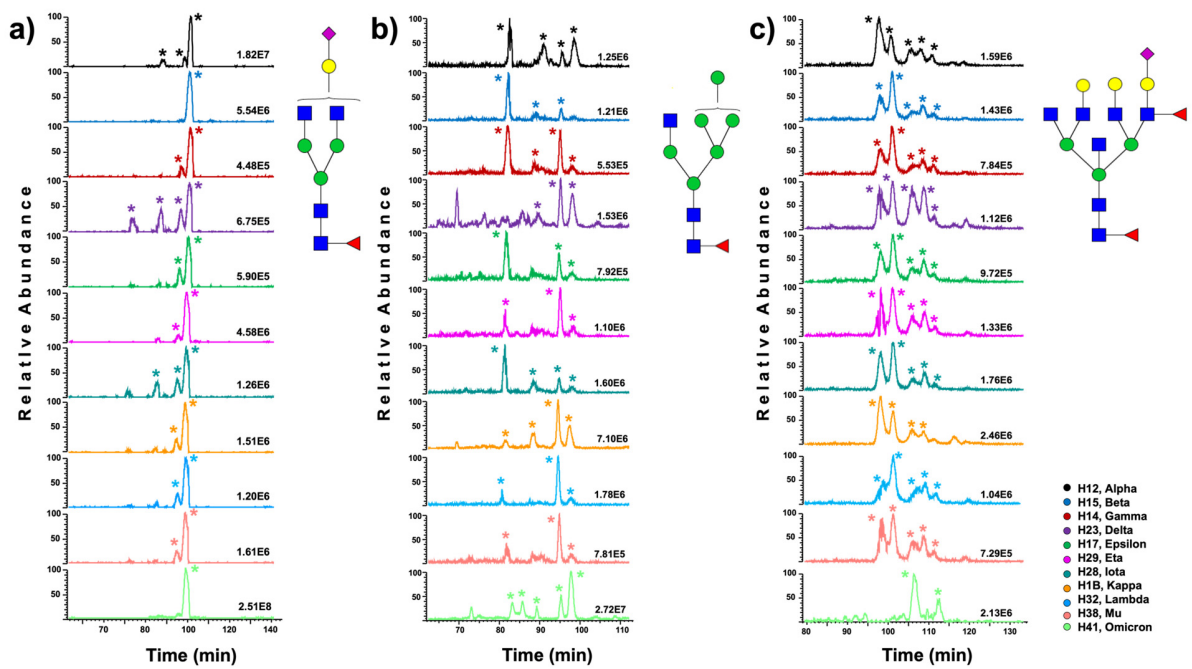

**Supplementary Table S1.** Relative abundance of the identified *N*-glycans. A four-digit *N*-glycan nomenclature was used in the following order: *N*-acetylglucosamine, Hexose, Fucose, *N*-acetylneuraminic acid (GlcNAc,Hex,Fuc,NeuAc). ND = Not detected.

| Glycan  | H12<br>Alpha | H15<br>Beta | H14<br>Gamma | H23<br>Delta | H17<br>Epsilon | H29<br>Eta | H28<br>Iota | H1B<br>Kappa | H32<br>Lambda | H38<br>Mu | H41<br>Omicron |
|---------|--------------|-------------|--------------|--------------|----------------|------------|-------------|--------------|---------------|-----------|----------------|
| 2-8-0-0 | ND           | ND          | ND           | 0.0617       | ND             | ND         | 0.0063      | 0.0391       | ND            | ND        | 0.0526         |
| 3-4-0-1 | 0.2299       | 0.4788      | 0.6079       | 0.4841       | 1.1581         | 1.3016     | 0.4166      | 0.3977       | 1.6788        | 2.1475    | 0.1064         |
| 3-4-1-1 | 0.0477       | ND          | 0.2616       | 0.2623       | ND             | ND         | 0.1221      | 0.4624       | 0.4736        | 0.6042    | ND             |
| 3-5-0-0 | 0.0015       | 0.0406      | ND           | 0.0363       | ND             | ND         | 0.0017      | 0.0061       | 0.0008        | 0.0061    | 0.0298         |
| 3-5-0-1 | 2.5531       | ND          | 1.9559       | 1.4901       | 1.1344         | 0.7449     | 1.3393      | 0.5982       | 4.1059        | 1.7300    | 0.2440         |
| 3-5-1-0 | 0.0939       | 0.2564      | 0.1934       | 0.1569       | 0.4144         | 0.2596     | 0.1099      | 0.2442       | 0.5223        | 0.5281    | 0.0961         |
| 3-5-1-1 | 0.3666       | 0.7604      | 0.8614       | 0.7498       | 0.6423         | 0.1446     | 0.6340      | 1.3998       | 1.3121        | 0.9291    | 0.2730         |
| 3-6-0-1 | ND           | 0.0072      | ND           | 0.0667       | ND             | ND         | 0.0323      | 0.0866       | 0.4366        | ND        | 0.0594         |
| 3-6-1-0 | 0.7473       | 3.2649      | ND           | 0.3683       | 0.7213         | 0.3827     | 0.2680      | 0.7916       | 1.8581        | 1.7463    | 0.1440         |
| 3-6-1-1 | ND           | 0.2199      | 0.8874       | 0.3543       | 0.1755         | 0.7962     | 0.2102      | 0.7287       | 1.0262        | 0.6380    | ND             |
| 3-7-1-0 | 0.0077       | ND          | ND           | 0.0329       | ND             | ND         | ND          | 0.0099       | 0.0409        | ND        | 0.0086         |
| 3-8-0-0 | 0.1991       | 0.0635      | 0.2678       | 0.3190       | 0.0460         | 0.2828     | 0.2729      | 0.2993       | 0.4099        | 0.9186    | ND             |
| 4-4-0-1 | 6.5741       | 2.3768      | 1.6423       | 2.3503       | 4.0557         | 0.1719     | 2.9947      | 1.8961       | 2.5116        | 0.4972    | 2.3519         |
| 4-4-1-0 | 0.9551       | 3.6607      | 0.4229       | 0.5189       | 7.1577         | 2.6718     | 1.4807      | 0.1955       | 1.7392        | 4.1703    | 0.9280         |
| 4-4-1-1 | 2.8835       | 2.5189      | 1.6028       | 0.4713       | 2.5605         | 1.1569     | 1.2283      | 3.8431       | 1.0816        | 2.4430    | 3.3495         |
| 4-4-2-1 | 1.1090       | 0.9992      | 1.3161       | 5.8819       | ND             | 1.2653     | 2.2065      | 3.3516       | 0.4665        | 0.9321    | 1.6052         |
| 4-5-0-0 | 0.2058       | ND          | 0.2086       | 0.3921       | ND             | ND         | 0.7009      | 0.3736       | ND            | ND        | 0.2924         |
| 4-5-0-1 | ND           | ND          | ND           | 0.1353       | ND             | 4.5445     | 0.0734      | ND           | ND            | ND        | 1.5620         |
| 4-5-0-2 | ND           | 0.2477      | ND           | 0.5827       | 3.6608         | 0.3710     | ND          | ND           | ND            | 0.2451    | 0.8502         |
| 4-5-1-0 | 6.3614       | 2.5607      | 1.3191       | 2.3319       | 4.6439         | 2.4542     | 2.0160      | 1.6817       | 2.4571        | 3.7224    | 2.7125         |
| 4-5-1-1 | 6.2205       | 9.1681      | 5.4206       | 5.8536       | 7.0832         | 1.6232     | 5.5383      | 6.8219       | 6.2980        | 9.5262    | 7.7136         |
| 4-5-1-2 | 0.8239       | 4.1081      | 2.5986       | 3.4961       | 1.1253         | 1.3849     | 2.2885      | 2.7976       | 2.2316        | 2.9952    | 6.3611         |
| 4-5-2-0 | 4.7067       | 1.3900      | 2.6201       | 3.0416       | 1.1884         | 1.3475     | 2.6252      | 4.4703       | 0.5070        | 1.9495    | 3.3856         |
| 4-5-2-1 | 1.3996       | 0.5315      | 1.6360       | 3.5830       | 0.5710         | 1.2603     | 1.3061      | 3.9145       | 1.4881        | 3.2060    | 3.8951         |
| 4-5-3-0 | 1.0300       | ND          | 4.8875       | 6.2682       | 0.1318         | 11.8384    | 3.6630      | 4.9933       | 6.4852        | 0.9384    | ND             |
| 4-6-0-1 | ND           | ND          | 0.4110       | 0.4170       | ND             | 0.4479     | 0.0525      | 0.1134       | 1.6165        | ND        | 0.0939         |
| 4-6-1-0 | 0.0844       | ND          | 0.2343       | 0.1985       | ND             | ND         | 0.4345      | 0.4990       | 0.2447        | 0.7419    | ND             |
| 4-6-1-1 | 0.4929       | 0.0090      | 0.0917       | ND           | ND             | 0.0469     | ND          | 0.0703       | 0.1027        | 0.1264    | 0.1366         |
| 4-6-1-2 | 0.0516       | ND          | 0.0986       | 0.0615       | ND             | 0.1926     | 0.0580      | 0.0759       | ND            | ND        | 0.0732         |
| 4-6-2-0 | 1.6313       | 1.6592      | 0.9416       | 0.9077       | 1.1638         | 0.9144     | 0.9068      | 1.8812       | ND            | 0.9099    | 1.8857         |
| 4-6-2-1 | 0.2073       | 0.3156      | 0.4972       | 0.6367       | 0.1516         | 0.2209     | 0.4440      | 0.8121       | 0.3954        | 0.2273    | 1.1764         |
| 4-7-1-0 | 0.1623       | ND          | 0.0781       | 0.7451       | ND             | ND         | 0.0905      | 0.0328       | ND            | 0.5302    | ND             |
| 5-3-1-0 | 0.4925       | 8.8851      | 1.0789       | 0.3587       | 13.9232        | 5.3036     | 3.2410      | 0.0929       | 0.4980        | 4.5446    | 0.9509         |
| 5-4-0-0 | 0.0184       | ND          | 0.1017       | 0.0549       | 0.0256         | ND         | 0.0737      | 0.2825       | 0.1452        | ND        | 0.1768         |
| 5-4-1-0 | 1.7173       | 5.3514      | 1.4752       | 1.6790       | 6.2321         | 2.7167     | 2.9411      | 2.2947       | 2.2700        | ND        | 1.7633         |
| 5-4-1-1 | 0.9820       | 2.7945      | 1.2079       | 2.0561       | 1.8771         | 1.4191     | 2.2819      | 3.6266       | 1.1006        | 4.5482    | 2.0432         |
| 5-4-2-0 | 1.3428       | 4.2368      | 1.7786       | 2.0961       | 5.2275         | 2.9894     | 4.3372      | 6.6787       | 2.5502        | 2.0527    | 2.0000         |
| 5-4-2-1 | 1.4328       | 1.1543      | 2.6106       | 2.4825       | 0.9709         | 2.5928     | 2.6983      | 4.9893       | 0.4023        | 4.3875    | 1.5896         |
| 5-5-0-0 | ND           | 0.1255      | 0.0639       | 0.1479       | ND             | ND         | 0.0915      | 0.4951       | 0.0614        | ND        | 0.3723         |
| 5-5-0-1 | 0.2643       | 1.7665      | 0.5206       | 0.1011       | ND             | ND         | 1.0570      | ND           | ND            | 0.0521    | ND             |
| 5-5-1-0 | 3.2554       | 6.1993      | 2.0553       | 2.8380       | 4.9791         | 3.2534     | 3.4223      | 3.3755       | 4.4536        | 4.8535    | 4.0122         |
| 5-5-1-1 | 1.6965       | 1.8607      | 1.8130       | 2.1293       | 1.6729         | 2.0861     | 1.3615      | 2.7487       | 2.2238        | 4.1354    | 2.6293         |
| 5-5-2-0 | 1.2347       | 1.5092      | 1.0399       | 2.2737       | 0.3439         | 0.9931     | 1.0827      | 2.6276       | 0.3792        | 1.8023    | 1.9090         |
| 5-5-2-1 | 0.9682       | 0.4376      | 1.0917       | 1.5171       | 0.5440         | 0.8806     | 0.7283      | 1.0956       | 0.2796        | 1.3234    | 1.5475         |
| 5-5-3-0 | 0.2760       | 0.0688      | 0.2206       | 1.5202       | 0.0995         | ND         | 0.2372      | 0.9523       | ND            | 0.5112    | 0.2957         |
| 5-6-1-0 | 1.7896       | 0.8443      | 0.4751       | 0.4966       | 2.0175         | 0.4982     | 0.3716      | 0.4964       | 0.5957        | 0.4408    | 0.6259         |
| 5-6-1-1 | 3.5747       | 1.4120      | 2.5426       | 2.3508       | 1.1296         | ND         | 1.8801      | 2.1127       | ND            | ND        | 3.7673         |
| 5-6-1-2 | 0.9141       | 0.9068      | 1.8252       | 1.8196       | 0.8833         | 1.2450     | 1.3774      | 1.2253       | 1.6031        | 2.5308    | 4.9448         |
| 5-6-1-3 | 0.3453       | 0.8170      | 1.1705       | 2.1483       | 0.6702         | 4.3818     | 0.8692      | 1.0098       | 4.4683        | 0.7095    | 3.6221         |
| 5-6-2-1 | 0.9380       | 0.1968      | 0.8382       | 1.2689       | 0.1989         | 0.4396     | 0.5737      | 0.9169       | 0.4826        | 1.0383    | 1.6193         |
| 5-6-2-2 | 0.1510       | ND          | ND           | 3.2481       | ND             | ND         | 2.1382      | 2.8365       | ND            | 1.3069    | 1.3835         |
| 5-7-2-0 | 0.6174       | 0.2487      | 0.3318       | 0.4740       | 0.1111         | 0.1183     | 0.2995      | 0.3474       | 2.5767        | 0.3473    | 0.4795         |
| 6-3-1-0 | 0.0423       | 2.1178      | 0.0176       | 0.0532       | 3.2515         | 0.9273     | 0.9405      | 0.1494       | 0.4444        | 0.9956    | 0.4333         |
| 6-4-1-0 | 0.0808       | 1.2441      | 0.1113       | 0.0502       | 0.9483         | 0.6777     | 0.5900      | 0.1121       | 0.6561        | 0.3165    | 0.3589         |
| 6-4-1-1 | 0.0807       | 0.6908      | 0.1835       | 0.1953       | 0.2908         | 0.2970     | 0.3914      | 0.3413       | ND            | 0.2927    | 0.2502         |
| 6-4-2-0 | 0.0169       | 0.1159      | ND           | 0.0479       | 0.1022         | 0.0831     | 0.1117      | 0.0710       | 0.1930        | 0.0720    | 0.0499         |
| 6-5-1-0 | 0.3207       | 0.8601      | 0.2025       | 0.2128       | 0.6714         | 0.2530     | 0.5702      | 0.2503       | 0.7264        | 1.4942    | 0.5595         |
| 6-5-1-2 | 0.1778       | 0.2024      | ND           | 0.1838       | 0.2112         | 0.0677     | 0.2781      | 0.2025       | 0.1705        | 0.1491    | 0.4712         |
| 6-5-2-1 | 1.9089       | 2.9908      | 1.7853       | 1.7890       | 2.8949         | 6.3706     | 2.8052      | 1.6716       | ND            | ND        | 2.1226         |

**Supplementary Table S1. Continued...**

| <b>Glycan</b> | <b>H12<br/>Alpha</b> | <b>H15<br/>Beta</b> | <b>H14<br/>Gamma</b> | <b>H23<br/>Delta</b> | <b>H17<br/>Epsilon</b> | <b>H29<br/>Eta</b> | <b>H28<br/>Iota</b> | <b>H1B<br/>Kappa</b> | <b>H32<br/>Lambda</b> | <b>H38<br/>Mu</b> | <b>H41<br/>Omicron</b> |
|---------------|----------------------|---------------------|----------------------|----------------------|------------------------|--------------------|---------------------|----------------------|-----------------------|-------------------|------------------------|
| 6-5-3-0       | 0.4619               | 0.5656              | 0.2841               | 0.7095               | 0.6037                 | ND                 | 0.5319              | 0.7359               | 0.4701                | 2.0806            | 0.3286                 |
| 6-5-4-0       | ND                   | 0.0164              | ND                   | ND                   | ND                     | 0.3511             | ND                  | 0.1573               | 0.0866                | ND                | 0.1316                 |
| 6-6-1-2       | 0.5539               | 0.1647              | 0.3410               | 0.5305               | 0.1506                 | 0.3810             | 0.7582              | 0.4387               | 0.3284                | 1.2529            | 0.7048                 |
| 6-6-1-3       | 0.1121               | ND                  | 0.3866               | 0.4492               | 0.0810                 | 0.1064             | 0.2153              | 0.3516               | ND                    | 0.6201            | 0.3623                 |
| 6-7-1-0       | 2.0387               | 0.8253              | 0.5272               | 0.2769               | 1.2184                 | 0.7097             | 0.6030              | 0.3067               | ND                    | 0.6870            | 0.6301                 |
| 6-7-1-1       | 1.4994               | 1.7377              | 1.0941               | 0.5972               | 1.5921                 | 1.4461             | 0.9671              | 0.5228               | 1.4728                | 2.0744            | 1.2331                 |
| 6-7-1-2       | 0.9869               | 0.8472              | 1.5482               | 1.2122               | 0.8106                 | 1.0261             | 1.1715              | 0.8924               | 4.2618                | 1.4572            | 2.2442                 |
| 6-7-1-3       | 0.4054               | 0.3446              | 1.4870               | 1.5104               | 0.3369                 | 0.4344             | 1.0170              | 0.8294               | 1.1479                | 0.8879            | 1.1462                 |
| 6-7-1-4       | 0.1103               | 1.0133              | 0.7714               | 1.3468               | 0.7550                 | 0.1415             | 0.7721              | 0.5966               | 0.7899                | 0.4929            | 2.3137                 |
| 6-7-2-2       | 0.1681               | 0.6691              | 0.4126               | 0.5891               | 0.0691                 | 0.2420             | 0.3014              | 0.4885               | 2.0110                | 0.9854            | 0.6412                 |
| 6-7-2-3       | 0.0368               | 0.0486              | 0.1766               | 0.4960               | 0.0303                 | 0.0484             | 0.1431              | 0.2781               | 0.1940                | 0.1629            | 0.2467                 |
| 6-8-1-1       | 11.2475              | ND                  | 9.2569               | 2.3647               | ND                     | ND                 | 5.0740              | 0.4175               | 10.9139               | ND                | ND                     |
| 7-7-2-1       | 0.4702               | 0.0788              | 0.3780               | 0.1504               | 0.0658                 | ND                 | 0.0703              | 0.2060               | 0.1354                | 0.0691            | 0.1540                 |
| 7-8-1-3       | 0.0101               | 0.0070              | ND                   | 0.0443               | ND                     | ND                 | 0.0210              | 0.0441               | 0.0363                | ND                | 0.0074                 |
| 7-8-1-4       | ND                   | 0.0107              | ND                   | 0.0306               | ND                     | ND                 | 0.0096              | 0.0224               | 0.0115                | 0.0112            | 0.1054                 |
| 7-8-2-2       | ND                   | 0.0124              | ND                   | 0.0185               | 0.0058                 | ND                 | 0.0383              | 0.0395               | ND                    | ND                | 0.0240                 |
| 7-8-2-4       | 2.7326               | 1.2243              | 6.0385               | 2.3468               | 0.5510                 | 3.2359             | 4.5306              | 0.7826               | ND                    | 2.0567            | ND                     |
| 8-8-0-2       | 0.3195               | ND                  | 1.8908               | 0.9163               | 0.0361                 | 0.0999             | 0.5356              | 0.1029               | 0.1368                | ND                | 0.0029                 |
| 8-9-1-4       | ND                   | ND                  | ND                   | 0.0112               | ND                     | ND                 | ND                  | 0.0080               | ND                    | ND                | 0.0037                 |
| 10-10-1-1     | ND                   | ND                  | ND                   | 0.0032               | ND                     | ND                 | ND                  | 0.0007               | ND                    | ND                | ND                     |
| 4-13-0-0      | 0.1922               | 0.3180              | 0.5973               | 0.0857               | 0.1992                 | 0.2241             | 0.3752              | 0.0372               | ND                    | 0.4934            | ND                     |
| 4-16-0-0      | 0.0573               | ND                  | 0.0338               | 0.0295               | ND                     | ND                 | 0.0192              | 0.0379               | 0.0569                | 0.0414            | ND                     |
| 4-17-0-0      | ND                   | ND                  | ND                   | 0.1828               | ND                     | ND                 | 0.6534              | 0.2592               | ND                    | ND                | 1.0435                 |
| 5-7-2-1       | 0.3486               | 0.1831              | 0.5455               | 0.4414               | 0.0664                 | 0.2042             | 0.3433              | 0.3667               | ND                    | ND                | 0.8199                 |
| 5-8-3-1       | ND                   | ND                  | ND                   | 0.0430               | ND                     | ND                 | 0.0131              | 0.0432               | ND                    | ND                | 0.0705                 |
| 6-3-2-0       | 0.2139               | 2.6856              | 0.2594               | 0.5442               | 0.8670                 | 0.8883             | 1.9262              | 2.0760               | 0.6539                | 0.7730            | 0.8007                 |
| 6-5-1-1       | 0.7171               | 0.6445              | 0.7052               | 0.4299               | 0.4628                 | 0.4964             | 0.9292              | 0.8026               | 0.1117                | 0.5359            | ND                     |
| 6-6-0-1       | 0.0396               | ND                  | 0.2801               | 0.1813               | ND                     | ND                 | 0.0520              | 0.0129               | 0.1756                | ND                | 0.0325                 |
| 6-6-1-0       | 0.7463               | ND                  | 0.5855               | 0.7484               | ND                     | 0.7678             | 0.5482              | 0.4669               | 0.2440                | 0.7520            | 0.7960                 |
| 6-6-1-1       | 1.1002               | 0.9416              | 0.8566               | 0.8307               | 0.3881                 | 0.7267             | 1.0929              | 0.6474               | 1.2682                | 2.1920            | 1.7005                 |
| 7-4-1-0       | ND                   | 0.4968              | 0.0127               | 0.0094               | 0.1163                 | 0.0302             | 0.0744              | 0.0252               | 0.0942                | 0.1060            | 0.0116                 |
| 7-4-1-1       | ND                   | 0.1066              | ND                   | 0.0148               | 0.0730                 | ND                 | 0.0534              | 0.0551               | ND                    | ND                | 0.0149                 |
| 7-5-0-0       | 2.1337               | ND                  | 7.6868               | 2.0242               | ND                     | ND                 | 4.7008              | 0.6340               | 6.7546                | 0.4969            | 0.0101                 |
| 7-5-1-0       | ND                   | 0.0524              | 0.0447               | 0.0930               | 0.0173                 | 0.1466             | 0.1007              | 0.0470               | ND                    | 0.0984            | 0.0479                 |
| 7-6-1-1       | 0.0612               | 0.1234              | 0.0835               | 0.0311               | 0.1006                 | 0.0748             | 0.1345              | 0.0831               | 0.1575                | 0.0459            | 0.1256                 |
| 7-6-1-2       | 6.9347               | 1.8745              | 2.4661               | 0.3086               | 2.2789                 | 1.5215             | 0.8091              | 0.1866               | 1.5409                | ND                | ND                     |
| 7-6-1-3       | ND                   | 0.1743              | ND                   | 0.1365               | 0.0535                 | 0.0743             | 0.1612              | 0.1380               | 0.7277                | 0.3820            | 0.1393                 |
| 7-7-0-1       | 0.7484               | ND                  | 2.5590               | 1.2309               | ND                     | 0.0138             | 0.6863              | 0.1234               | ND                    | 0.1220            | ND                     |
| 7-7-1-0       | 0.1862               | 0.6364              | 0.2334               | 0.1164               | 0.2575                 | 0.1014             | 0.2097              | 0.1011               | 0.3750                | ND                | 0.2971                 |
| 7-7-1-1       | 0.1411               | 0.6671              | 0.3452               | 0.1720               | 0.4401                 | 0.2203             | 0.2423              | 0.1784               | ND                    | 0.3365            | 0.0182                 |
| 7-7-1-2       | 0.0414               | 0.2496              | 0.1431               | 0.2176               | 0.1290                 | 0.0492             | 0.1524              | 0.1797               | ND                    | ND                | 0.1948                 |
| 7-7-1-3       | 0.0071               | 0.0583              | 0.0496               | 0.1266               | 0.0173                 | ND                 | 0.0535              | 0.0872               | 0.0723                | 0.0988            | 0.1599                 |
| 7-8-1-1       | 0.5720               | 1.5039              | 1.8682               | 2.5233               | 1.1583                 | ND                 | 1.6114              | 1.7344               | ND                    | ND                | 3.8279                 |
| 7-8-1-2       | 0.0189               | 0.0043              | 0.0205               | 0.0201               | 0.0053                 | ND                 | 0.0168              | 0.0252               | ND                    | 0.0492            | 0.0199                 |
| 8-6-1-0       | ND                   | ND                  | ND                   | ND                   | ND                     | ND                 | ND                  | 0.1478               | ND                    | ND                | ND                     |
| 8-6-1-1       | ND                   | 0.0240              | ND                   | 0.0053               | ND                     | ND                 | 0.0093              | 0.0090               | ND                    | ND                | 0.0357                 |
| 8-8-0-0       | 0.1580               | ND                  | 0.2756               | ND                   | ND                     | ND                 | ND                  | 0.0891               | ND                    | ND                | ND                     |
| 8-8-1-2       | 0.5504               | 0.0156              | ND                   | ND                   | ND                     | 0.8879             | ND                  | 0.1735               | ND                    | ND                | 0.0896                 |
| 8-9-0-2       | 0.0934               | ND                  | 0.1511               | ND                   | ND                     | 0.2732             | ND                  | 0.1199               | ND                    | 0.3249            | 0.0997                 |



**Supplementary Table S2.** Relative standard deviation (%RSD) of the relative abundance of the identified *N*-glycans. A four-digit *N*-glycan nomenclature was used in the following order: *N*-acetylglucosamine, Hexose, Fucose, *N*-acetylneuraminic acid (GlcNAc,Hex,Fuc,NeuAc).

| Glycan  | H12<br>Alpha | H15<br>Beta | H14<br>Gamma | H23<br>Delta | H17<br>Epsilon | H29<br>Eta | H28<br>Iota | H1B<br>Kappa | H32<br>Lambda | H38<br>Mu | H41<br>Omicron |
|---------|--------------|-------------|--------------|--------------|----------------|------------|-------------|--------------|---------------|-----------|----------------|
| 2-8-0-0 | ND           | ND          | ND           | 0.0057       | ND             | ND         | 0.0010      | 0.0009       | ND            | ND        | 0.0008         |
| 3-4-0-1 | 0.0052       | 0.0797      | 0.0101       | 0.0041       | 0.1296         | 0.1688     | 0.0077      | 0.3167       | 0.1305        | 0.0327    | 0.0166         |
| 3-4-1-1 | 0.0047       | ND          | 0.0075       | 0.0045       | ND             | ND         | 0.0010      | 0.3998       | 0.0283        | 0.4488    | ND             |
| 3-5-0-0 | 0.0003       | 0.0086      | ND           | 0.0038       | ND             | ND         | ND          | 0.0056       | 0.0001        | 0.0001    | 0.0013         |
| 3-5-0-1 | 0.0203       | ND          | 0.0721       | 0.0042       | 0.1921         | 0.2988     | 0.0405      | 0.0604       | 0.3004        | 0.0183    | 0.0097         |
| 3-5-1-0 | 0.0045       | 0.0769      | 0.0038       | 0.0120       | 0.0486         | 0.0566     | 0.0019      | 0.0033       | 0.0612        | 0.1648    | 0.0114         |
| 3-5-1-1 | 0.0132       | 0.0977      | 0.0186       | 0.0024       | 0.1029         | 0.0370     | 0.0113      | 0.0112       | 0.1048        | 0.0293    | 0.0265         |
| 3-6-0-1 | ND           | 0.0017      | ND           | 0.0033       | ND             | ND         | 0.0039      | 0.0021       | 0.0382        | ND        | 0.0047         |
| 3-6-1-0 | 0.0346       | 0.9744      | ND           | 0.0128       | 0.0489         | 0.0524     | 0.0054      | 0.0214       | 0.1500        | 0.0283    | 0.0030         |
| 3-6-1-1 | ND           | 0.0371      | 0.0153       | 0.0183       | 0.0779         | 1.0497     | 0.0068      | 0.0140       | 0.1015        | 0.2331    | ND             |
| 3-7-1-0 | 0.0016       | ND          | ND           | 0.0022       | ND             | ND         | ND          | 0.0015       | 0.0041        | ND        | 0.0003         |
| 3-8-0-0 | 0.0239       | 0.0182      | 0.0375       | 0.0039       | 0.0038         | 0.0463     | 0.0201      | 0.0183       | 0.0404        | 0.0493    | ND             |
| 4-4-0-1 | 0.1158       | 0.2404      | 0.0044       | 0.0513       | 0.2670         | 0.0292     | 0.0104      | 0.0207       | 0.2101        | 0.0085    | 0.0157         |
| 4-4-1-0 | 0.0132       | 0.2944      | 0.0080       | 0.0023       | 0.3761         | 0.3708     | 0.0400      | 0.0005       | 0.6028        | 0.9789    | 0.0194         |
| 4-4-1-1 | 0.1000       | 0.3365      | 0.0452       | 0.0078       | 1.0571         | 0.1772     | 0.0277      | 0.1222       | 0.0900        | 0.0318    | 0.1927         |
| 4-4-2-1 | 0.0037       | 0.2602      | 0.3700       | 0.0997       | ND             | 0.2209     | 0.3041      | 0.3064       | 0.0347        | 0.0247    | 0.1065         |
| 4-5-0-0 | 0.0099       | ND          | 0.0028       | 0.0048       | ND             | ND         | 0.0147      | 0.0067       | ND            | ND        | 0.0080         |
| 4-5-0-1 | ND           | ND          | ND           | 0.0081       | ND             | 1.9997     | 0.0247      | ND           | ND            | ND        | 0.0537         |
| 4-5-0-2 | ND           | 0.0194      | ND           | 0.0227       | 0.1504         | 0.0325     | ND          | ND           | ND            | 0.0058    | 0.0273         |
| 4-5-1-0 | 0.1667       | 0.2055      | 0.0360       | 0.0325       | 0.2528         | 0.3552     | 0.0230      | 0.0086       | 0.2935        | 0.1879    | 0.1944         |
| 4-5-1-1 | 0.0555       | 0.1398      | 0.0568       | 0.0323       | 1.5633         | 0.2774     | 0.0454      | 0.0210       | 0.5782        | 0.1659    | 0.2659         |
| 4-5-1-2 | 0.0365       | 0.2413      | 0.0029       | 0.0309       | 0.6505         | 0.1536     | 0.0506      | 0.0392       | 0.1614        | 0.0376    | 0.2260         |
| 4-5-2-0 | 0.0571       | 0.2388      | 0.0127       | 0.0301       | 0.1723         | 0.1498     | 0.0161      | 0.1123       | 0.0391        | 1.0675    | 0.2952         |
| 4-5-2-1 | 0.0246       | 0.0272      | 0.0246       | 0.0109       | 0.0670         | 0.1795     | 0.0208      | 0.0363       | 0.1164        | 0.0772    | 0.0321         |
| 4-5-3-0 | 0.0137       | ND          | 0.2157       | 0.0920       | 0.0708         | 8.5662     | 0.0438      | 0.3584       | 0.4426        | 0.0205    | ND             |
| 4-6-0-1 | ND           | ND          | 0.0077       | 0.0218       | ND             | 0.0484     | 0.0081      | 0.0043       | 0.1297        | ND        | 0.0045         |
| 4-6-1-0 | 0.0062       | ND          | 0.0207       | 0.0058       | ND             | ND         | 0.0172      | 0.0072       | 0.0086        | 0.0240    | ND             |
| 4-6-1-1 | 0.0385       | 0.0051      | 0.0004       | ND           | ND             | 0.0061     | ND          | 0.0009       | 0.0069        | 0.0020    | 0.0034         |
| 4-6-1-2 | 0.0047       | ND          | 0.0059       | 0.0055       | ND             | 0.0242     | 0.0042      | 0.0008       | ND            | ND        | 0.0022         |
| 4-6-2-0 | 0.1205       | 0.1431      | 0.0397       | 0.0650       | 0.2957         | 0.1480     | 0.0127      | 0.0296       | ND            | 0.0298    | 0.1332         |
| 4-6-2-1 | 0.0068       | 0.1201      | 0.0164       | 0.0378       | 0.0472         | 0.0291     | 0.0135      | 0.0235       | 0.0242        | 0.0033    | 0.0369         |
| 4-7-1-0 | 0.0067       | ND          | 0.0065       | 0.0019       | ND             | ND         | 0.0026      | 0.0006       | ND            | 0.0254    | ND             |
| 5-3-1-0 | 0.0125       | 0.2943      | 0.0213       | 0.0033       | 2.9328         | 0.7148     | 0.0492      | 0.0009       | 0.0385        | 0.0453    | 0.0206         |
| 5-4-0-0 | 0.0028       | ND          | 0.0062       | 0.0041       | 0.0142         | ND         | 0.0020      | 0.0038       | 0.0122        | ND        | 0.0052         |
| 5-4-1-0 | 0.0764       | 0.3024      | 0.0128       | 0.0122       | 0.8299         | 0.3866     | 0.0216      | 0.0437       | 0.1838        | ND        | 0.1057         |
| 5-4-1-1 | 0.0401       | 0.1649      | 0.0074       | 0.0484       | 0.4636         | 0.9747     | 0.0632      | 0.0621       | 0.1042        | 0.0750    | 0.0415         |
| 5-4-2-0 | 0.0899       | 0.3468      | 0.2023       | 0.0619       | 2.3779         | 0.4047     | 0.0490      | 0.1389       | 0.2022        | 0.0308    | 0.0508         |
| 5-4-2-1 | 0.0349       | 0.1510      | 0.1908       | 0.0422       | 0.4846         | 0.3505     | 0.0217      | 0.0588       | 0.0289        | 0.0730    | 0.0688         |
| 5-5-0-0 | ND           | 0.0218      | 0.0007       | 0.0023       | ND             | ND         | 0.0019      | 0.0153       | 0.0056        | ND        | 0.0102         |
| 5-5-0-1 | 0.0295       | 0.1730      | 0.0560       | 0.0146       | ND             | ND         | 0.0848      | ND           | ND            | 0.0016    | ND             |
| 5-5-1-0 | 0.0616       | 0.4931      | 0.0591       | 0.0183       | 0.9288         | 0.4413     | 0.0469      | 0.0519       | 0.3408        | 0.1192    | 0.0886         |
| 5-5-1-1 | 0.0175       | 0.1950      | 0.0298       | 0.0208       | 0.5236         | 0.2934     | 0.0338      | 0.0364       | 0.0970        | 0.0954    | 0.0327         |
| 5-5-2-0 | 0.0571       | 0.0741      | 0.0893       | 0.0335       | 0.1240         | 0.1552     | 0.0504      | 0.0454       | 0.0359        | 0.0512    | 0.0597         |
| 5-5-2-1 | 0.0556       | 0.0471      | 0.1119       | 0.0189       | 0.1746         | 19.7351    | 0.0341      | 0.0296       | 0.0242        | 0.0338    | 0.0585         |
| 5-5-3-0 | 0.0025       | 0.0008      | 0.0030       | 0.0111       | 0.0227         | ND         | 0.0027      | 0.0182       | ND            | 0.0071    | 0.0583         |
| 5-6-1-0 | 0.0667       | 0.1091      | 0.0046       | 0.0224       | 0.6012         | 0.0561     | 0.0052      | 0.0110       | 0.0366        | 0.0069    | 0.0134         |
| 5-6-1-1 | 0.1331       | 0.1891      | 0.0487       | 0.0190       | 0.2893         | ND         | 0.0464      | 0.0587       | ND            | ND        | 0.1017         |
| 5-6-1-2 | 0.0316       | 0.0458      | 0.0367       | 0.0487       | 0.2822         | 0.1616     | 0.0072      | 0.0317       | 0.1358        | 0.0223    | 0.1445         |
| 5-6-1-3 | 0.0285       | 0.0736      | 0.0239       | 0.0315       | 0.2419         | 0.5905     | 0.0715      | 0.0259       | 0.6601        | 0.0096    | 0.0948         |
| 5-6-2-1 | 0.0323       | 0.1184      | 0.0086       | 0.0233       | 0.0275         | 0.0604     | 0.0105      | 0.0288       | 0.0263        | 0.0069    | 0.0298         |
| 5-6-2-2 | 0.0124       | ND          | ND           | 0.0725       | ND             | ND         | 0.0425      | 0.0829       | ND            | 0.0244    | 0.0892         |
| 5-7-2-0 | 0.0175       | 0.0653      | 0.0081       | 0.0272       | 0.0329         | 0.0164     | 0.0117      | 0.0106       | 0.1744        | 0.0093    | 0.0252         |
| 6-3-1-0 | 0.0015       | 0.5163      | 0.0006       | 0.0021       | 1.4886         | 0.1018     | 0.0267      | 0.0030       | 0.0426        | 0.0220    | 0.0091         |
| 6-4-1-0 | 0.0042       | 0.4480      | 0.0033       | 0.0029       | 0.1751         | 0.0949     | 0.0101      | 0.0012       | 0.0554        | 0.0037    | 0.0143         |
| 6-4-1-1 | 0.0073       | 0.2262      | 0.0045       | 0.0061       | 0.1054         | 0.0719     | 0.0024      | 0.0155       | ND            | 0.0047    | 0.0121         |
| 6-4-2-0 | 0.0025       | 0.0277      | ND           | 0.0039       | 0.0185         | 0.0113     | 0.0030      | 0.0056       | 0.2559        | 0.0010    | 0.0034         |
| 6-5-1-0 | 0.0095       | 0.0283      | 0.0032       | 0.0074       | 0.0808         | 0.1165     | 0.0178      | 0.0049       | 0.0558        | 0.0774    | 0.0080         |
| 6-5-1-2 | 0.0237       | 0.0280      | ND           | 0.0038       | 0.0166         | 0.0091     | 0.0065      | 0.0052       | 0.0129        | 0.0024    | 0.0164         |
| 6-5-2-1 | 0.1320       | 0.1992      | 0.2156       | 0.0371       | 0.1071         | 0.8790     | 0.1171      | 0.0446       | ND            | ND        | 1.8678         |

**Supplementary Table S2. Continued...**

| <b>Glycan</b> | <b>H12<br/>Alpha</b> | <b>H15<br/>Beta</b> | <b>H14<br/>Gamma</b> | <b>H23<br/>Delta</b> | <b>H17<br/>Epsilon</b> | <b>H29<br/>Eta</b> | <b>H28<br/>Iota</b> | <b>H1B<br/>Kappa</b> | <b>H32<br/>Lambda</b> | <b>H38<br/>Mu</b> | <b>H41<br/>Omicron</b> |
|---------------|----------------------|---------------------|----------------------|----------------------|------------------------|--------------------|---------------------|----------------------|-----------------------|-------------------|------------------------|
| 6-5-3-0       | 0.0131               | 0.0809              | 0.0158               | 0.0473               | 0.0222                 | ND                 | 0.0172              | 0.0242               | 0.0356                | 0.0389            | 0.0924                 |
| 6-5-4-0       | ND                   | 0.0081              | ND                   | ND                   | ND                     | 0.0535             | ND                  | 0.0033               | 0.0080                | ND                | 0.0133                 |
| 6-6-1-2       | 0.0270               | 0.1279              | 0.0286               | 0.0064               | 0.0425                 | 0.0471             | 0.0306              | 0.0119               | 0.0270                | 0.0337            | 0.0555                 |
| 6-6-1-3       | 0.0141               | ND                  | 0.0056               | 0.0037               | 0.0132                 | 0.0144             | 0.0187              | 0.0087               | ND                    | 0.0185            | 0.0652                 |
| 6-7-1-0       | 0.0672               | 0.5561              | 0.0081               | 0.0043               | 0.7849                 | 0.0961             | 0.0074              | 0.0045               | ND                    | 0.0120            | 0.1242                 |
| 6-7-1-1       | 0.0665               | 0.3514              | 0.0216               | 0.0049               | 0.4707                 | 0.2830             | 0.0158              | 0.0371               | 0.1187                | 0.0505            | 0.0230                 |
| 6-7-1-2       | 0.0574               | 0.3376              | 0.0379               | 0.0388               | 0.4891                 | 0.1537             | 0.0941              | 0.0347               | 4.5226                | 0.0244            | 0.0196                 |
| 6-7-1-3       | 0.0486               | 0.0844              | 0.0041               | 0.0138               | 0.1443                 | 0.1798             | 0.1539              | 0.0350               | 0.0995                | 0.0200            | 0.1321                 |
| 6-7-1-4       | 0.0085               | 0.6744              | 0.0298               | 0.0150               | 0.1428                 | 0.0192             | 0.2021              | 0.0412               | 0.0700                | 0.0545            | 0.1152                 |
| 6-7-2-2       | 0.0104               | 0.0851              | 0.0099               | 0.0093               | 0.0282                 | 0.0322             | 0.0169              | 0.0164               | 2.4807                | 0.0216            | 0.0668                 |
| 6-7-2-3       | 0.0039               | 0.0026              | 0.0053               | 0.0115               | 0.0053                 | 0.0065             | 0.0244              | 0.0127               | 0.0152                | 0.0043            | 0.0522                 |
| 6-8-1-1       | 0.2404               | ND                  | 0.0319               | 0.0300               | ND                     | ND                 | 0.0092              | 0.0098               | 0.8062                | ND                | ND                     |
| 7-7-2-1       | 0.0503               | 0.0102              | 0.0298               | 0.0024               | 0.0129                 | ND                 | 0.0071              | 0.0158               | 0.0099                | 0.0016            | 0.0062                 |
| 7-8-1-3       | 0.0016               | 0.0011              | ND                   | 0.0015               | ND                     | ND                 | 0.0094              | 0.0029               | 0.0018                | ND                | 0.0004                 |
| 7-8-1-4       | ND                   | 0.0013              | ND                   | 0.0004               | ND                     | ND                 | 0.0036              | 0.0010               | 0.0008                | 0.0005            | 0.0117                 |
| 7-8-2-2       | ND                   | 0.0032              | ND                   | 0.0021               | 0.0010                 | ND                 | 0.0020              | 0.0029               | ND                    | ND                | 0.0026                 |
| 7-8-2-4       | 0.0322               | 0.3391              | 0.1118               | 0.0527               | 0.1528                 | 0.4297             | 0.0408              | 0.0206               | ND                    | 0.0296            | ND                     |
| 8-8-0-2       | 0.0253               | ND                  | 0.0490               | 0.0111               | 0.0295                 | 0.0135             | 0.0681              | 0.0049               | 0.0110                | ND                | 0.0005                 |
| 8-9-1-4       | ND                   | ND                  | ND                   | 0.0003               | ND                     | ND                 | ND                  | 0.0028               | ND                    | ND                | 0.0013                 |
| 10-10-1-1     | ND                   | ND                  | ND                   | 0.0003               | ND                     | ND                 | ND                  | 0.0002               | ND                    | ND                | ND                     |
| 4-13-0-0      | 0.0119               | 0.1075              | 0.0133               | 0.0054               | 0.0842                 | 0.0213             | 0.0200              | 0.0022               | ND                    | 0.0073            | ND                     |
| 4-16-0-0      | 0.0066               | ND                  | 0.0058               | 0.0006               | ND                     | ND                 | 0.0061              | 0.0034               | 0.0116                | 0.0125            | ND                     |
| 4-17-0-0      | ND                   | ND                  | ND                   | 0.1718               | ND                     | ND                 | 0.3777              | 0.0265               | ND                    | ND                | 0.1514                 |
| 5-7-2-1       | 0.0120               | 0.0071              | 0.0116               | 0.0454               | 0.0328                 | 0.0217             | 0.0085              | 0.0107               | ND                    | ND                | 0.0125                 |
| 5-8-3-1       | ND                   | ND                  | ND                   | 0.0046               | ND                     | ND                 | 0.0009              | 0.0006               | ND                    | ND                | 0.0070                 |
| 6-3-2-0       | 0.0204               | 0.9226              | 0.0047               | 0.0164               | 0.2728                 | 0.1833             | 0.0573              | 0.0354               | 0.0516                | 0.0168            | 0.0321                 |
| 6-5-1-1       | 0.0245               | 0.0604              | 0.0242               | 0.0090               | 0.0332                 | 0.0588             | 0.0337              | 0.0266               | 0.0087                | 0.0232            | ND                     |
| 6-6-0-1       | 0.0034               | ND                  | 0.0068               | 0.0075               | ND                     | ND                 | 0.0008              | 0.0002               | 0.0082                | ND                | 0.0027                 |
| 6-6-1-0       | 0.0196               | ND                  | 0.0122               | 0.0044               | ND                     | 0.1015             | 0.0080              | 0.0038               | 0.0234                | 0.0147            | 0.0229                 |
| 6-6-1-1       | 0.0391               | 0.0319              | 0.0197               | 0.0219               | 0.1055                 | 0.1033             | 0.0213              | 0.0214               | 0.1016                | 0.0323            | 0.0769                 |
| 7-4-1-0       | ND                   | 0.5382              | 0.0003               | 0.0004               | 0.0383                 | 0.0042             | 0.0022              | 0.0004               | 0.0076                | 0.0019            | 0.0009                 |
| 7-4-1-1       | ND                   | 0.0015              | ND                   | 0.0020               | 0.0131                 | ND                 | 0.0010              | 0.0009               | ND                    | ND                | 0.0024                 |
| 7-5-0-0       | 0.0287               | ND                  | 0.1730               | 0.0596               | ND                     | ND                 | 0.1276              | 0.0220               | 0.6309                | 0.0039            | 0.0023                 |
| 7-5-1-0       | ND                   | 0.0248              | 0.0045               | 0.0046               | 0.0014                 | 0.0193             | 0.0006              | 0.0017               | ND                    | 0.0017            | 0.0024                 |
| 7-6-1-1       | 0.0040               | 0.0441              | 0.0012               | 0.0011               | 0.0141                 | 0.0104             | 0.0034              | 0.0024               | 0.0140                | 0.0012            | 0.0108                 |
| 7-6-1-2       | 0.2754               | 0.3000              | 0.0348               | 0.0163               | 0.2091                 | 0.1971             | 0.0201              | 0.0049               | 0.1291                | ND                | ND                     |
| 7-6-1-3       | ND                   | 0.0328              | ND                   | 0.0063               | 0.0079                 | 0.0101             | 0.0324              | 0.0150               | 0.0533                | 0.0140            | 0.0320                 |
| 7-7-0-1       | 0.0661               | ND                  | 0.0232               | 0.0323               | ND                     | 0.0021             | 0.0128              | 0.0049               | ND                    | 0.0016            | ND                     |
| 7-7-1-0       | 0.0212               | 0.2248              | 0.0113               | 0.0209               | 0.1270                 | 0.0132             | 0.0121              | 0.0017               | 0.0291                | ND                | 0.0498                 |
| 7-7-1-1       | 0.0137               | 0.1284              | 0.0140               | 0.0182               | 0.0194                 | 0.0286             | 0.0130              | 0.0016               | ND                    | 0.0134            | 0.0008                 |
| 7-7-1-2       | 0.0046               | 0.0708              | 0.0046               | 0.0041               | 0.0535                 | 0.0092             | 0.0201              | 0.0105               | ND                    | ND                | 0.0139                 |
| 7-7-1-3       | 0.0006               | 0.0271              | 0.0016               | 0.0019               | 0.0060                 | ND                 | 0.0120              | 0.0050               | 0.0052                | 0.0020            | 0.0126                 |
| 7-8-1-1       | 0.0485               | 0.3781              | 0.0224               | 0.0720               | 0.3016                 | ND                 | 0.0151              | 0.0168               | ND                    | ND                | 0.1154                 |
| 7-8-1-2       | 0.0020               | 0.0012              | 0.0016               | 0.0004               | 0.0028                 | ND                 | 0.0056              | 0.0012               | ND                    | 0.0013            | 0.0018                 |
| 8-6-1-0       | ND                   | ND                  | ND                   | ND                   | ND                     | ND                 | ND                  | 0.0515               | ND                    | ND                | ND                     |
| 8-6-1-1       | ND                   | 0.0199              | ND                   | 0.0009               | ND                     | ND                 | 0.0012              | 0.0002               | ND                    | ND                | 0.0021                 |
| 8-8-0-0       | 0.0094               | ND                  | 0.0136               | ND                   | ND                     | ND                 | ND                  | 0.0016               | ND                    | ND                | ND                     |
| 8-8-1-2       | 0.0495               | 0.0070              | ND                   | ND                   | ND                     | 0.1133             | ND                  | 0.0133               | ND                    | ND                | 0.0285                 |
| 8-9-0-2       | 0.0094               | ND                  | 0.0190               | ND                   | ND                     | 0.0342             | ND                  | 0.0053               | ND                    | 0.0128            | 0.0302                 |

**Supplementary Table S3.** Relative abundance of the identified isomeric *N*-glycans. A four-digit *N*-glycan nomenclature was used in the following order: *N*-acetylglucosamine, Hexose, Fucose, *N*-acetylneuraminic acid (GlcNAc,Hex,Fuc,NeuAc), and I = isomer.

| Glycan       | H12<br>Alpha | H15<br>Beta | H14<br>Gamma | H23<br>Delta | H17<br>Epsilon | H29<br>Eta | H28<br>Iota | H1B<br>Kappa | H32<br>Lambda | H38 Mu | H41<br>Omicron |
|--------------|--------------|-------------|--------------|--------------|----------------|------------|-------------|--------------|---------------|--------|----------------|
| 2-8-0-0, I-1 | ND           | ND          | ND           | ND           | ND             | ND         | ND          | 0.0211       | ND            | ND     | 0.0015         |
| 2-8-0-0, I-2 | ND           | ND          | ND           | ND           | ND             | ND         | ND          | 0.0101       | ND            | ND     | 0.0512         |
| 2-8-0-0, I-3 | ND           | ND          | ND           | 0.0617       | ND             | ND         | 0.0063      | 0.0080       | ND            | ND     | ND             |
| 3-4-0-1, I-1 | ND           | ND          | ND           | ND           | ND             | ND         | ND          | ND           | ND            | 1.1054 | ND             |
| 3-4-0-1, I-2 | 0.1979       | 0.2824      | 0.4202       | 0.3243       | 0.6072         | 0.3703     | 0.2617      | 0.3195       | ND            | 1.0421 | 0.1064         |
| 3-4-0-1, I-3 | 0.0320       | 0.1964      | 0.1877       | 0.1598       | 0.5510         | 0.5475     | 0.1549      | 0.0783       | 1.0122        | ND     | ND             |
| 3-4-0-1, I-4 | ND           | ND          | ND           | ND           | ND             | 0.3838     | ND          | ND           | 0.6667        | ND     | ND             |
| 3-4-1-1      | 0.0477       | ND          | 0.2616       | 0.2623       | ND             | ND         | 0.1221      | 0.4624       | 0.4736        | 0.6042 | ND             |
| 3-5-0-0, I-1 | ND           | 0.0191      | ND           | ND           | ND             | ND         | ND          | ND           | ND            | 0.0061 | ND             |
| 3-5-0-0, I-2 | 0.0015       | 0.0215      | ND           | 0.0253       | ND             | ND         | 0.0015      | 0.0061       | 0.0008        | ND     | 0.0248         |
| 3-5-0-0, I-3 | ND           | ND          | ND           | 0.0110       | ND             | ND         | 0.0002      | ND           | ND            | ND     | 0.0050         |
| 3-5-0-1, I-1 | ND           | ND          | ND           | ND           | 0.8208         | ND         | ND          | ND           | 0.7763        | ND     | ND             |
| 3-5-0-1, I-2 | ND           | ND          | ND           | ND           | ND             | ND         | ND          | ND           | ND            | ND     | 0.0342         |
| 3-5-0-1, I-3 | ND           | ND          | ND           | ND           | 0.2199         | ND         | ND          | ND           | 0.2834        | ND     | 0.0465         |
| 3-5-0-1, I-4 | 0.3570       | ND          | 0.8169       | 0.1685       | 0.0937         | 0.2979     | 0.5263      | 0.0750       | ND            | ND     | 0.1633         |
| 3-5-0-1, I-5 | 1.3702       | ND          | ND           | 0.2453       | ND             | ND         | 0.3117      | 0.0951       | 1.1360        | 1.7300 | ND             |
| 3-5-0-1, I-6 | 0.1617       | ND          | ND           | 0.1563       | ND             | ND         | 0.0451      | 0.4280       | ND            | ND     | ND             |
| 3-5-0-1, I-7 | 0.6642       | ND          | 0.7484       | 0.3578       | ND             | 0.4470     | 0.2243      | ND           | 1.4023        | ND     | ND             |
| 3-5-0-1, I-8 | ND           | ND          | 0.3905       | 0.5622       | ND             | ND         | 0.2317      | ND           | 0.5079        | ND     | ND             |
| 3-5-1-0, I-1 | ND           | ND          | ND           | ND           | ND             | ND         | ND          | ND           | ND            | 0.3935 | ND             |
| 3-5-1-0, I-2 | 0.0869       | 0.1793      | 0.1428       | 0.1082       | 0.2110         | ND         | 0.0832      | 0.1930       | 0.3439        | 0.1346 | 0.0486         |
| 3-5-1-0, I-3 | 0.0070       | 0.0771      | 0.0506       | 0.0487       | 0.2034         | 0.1576     | 0.0267      | 0.0512       | 0.1784        | ND     | 0.0475         |
| 3-5-1-0, I-4 | ND           | ND          | ND           | ND           | ND             | 0.1020     | ND          | ND           | ND            | ND     | ND             |
| 3-5-1-1, I-1 | ND           | ND          | ND           | ND           | ND             | ND         | ND          | ND           | ND            | ND     | 0.0501         |
| 3-5-1-1, I-2 | 0.1292       | 0.3722      | 0.3869       | 0.4248       | 0.1621         | 0.1446     | 0.3750      | 0.7316       | 0.5401        | 0.4626 | 0.2229         |
| 3-5-1-1, I-3 | 0.2373       | 0.3882      | 0.4745       | 0.3251       | 0.4802         | ND         | 0.2591      | 0.6682       | 0.7720        | 0.4665 | ND             |
| 3-6-0-1, I-1 | ND           | 0.0072      | ND           | 0.0667       | ND             | ND         | 0.0323      | 0.0866       | ND            | ND     | 0.0594         |
| 3-6-0-1, I-2 | ND           | ND          | ND           | ND           | ND             | ND         | ND          | ND           | 0.1285        | ND     | ND             |
| 3-6-0-1, I-3 | ND           | ND          | ND           | ND           | ND             | ND         | ND          | ND           | 0.3081        | ND     | ND             |
| 3-6-1-0, I-1 | ND           | 0.3689      | ND           | ND           | ND             | ND         | ND          | ND           | 0.3894        | ND     | ND             |
| 3-6-1-0, I-2 | ND           | 2.2033      | ND           | ND           | ND             | ND         | ND          | ND           | ND            | ND     | ND             |
| 3-6-1-0, I-3 | 0.5566       | 0.2328      | ND           | ND           | ND             | ND         | ND          | 0.1996       | ND            | ND     | 0.0595         |
| 3-6-1-0, I-4 | 0.0691       | ND          | ND           | ND           | ND             | ND         | ND          | 0.1555       | ND            | 1.7463 | 0.0846         |
| 3-6-1-0, I-5 | 0.1217       | 0.4598      | ND           | 0.3683       | 0.7213         | 0.3827     | 0.2680      | 0.4365       | 1.4687        | ND     | ND             |
| 3-6-1-1, I-1 | ND           | 0.0120      | 0.4121       | 0.1501       | 0.0342         | ND         | 0.0860      | 0.3582       | 0.5078        | 0.4518 | ND             |
| 3-6-1-1, I-2 | ND           | 0.2079      | 0.4753       | 0.2043       | 0.1413         | 0.7962     | 0.1242      | 0.3705       | 0.5184        | 0.1862 | ND             |
| 3-7-1-0, I-1 | ND           | ND          | ND           | 0.0130       | ND             | ND         | ND          | 0.0031       | ND            | ND     | 0.0086         |
| 3-7-1-0, I-2 | 0.0077       | ND          | ND           | 0.0200       | ND             | ND         | ND          | 0.0068       | 0.0161        | ND     | ND             |
| 3-7-1-0, I-3 | ND           | ND          | ND           | ND           | ND             | ND         | ND          | ND           | 0.0248        | ND     | ND             |
| 3-8-0-0      | 0.1991       | 0.0635      | 0.2678       | 0.3190       | 0.0460         | 0.2828     | 0.2729      | 0.2993       | 0.4099        | 0.9186 | ND             |
| 4-4-0-1, I-1 | 0.3890       | ND          | ND           | 0.2912       | ND             | ND         | 0.9158      | 0.0445       | 2.5116        | ND     | 2.0946         |
| 4-4-0-1, I-2 | 5.7141       | 2.3768      | 1.2587       | 1.7082       | 4.0557         | ND         | 1.4984      | 1.4086       | ND            | 0.4972 | 0.2060         |
| 4-4-0-1, I-3 | 0.4066       | ND          | ND           | 0.2580       | ND             | ND         | 0.4163      | ND           | ND            | ND     | ND             |
| 4-4-0-1, I-4 | ND           | ND          | 0.0662       | ND           | ND             | ND         | ND          | ND           | ND            | ND     | ND             |
| 4-4-0-1, I-5 | 0.0411       | ND          | 0.1017       | 0.0177       | ND             | ND         | 0.0474      | 0.0566       | ND            | ND     | 0.0513         |
| 4-4-0-1, I-6 | 0.0232       | ND          | 0.2156       | 0.0751       | ND             | 0.1719     | 0.1168      | 0.3864       | ND            | ND     | ND             |
| 4-4-1-0, I-1 | ND           | ND          | ND           | 0.0440       | ND             | ND         | 0.0405      | 0.0009       | ND            | ND     | 0.0129         |
| 4-4-1-0, I-2 | ND           | ND          | ND           | 0.0090       | ND             | ND         | 0.0328      | 0.1076       | ND            | ND     | ND             |
| 4-4-1-0, I-3 | 0.9470       | ND          | ND           | ND           | ND             | ND         | ND          | 0.0323       | 0.5651        | 2.0833 | 0.8794         |
| 4-4-1-0, I-4 | 0.0081       | 3.5341      | 0.4229       | 0.4658       | 6.7162         | 2.6718     | 1.4073      | 0.0546       | ND            | ND     | 0.0268         |
| 4-4-1-0, I-5 | ND           | ND          | ND           | ND           | 0.1827         | ND         | ND          | ND           | 1.1741        | ND     | 0.0089         |
| 4-4-1-0, I-6 | ND           | 0.1266      | ND           | ND           | 0.2589         | ND         | ND          | ND           | ND            | 0.3428 | ND             |
| 4-4-1-0, I-7 | ND           | ND          | ND           | ND           | ND             | ND         | ND          | ND           | ND            | 1.3329 | ND             |
| 4-4-1-0, I-8 | ND           | ND          | ND           | ND           | ND             | ND         | ND          | ND           | ND            | 0.4113 | ND             |
| 4-4-1-1, I-1 | ND           | ND          | ND           | ND           | ND             | ND         | ND          | ND           | 0.2117        | ND     | ND             |
| 4-4-1-1, I-2 | ND           | ND          | ND           | ND           | ND             | ND         | ND          | ND           | 0.0915        | ND     | 0.4307         |
| 4-4-1-1, I-3 | 0.1682       | 0.4107      | 0.3865       | 0.0777       | 1.6795         | ND         | 0.2021      | 0.7824       | 0.7784        | 1.6171 | 2.9188         |
| 4-4-1-1, I-4 | 2.7153       | 2.1082      | 1.2163       | 0.3936       | 0.8810         | 1.1569     | 1.0262      | 3.0608       | ND            | 0.8259 | ND             |
| 4-4-2-1, I-1 | ND           | ND          | ND           | ND           | ND             | ND         | ND          | ND           | ND            | 0.0915 | ND             |

**Supplementary Table S3. Continued...**

| Glycan        | H12<br>Alpha | H15<br>Beta | H14<br>Gamma | H23<br>Delta | H17<br>Epsilon | H29<br>Eta | H28<br>Iota | H1B<br>Kappa | H32<br>Lambda | H38 Mu | H41<br>Omicron |
|---------------|--------------|-------------|--------------|--------------|----------------|------------|-------------|--------------|---------------|--------|----------------|
| 4-4-2-1, I-2  | 0.0290       | 0.2848      | ND           | 0.2494       | ND             | ND         | 0.2315      | 0.0617       | 0.2154        | ND     | 0.5218         |
| 4-4-2-1, I-3  | 0.0222       | 0.2958      | ND           | 0.7501       | ND             | 0.2323     | 0.3031      | 0.0883       | ND            | ND     | ND             |
| 4-4-2-1, I-4  | ND           | ND          | ND           | 0.1200       | ND             | 0.3298     | ND          | ND           | ND            | ND     | 0.3615         |
| 4-4-2-1, I-5  | 0.0249       | ND          | ND           | 0.3314       | ND             | ND         | ND          | 0.0864       | 0.2511        | 0.2237 | 0.4533         |
| 4-4-2-1, I-6  | 0.1366       | 0.1657      | 0.1560       | 0.6832       | ND             | ND         | 0.2218      | 0.1547       | ND            | ND     | 0.2686         |
| 4-4-2-1, I-7  | 0.7103       | 0.0358      | 0.5966       | 1.7362       | ND             | ND         | 0.5730      | 1.9275       | ND            | ND     | ND             |
| 4-4-2-1, I-8  | 0.0654       | 0.2170      | 0.3013       | 1.2989       | ND             | 0.7033     | 0.5438      | 0.7440       | ND            | 0.6169 | ND             |
| 4-4-2-1, I-9  | 0.1206       | ND          | 0.2621       | 0.7129       | ND             | ND         | 0.3334      | 0.2889       | ND            | ND     | ND             |
| 4-5-0-0, I-1  | 0.1064       | ND          | ND           | 0.1600       | ND             | ND         | 0.1163      | 0.0054       | ND            | ND     | 0.2585         |
| 4-5-0-0, I-2  | 0.0325       | ND          | 0.1204       | ND           | ND             | ND         | ND          | 0.0753       | ND            | ND     | ND             |
| 4-5-0-0, I-3  | ND           | ND          | ND           | 0.0974       | ND             | ND         | 0.2712      | ND           | ND            | ND     | 0.0339         |
| 4-5-0-0, I-4  | 0.0273       | ND          | ND           | 0.0542       | ND             | ND         | 0.2051      | 0.0447       | ND            | ND     | ND             |
| 4-5-0-0, I-5  | 0.0396       | ND          | 0.0882       | 0.0188       | ND             | ND         | 0.0350      | 0.2483       | ND            | ND     | ND             |
| 4-5-0-0, I-6  | ND           | ND          | ND           | 0.0617       | ND             | ND         | 0.0732      | ND           | ND            | ND     | ND             |
| 4-5-0-1, I-1  | ND           | ND          | ND           | ND           | ND             | ND         | ND          | ND           | ND            | ND     | 0.0793         |
| 4-5-0-1, I-2  | ND           | ND          | ND           | ND           | ND             | ND         | ND          | ND           | ND            | ND     | 0.0848         |
| 4-5-0-1, I-3  | ND           | ND          | ND           | ND           | ND             | ND         | ND          | ND           | ND            | ND     | 0.0639         |
| 4-5-0-1, I-4  | ND           | ND          | ND           | ND           | ND             | ND         | ND          | ND           | ND            | ND     | 0.0360         |
| 4-5-0-1, I-5  | ND           | ND          | ND           | ND           | ND             | ND         | ND          | ND           | ND            | ND     | 0.4382         |
| 4-5-0-1, I-6  | ND           | ND          | ND           | ND           | ND             | 4.5445     | ND          | ND           | ND            | ND     | 0.7428         |
| 4-5-0-1, I-7  | ND           | ND          | ND           | ND           | ND             | ND         | ND          | ND           | ND            | ND     | 0.0767         |
| 4-5-0-1, I-8  | ND           | ND          | ND           | 0.1353       | ND             | ND         | 0.0734      | ND           | ND            | ND     | 0.0401         |
| 4-5-0-2, I-1  | ND           | ND          | ND           | ND           | ND             | ND         | ND          | ND           | ND            | ND     | 0.1145         |
| 4-5-0-2, I-2  | ND           | 0.2477      | ND           | ND           | ND             | ND         | ND          | ND           | ND            | ND     | 0.0928         |
| 4-5-0-2, I-3  | ND           | ND          | ND           | ND           | ND             | ND         | ND          | ND           | ND            | ND     | 0.0681         |
| 4-5-0-2, I-4  | ND           | ND          | ND           | ND           | ND             | ND         | ND          | ND           | ND            | ND     | 0.2228         |
| 4-5-0-2, I-5  | ND           | ND          | ND           | 0.5827       | 3.6608         | 0.3710     | ND          | ND           | ND            | 0.2451 | 0.3520         |
| 4-5-1-0, I-1  | 0.0608       | ND          | ND           | 0.3647       | 0.0925         | ND         | 0.2420      | 0.0436       | ND            | ND     | 0.0875         |
| 4-5-1-0, I-2  | 5.9230       | ND          | ND           | 1.7818       | ND             | ND         | 1.5283      | 1.5729       | ND            | 3.1226 | 2.2667         |
| 4-5-1-0, I-3  | 0.3776       | 2.5607      | 1.3191       | 0.1855       | 4.2826         | ND         | 0.2457      | 0.0653       | ND            | ND     | 0.3037         |
| 4-5-1-0, I-4  | ND           | ND          | ND           | ND           | ND             | 2.4542     | ND          | ND           | 2.4571        | ND     | ND             |
| 4-5-1-0, I-5  | ND           | ND          | ND           | ND           | 0.1613         | ND         | ND          | ND           | ND            | 0.5998 | 0.0546         |
| 4-5-1-0, I-6  | ND           | ND          | ND           | ND           | 0.1074         | ND         | ND          | ND           | ND            | ND     | ND             |
| 4-5-1-1, I-1  | ND           | ND          | ND           | ND           | ND             | ND         | ND          | 0.1493       | ND            | ND     | 3.0228         |
| 4-5-1-1, I-2  | 2.6568       | 4.0340      | 2.4291       | 2.1906       | 1.9123         | ND         | 2.4947      | 3.5537       | 2.6921        | 4.1878 | 4.4920         |
| 4-5-1-1, I-3  | 0.4237       | 5.1342      | 0.3859       | 0.4401       | 5.1709         | ND         | 0.3204      | ND           | ND            | 5.3384 | 0.0258         |
| 4-5-1-1, I-4  | 3.1399       | ND          | 2.6055       | 2.9864       | ND             | 0.6766     | 2.7232      | 3.1190       | 3.6058        | ND     | ND             |
| 4-5-1-1, I-5  | ND           | ND          | ND           | ND           | ND             | 0.9466     | ND          | ND           | ND            | ND     | ND             |
| 4-5-1-1, I-6  | ND           | ND          | ND           | 0.2365       | ND             | ND         | ND          | ND           | ND            | ND     | 0.1730         |
| 4-5-1-2, I-1  | ND           | ND          | ND           | ND           | ND             | ND         | ND          | ND           | 0.2242        | 0.2003 | ND             |
| 4-5-1-2, I-2  | ND           | ND          | ND           | ND           | ND             | ND         | ND          | ND           | 0.2371        | ND     | ND             |
| 4-5-1-2, I-3  | ND           | ND          | ND           | ND           | ND             | ND         | ND          | ND           | ND            | 0.3534 | ND             |
| 4-5-1-2, I-4  | ND           | ND          | ND           | ND           | ND             | ND         | ND          | ND           | ND            | 0.9255 | ND             |
| 4-5-1-2, I-5  | ND           | ND          | ND           | ND           | ND             | ND         | ND          | ND           | ND            | ND     | 0.1405         |
| 4-5-1-2, I-6  | 0.0312       | ND          | 0.0918       | 0.1091       | ND             | ND         | 0.2108      | 0.1311       | ND            | ND     | 2.1375         |
| 4-5-1-2, I-7  | 0.3700       | 2.2260      | 1.2009       | 1.4896       | 0.5189         | ND         | 1.0969      | 1.6038       | 1.0161        | 0.8444 | 3.7853         |
| 4-5-1-2, I-8  | 0.4227       | 1.8821      | 1.3059       | 1.8974       | 0.6064         | 0.7392     | 0.9809      | 1.0626       | 0.7542        | 0.6716 | 0.0154         |
| 4-5-1-2, I-9  | ND           | ND          | ND           | ND           | ND             | 0.6457     | ND          | ND           | ND            | ND     | 0.0920         |
| 4-5-1-2, I-10 | ND           | ND          | ND           | ND           | ND             | ND         | ND          | ND           | ND            | ND     | 0.1905         |
| 4-5-2-0, I-1  | ND           | ND          | ND           | ND           | ND             | ND         | ND          | ND           | ND            | ND     | 0.0691         |
| 4-5-2-0, I-2  | ND           | ND          | ND           | ND           | ND             | ND         | ND          | ND           | ND            | ND     | 0.0823         |
| 4-5-2-0, I-3  | 0.5634       | 0.4603      | 0.2310       | ND           | 0.3236         | ND         | ND          | 0.9708       | ND            | 1.9495 | 3.2342         |
| 4-5-2-0, I-4  | 3.8086       | 0.9297      | 1.0833       | 0.2426       | 0.8648         | ND         | 0.4091      | 3.4995       | ND            | ND     | ND             |
| 4-5-2-0, I-5  | 0.3348       | ND          | 0.9687       | 1.7378       | ND             | ND         | 0.9953      | ND           | ND            | ND     | ND             |
| 4-5-2-0, I-6  | ND           | ND          | 0.1186       | 0.7696       | ND             | 1.3475     | 0.8987      | ND           | ND            | ND     | ND             |
| 4-5-2-0, I-7  | ND           | ND          | 0.2186       | 0.2915       | ND             | ND         | 0.3220      | ND           | ND            | ND     | ND             |
| 4-5-2-0, I-8  | ND           | ND          | ND           | ND           | ND             | ND         | ND          | ND           | 0.5070        | ND     | ND             |
| 4-5-2-1, I-1  | 0.1163       | ND          | 0.5272       | ND           | ND             | ND         | ND          | 1.7067       | ND            | ND     | 0.0162         |
| 4-5-2-1, I-2  | ND           | ND          | ND           | ND           | ND             | ND         | ND          | ND           | ND            | ND     | 0.1024         |
| 4-5-2-1, I-3  | ND           | ND          | ND           | ND           | ND             | ND         | ND          | ND           | ND            | ND     | 0.1010         |
| 4-5-2-1, I-4  | ND           | ND          | ND           | ND           | ND             | ND         | ND          | ND           | ND            | 1.2208 | 1.4319         |
| 4-5-2-1, I-5  | ND           | 0.1315      | ND           | ND           | 0.1013         | ND         | ND          | ND           | ND            | 1.9853 | 1.9826         |

**Supplementary Table S3. Continued...**

| Glycan        | H12<br>Alpha | H15<br>Beta | H14<br>Gamma | H23<br>Delta | H17<br>Epsilon | H29<br>Eta | H28<br>Iota | H1B<br>Kappa | H32<br>Lambda | H38 Mu | H41<br>Omicron |
|---------------|--------------|-------------|--------------|--------------|----------------|------------|-------------|--------------|---------------|--------|----------------|
| 4-5-2-1, I-6  | 0.4579       | 0.3579      | 1.0268       | 1.1689       | 0.4697         | 0.4715     | 0.4670      | 2.0425       | 0.5114        | ND     | 0.1307         |
| 4-5-2-1, I-7  | 0.7766       | 0.0421      | 0.0819       | 2.1980       | ND             | 0.7888     | 0.7722      | 0.0903       | 0.9767        | ND     | ND             |
| 4-5-2-1, I-8  | ND           | ND          | ND           | 0.1477       | ND             | ND         | 0.0669      | ND           | ND            | ND     | ND             |
| 4-5-2-1, I-9  | ND           | ND          | ND           | ND           | ND             | ND         | ND          | ND           | ND            | ND     | 0.0584         |
| 4-5-2-1, I-10 | ND           | ND          | ND           | ND           | ND             | ND         | ND          | ND           | ND            | ND     | 0.0718         |
| 4-5-2-1, I-11 | 0.0238       | ND          | ND           | ND           | ND             | ND         | ND          | 0.0290       | ND            | ND     | ND             |
| 4-5-2-1, I-12 | 0.0250       | ND          | ND           | 0.0683       | ND             | ND         | ND          | 0.0460       | ND            | ND     | ND             |
| 4-5-3-0, I-1  | ND           | ND          | 1.0583       | 0.3443       | ND             | 7.3049     | 0.1150      | 0.6164       | 2.8884        | ND     | ND             |
| 4-5-3-0, I-2  | ND           | ND          | 1.5472       | 0.7242       | ND             | 1.1321     | 0.8058      | 0.6049       | 3.5969        | ND     | ND             |
| 4-5-3-0, I-3  | ND           | ND          | 0.2679       | 1.0834       | 0.0453         | ND         | 1.0107      | ND           | ND            | ND     | ND             |
| 4-5-3-0, I-4  | ND           | ND          | 0.2777       | 0.1097       | 0.0866         | ND         | 0.1122      | ND           | ND            | ND     | ND             |
| 4-5-3-0, I-5  | 1.0300       | ND          | 0.6696       | 2.0534       | ND             | ND         | 0.6422      | 2.5108       | ND            | 0.9384 | ND             |
| 4-5-3-0, I-6  | ND           | ND          | 0.6555       | 1.2519       | ND             | 3.4014     | 0.6218      | 0.9359       | ND            | ND     | ND             |
| 4-5-3-0, I-7  | ND           | ND          | 0.4113       | 0.7014       | ND             | ND         | 0.3553      | 0.3253       | ND            | ND     | ND             |
| 4-6-0-1, I-1  | ND           | ND          | ND           | ND           | ND             | ND         | ND          | ND           | 0.9033        | ND     | ND             |
| 4-6-0-1, I-2  | ND           | ND          | ND           | ND           | ND             | 0.4479     | ND          | ND           | 0.5045        | ND     | ND             |
| 4-6-0-1, I-3  | ND           | ND          | 0.4110       | 0.4170       | ND             | ND         | 0.0525      | 0.1134       | 0.2087        | ND     | 0.0939         |
| 4-6-1-0, I-1  | ND           | ND          | 0.0770       | 0.0616       | ND             | ND         | 0.3674      | 0.1396       | ND            | 0.3240 | ND             |
| 4-6-1-0, I-2  | 0.0844       | ND          | 0.1115       | 0.0844       | ND             | ND         | 0.0327      | 0.3042       | ND            | 0.4179 | ND             |
| 4-6-1-0, I-3  | ND           | ND          | 0.0459       | 0.0525       | ND             | ND         | 0.0343      | 0.0552       | 0.2447        | ND     | ND             |
| 4-6-1-1, I-1  | ND           | ND          | ND           | ND           | ND             | ND         | ND          | ND           | ND            | ND     | 0.0387         |
| 4-6-1-1, I-2  | ND           | ND          | ND           | ND           | ND             | ND         | ND          | ND           | ND            | ND     | 0.0557         |
| 4-6-1-1, I-3  | 0.0432       | ND          | 0.0461       | ND           | ND             | ND         | ND          | 0.0470       | 0.0657        | ND     | 0.0355         |
| 4-6-1-1, I-4  | 0.0626       | 0.0090      | 0.0457       | ND           | ND             | 0.0469     | ND          | 0.0233       | 0.0370        | ND     | 0.0067         |
| 4-6-1-1, I-5  | 0.1243       | ND          | ND           | ND           | ND             | ND         | ND          | ND           | ND            | 0.0871 | ND             |
| 4-6-1-1, I-6  | 0.1030       | ND          | ND           | ND           | ND             | ND         | ND          | ND           | ND            | ND     | ND             |
| 4-6-1-1, I-7  | 0.0390       | ND          | ND           | ND           | ND             | ND         | ND          | ND           | ND            | 0.0393 | ND             |
| 4-6-1-1, I-8  | 0.0536       | ND          | ND           | ND           | ND             | ND         | ND          | ND           | ND            | ND     | ND             |
| 4-6-1-1, I-9  | 0.0673       | ND          | ND           | ND           | ND             | ND         | ND          | ND           | ND            | ND     | ND             |
| 4-6-1-2, I-1  | ND           | ND          | 0.0466       | 0.0284       | ND             | ND         | 0.0378      | 0.0416       | ND            | ND     | ND             |
| 4-6-1-2, I-2  | 0.0516       | ND          | 0.0520       | 0.0331       | ND             | 0.1926     | 0.0202      | 0.0344       | ND            | ND     | 0.0621         |
| 4-6-1-2, I-3  | ND           | ND          | ND           | ND           | ND             | ND         | ND          | ND           | ND            | ND     | 0.0111         |
| 4-6-2-0, I-1  | ND           | ND          | ND           | ND           | ND             | ND         | ND          | ND           | ND            | ND     | 0.8529         |
| 4-6-2-0, I-2  | 0.7926       | 1.1264      | 0.5055       | 0.4590       | 0.3104         | 0.9144     | 0.5182      | 1.0558       | ND            | 0.9099 | 1.0329         |
| 4-6-2-0, I-3  | 0.8387       | 0.5328      | 0.4361       | 0.4487       | 0.8534         | ND         | 0.3886      | 0.8254       | ND            | ND     | ND             |
| 4-6-2-1, I-1  | ND           | ND          | ND           | ND           | ND             | ND         | ND          | ND           | ND            | ND     | 0.0458         |
| 4-6-2-1, I-2  | ND           | ND          | 0.0265       | ND           | ND             | ND         | 0.0629      | 0.0507       | ND            | ND     | 0.6244         |
| 4-6-2-1, I-3  | 0.1407       | 0.2776      | 0.3430       | 0.4274       | 0.1007         | ND         | 0.2887      | 0.5836       | 0.3013        | 0.1640 | 0.4890         |
| 4-6-2-1, I-4  | 0.0665       | 0.0380      | 0.1277       | 0.2094       | 0.0509         | 0.1623     | 0.0924      | 0.1778       | 0.0941        | 0.0633 | 0.0173         |
| 4-6-2-1, I-5  | ND           | ND          | ND           | ND           | ND             | 0.0586     | ND          | ND           | ND            | ND     | ND             |
| 4-7-1-0       | 0.1623       | ND          | 0.0781       | 0.7451       | ND             | ND         | 0.0905      | 0.0328       | ND            | 0.5302 | ND             |
| 5-3-1-0, I-1  | 0.0100       | 0.0699      | ND           | ND           | 0.1924         | 0.2133     | 0.1276      | 0.0929       | ND            | ND     | 0.0290         |
| 5-3-1-0, I-2  | ND           | 0.2536      | ND           | ND           | 0.7035         | 0.2929     | 0.1420      | ND           | ND            | 1.0557 | 0.0885         |
| 5-3-1-0, I-3  | 0.1181       | 2.1808      | 0.2366       | 0.0607       | 5.4914         | 1.4821     | 0.7209      | ND           | 0.4980        | ND     | 0.3763         |
| 5-3-1-0, I-4  | 0.3644       | 6.3807      | 0.8423       | 0.2980       | 7.5359         | 3.3152     | 2.2504      | ND           | ND            | 3.4889 | 0.4570         |
| 5-4-0-0, I-1  | ND           | ND          | ND           | ND           | ND             | ND         | ND          | 0.0172       | ND            | ND     | 0.0147         |
| 5-4-0-0, I-2  | ND           | ND          | ND           | 0.0155       | ND             | ND         | ND          | ND           | ND            | ND     | 0.0471         |
| 5-4-0-0, I-3  | 0.0184       | ND          | 0.1017       | 0.0394       | 0.0256         | ND         | 0.0737      | 0.2653       | 0.1452        | ND     | 0.1151         |
| 5-4-1-0, I-1  | 0.3467       | 0.4219      | 0.2209       | 0.2061       | 0.4456         | ND         | 0.7550      | 0.7482       | 0.2853        | ND     | 0.4097         |
| 5-4-1-0, I-2  | ND           | 0.4651      | 0.1572       | 0.1120       | 1.4146         | 0.7307     | 0.3315      | ND           | 0.4138        | ND     | 0.3177         |
| 5-4-1-0, I-3  | 0.2504       | 1.0082      | 0.1584       | 0.0354       | 0.7712         | ND         | ND          | 0.1659       | 1.5709        | ND     | 0.1564         |
| 5-4-1-0, I-4  | 0.2056       | ND          | 0.9386       | 0.1647       | 3.6006         | ND         | 0.4774      | 1.3062       | ND            | ND     | 0.7381         |
| 5-4-1-0, I-5  | 0.9145       | 3.4561      | ND           | 1.1608       | ND             | 1.9860     | 1.3772      | 0.0744       | ND            | ND     | 0.1413         |
| 5-4-1-1, I-1  | ND           | ND          | ND           | ND           | ND             | ND         | ND          | ND           | ND            | ND     | 0.0935         |
| 5-4-1-1, I-2  | ND           | ND          | ND           | ND           | ND             | ND         | ND          | ND           | ND            | ND     | 0.2460         |
| 5-4-1-1, I-3  | 0.0847       | 1.0937      | 0.2038       | 0.1320       | 0.3326         | ND         | 0.5354      | 0.6326       | ND            | ND     | 0.3185         |
| 5-4-1-1, I-4  | 0.1938       | 0.7893      | 0.2475       | 0.2185       | 0.0724         | 0.2520     | 0.4624      | 0.6079       | 0.2946        | ND     | 0.2351         |
| 5-4-1-1, I-5  | ND           | 0.1121      | 0.0785       | 0.0937       | 0.1517         | ND         | 0.1670      | 0.1976       | 0.3831        | 3.1603 | 0.0603         |
| 5-4-1-1, I-6  | ND           | 0.1485      | 0.0247       | ND           | 0.1473         | ND         | 0.1140      | ND           | ND            | ND     | ND             |
| 5-4-1-1, I-7  | 0.1110       | 0.1099      | 0.0371       | 0.0452       | ND             | 0.6545     | ND          | ND           | ND            | ND     | ND             |
| 5-4-1-1, I-8  | 0.1103       | ND          | 0.1296       | 0.1255       | 0.4272         | ND         | 0.2873      | ND           | ND            | ND     | ND             |
| 5-4-1-1, I-9  | ND           | ND          | 0.0245       | ND           | ND             | 0.3564     | 0.0673      | ND           | 0.1142        | 0.3945 | 0.0741         |

**Supplementary Table S3. Continued...**

| Glycan        | H12<br>Alpha | H15<br>Beta | H14<br>Gamma | H23<br>Delta | H17<br>Epsilon | H29<br>Eta | H28<br>Iota | H1B<br>Kappa | H32<br>Lambda | H38 Mu | H41<br>Omicron |
|---------------|--------------|-------------|--------------|--------------|----------------|------------|-------------|--------------|---------------|--------|----------------|
| 5-4-1-1, 1-10 | 0.0460       | 0.2727      | 0.1411       | 0.1911       | 0.1692         | ND         | 0.1894      | 0.2928       | ND            | ND     | 1.0157         |
| 5-4-1-1, 1-11 | 0.4361       | 0.2684      | 0.3212       | 1.2501       | 0.5768         | 0.1563     | 0.4591      | 1.8957       | 0.3086        | 0.9934 | ND             |
| 5-4-2-0, 1-1  | ND           | ND          | ND           | ND           | ND             | ND         | ND          | ND           | ND            | ND     | 2.0000         |
| 5-4-2-0, 1-2  | 1.1240       | 3.3122      | 1.3323       | 1.2564       | 4.6155         | ND         | 3.9434      | 5.5582       | 2.5502        | 1.8137 | ND             |
| 5-4-2-0, 1-3  | ND           | ND          | ND           | ND           | ND             | 2.5679     | ND          | ND           | ND            | ND     | ND             |
| 5-4-2-0, 1-4  | ND           | 0.4843      | 0.2458       | ND           | 0.3408         | ND         | ND          | ND           | ND            | ND     | ND             |
| 5-4-2-0, 1-5  | 0.2188       | 0.2665      | 0.2005       | 0.8397       | 0.2713         | 0.4215     | 0.3938      | 1.1206       | ND            | 0.2390 | ND             |
| 5-4-2-0, 1-6  | ND           | 0.1737      | ND           | ND           | ND             | ND         | ND          | ND           | ND            | ND     | ND             |
| 5-4-2-1, 1-1  | ND           | ND          | ND           | ND           | ND             | ND         | ND          | ND           | ND            | 0.4938 | 0.1241         |
| 5-4-2-1, 1-2  | ND           | 0.0383      | ND           | 0.1875       | 0.0501         | ND         | 0.1967      | 0.4449       | ND            | ND     | 1.4655         |
| 5-4-2-1, 1-3  | 0.4792       | 1.1160      | 1.5624       | 2.2950       | 0.9208         | 0.2342     | 2.5016      | 4.5444       | ND            | 2.5556 | ND             |
| 5-4-2-1, 1-4  | ND           | ND          | ND           | ND           | ND             | 1.6136     | ND          | ND           | ND            | ND     | ND             |
| 5-4-2-1, 1-5  | 0.2666       | ND          | 0.5676       | ND           | ND             | ND         | ND          | ND           | 0.4023        | 1.3382 | ND             |
| 5-4-2-1, 1-6  | 0.1974       | ND          | 0.3357       | ND           | ND             | 0.7450     | ND          | ND           | ND            | ND     | ND             |
| 5-4-2-1, 1-7  | 0.2267       | ND          | 0.1449       | ND           | ND             | ND         | ND          | ND           | ND            | ND     | ND             |
| 5-4-2-1, 1-8  | 0.2630       | ND          | ND           | ND           | ND             | ND         | ND          | ND           | ND            | ND     | ND             |
| 5-5-0-0, 1-1  | ND           | ND          | ND           | ND           | ND             | ND         | ND          | ND           | ND            | ND     | 0.0293         |
| 5-5-0-0, 1-2  | ND           | ND          | ND           | ND           | ND             | ND         | ND          | ND           | ND            | ND     | 0.3430         |
| 5-5-0-0, 1-3  | ND           | 0.1255      | 0.0639       | 0.1479       | ND             | ND         | 0.0915      | 0.4951       | 0.0614        | ND     | ND             |
| 5-5-0-1, 1-1  | 0.2643       | ND          | 0.5206       | 0.1011       | ND             | ND         | 1.0570      | ND           | ND            | 0.0521 | ND             |
| 5-5-0-1, 1-2  | ND           | ND          | ND           | ND           | ND             | ND         | ND          | ND           | ND            | ND     | ND             |
| 5-5-0-1, 1-3  | ND           | 1.7665      | ND           | ND           | ND             | ND         | ND          | ND           | ND            | ND     | ND             |
| 5-5-0-1, 1-4  | ND           | ND          | ND           | ND           | ND             | ND         | ND          | ND           | ND            | ND     | ND             |
| 5-5-1-0, 1-1  | ND           | ND          | ND           | ND           | ND             | ND         | ND          | ND           | ND            | ND     | 0.3768         |
| 5-5-1-0, 1-2  | ND           | ND          | ND           | ND           | ND             | ND         | ND          | ND           | ND            | ND     | 0.2445         |
| 5-5-1-0, 1-3  | 0.2047       | ND          | ND           | 0.3119       | 0.5860         | 0.6959     | 0.9010      | 3.2010       | 0.2868        | ND     | ND             |
| 5-5-1-0, 1-4  | ND           | ND          | ND           | ND           | ND             | ND         | ND          | ND           | ND            | ND     | 3.3137         |
| 5-5-1-0, 1-5  | 3.0507       | ND          | ND           | 0.0879       | ND             | ND         | 0.1640      | ND           | 4.1668        | 4.8535 | ND             |
| 5-5-1-0, 1-6  | ND           | 6.1993      | 2.0553       | 2.4382       | 4.3932         | 2.5575     | 2.3573      | 0.1746       | ND            | ND     | 0.0772         |
| 5-5-1-1, 1-1  | ND           | ND          | ND           | ND           | ND             | ND         | ND          | ND           | ND            | ND     | 0.1946         |
| 5-5-1-1, 1-2  | 0.1536       | 0.0443      | 0.1625       | ND           | ND             | 0.1784     | ND          | 0.1303       | 2.2238        | 0.5712 | 0.1370         |
| 5-5-1-1, 1-3  | ND           | ND          | ND           | ND           | 0.2104         | ND         | ND          | ND           | ND            | ND     | ND             |
| 5-5-1-1, 1-4  | ND           | ND          | ND           | ND           | 0.1963         | 0.3567     | ND          | ND           | ND            | 3.5642 | 2.2977         |
| 5-5-1-1, 1-5  | 1.5429       | 1.8165      | 1.6505       | 2.1293       | 1.2662         | 1.5510     | 1.3615      | 2.6184       | ND            | ND     | ND             |
| 5-5-2-0, 1-1  | ND           | 0.0137      | 0.0599       | ND           | ND             | 0.9931     | 0.0958      | 0.0525       | ND            | 1.1757 | 1.4527         |
| 5-5-2-0, 1-2  | 0.8937       | 1.1976      | ND           | 1.8570       | 0.3439         | ND         | 0.7172      | 2.2101       | ND            | ND     | 0.4563         |
| 5-5-2-0, 1-3  | 0.3409       | 0.2884      | 0.6766       | 0.4167       | ND             | ND         | 0.2697      | 0.2910       | ND            | ND     | ND             |
| 5-5-2-0, 1-4  | ND           | 0.0095      | 0.3034       | ND           | ND             | ND         | ND          | 0.0740       | 0.3792        | 0.6266 | ND             |
| 5-5-2-1, 1-1  | ND           | ND          | ND           | ND           | ND             | ND         | ND          | ND           | ND            | ND     | 0.0581         |
| 5-5-2-1, 1-2  | 0.1173       | 0.0594      | ND           | ND           | 0.1136         | 0.1906     | ND          | 0.0717       | ND            | ND     | 0.0862         |
| 5-5-2-1, 1-3  | ND           | ND          | ND           | ND           | ND             | 11.8703    | ND          | ND           | ND            | ND     | 0.2415         |
| 5-5-2-1, 1-4  | 0.2880       | 0.1845      | 0.3330       | 0.2783       | 0.0822         | ND         | 0.2369      | 0.2154       | ND            | ND     | 0.4403         |
| 5-5-2-1, 1-5  | 0.3967       | 0.1515      | 0.5113       | 0.4256       | 0.3250         | 0.4774     | 0.3251      | 0.2168       | ND            | 0.6294 | ND             |
| 5-5-2-1, 1-6  | ND           | ND          | ND           | ND           | ND             | ND         | ND          | ND           | 0.2796        | 0.6940 | 0.7213         |
| 5-5-2-1, 1-7  | 0.1662       | 0.0423      | 0.2474       | 0.8131       | 0.0233         | ND         | 0.1663      | 0.5916       | ND            | ND     | ND             |
| 5-5-3-0, 1-1  | ND           | ND          | ND           | ND           | ND             | ND         | ND          | ND           | ND            | ND     | 0.2957         |
| 5-5-3-0, 1-2  | 0.2760       | 0.0688      | 0.2206       | 1.5202       | 0.0995         | ND         | 0.2372      | 0.9523       | ND            | 0.5112 | ND             |
| 5-6-1-0, 1-1  | 0.1963       | ND          | 0.0610       | 0.0316       | 0.1761         | ND         | 0.0948      | 0.0464       | ND            | ND     | 0.1215         |
| 5-6-1-0, 1-2  | 0.0389       | 0.8333      | 0.0161       | ND           | ND             | ND         | ND          | 0.3837       | ND            | 0.4408 | 0.4439         |
| 5-6-1-0, 1-3  | ND           | ND          | 0.3523       | 0.4007       | 0.7598         | 0.4982     | 0.2585      | ND           | ND            | ND     | 0.0211         |
| 5-6-1-0, 1-4  | ND           | ND          | 0.0311       | ND           | ND             | ND         | ND          | ND           | 0.5957        | ND     | ND             |
| 5-6-1-0, 1-5  | 1.4352       | ND          | ND           | ND           | 0.2267         | ND         | ND          | 0.0107       | ND            | ND     | 0.0393         |
| 5-6-1-0, 1-6  | 0.0932       | 0.0110      | ND           | 0.0247       | 0.2555         | ND         | ND          | 0.0363       | ND            | ND     | ND             |
| 5-6-1-0, 1-7  | 0.0259       | ND          | 0.0146       | 0.0396       | 0.5994         | ND         | 0.0183      | 0.0193       | ND            | ND     | ND             |
| 5-6-1-1, 1-1  | ND           | ND          | ND           | ND           | ND             | ND         | ND          | ND           | ND            | ND     | 0.1694         |
| 5-6-1-1, 1-2  | 0.1427       | 0.1524      | 0.1486       | 0.0815       | 0.0480         | ND         | 0.1602      | 0.0941       | ND            | ND     | 0.5391         |
| 5-6-1-1, 1-3  | 0.4001       | 0.1578      | 0.3038       | 0.0816       | 0.2267         | ND         | 0.2986      | 0.1434       | ND            | ND     | 1.0043         |
| 5-6-1-1, 1-4  | 0.9648       | 0.6801      | 0.8007       | 0.1659       | 0.2555         | ND         | 0.6174      | 0.9234       | ND            | ND     | 1.7765         |
| 5-6-1-1, 1-5  | 1.6602       | 0.4217      | 1.2167       | 0.7720       | 0.5994         | ND         | 0.8039      | 0.8604       | ND            | ND     | 0.0936         |
| 5-6-1-1, 1-6  | 0.1133       | ND          | 0.0728       | 1.1523       | ND             | ND         | ND          | 0.0914       | ND            | ND     | ND             |
| 5-6-1-1, 1-7  | 0.1479       | ND          | ND           | ND           | ND             | ND         | ND          | ND           | ND            | ND     | 0.0871         |
| 5-6-1-1, 1-8  | 0.1459       | ND          | ND           | 0.0974       | ND             | ND         | ND          | ND           | ND            | ND     | 0.0973         |

**Supplementary Table S3. Continued...**

| Glycan        | H12<br>Alpha | H15<br>Beta | H14<br>Gamma | H23<br>Delta | H17<br>Epsilon | H29<br>Eta | H28<br>Iota | H1B<br>Kappa | H32<br>Lambda | H38 Mu | H41<br>Omicron |
|---------------|--------------|-------------|--------------|--------------|----------------|------------|-------------|--------------|---------------|--------|----------------|
| 5-6-1-2, I-1  | ND           | ND          | ND           | ND           | ND             | 0.2233     | ND          | ND           | ND            | ND     | 0.6493         |
| 5-6-1-2, I-2  | 0.1167       | 0.1610      | 0.2307       | 0.1452       | 0.0403         | ND         | 0.2384      | 0.1659       | ND            | ND     | 1.4369         |
| 5-6-1-2, I-3  | 0.2741       | 0.4628      | 0.4024       | 0.3426       | 0.3529         | 0.1853     | 0.4178      | 0.2663       | 0.5256        | 0.7881 | 0.5211         |
| 5-6-1-2, I-4  | 0.1084       | 0.0841      | 0.2230       | 0.2525       | 0.0684         | ND         | 0.1574      | 0.2099       | ND            | ND     | 1.6015         |
| 5-6-1-2, I-5  | 0.1811       | 0.0723      | 0.4463       | 0.5655       | 0.0262         | 0.3991     | 0.3145      | 0.3676       | 1.0775        | 1.7427 | 0.0977         |
| 5-6-1-2, I-6  | 0.2338       | 0.1266      | 0.5228       | 0.5139       | 0.3423         | ND         | 0.2494      | 0.2156       | ND            | ND     | 0.0485         |
| 5-6-1-2, I-7  | ND           | ND          | ND           | ND           | 0.0531         | 0.4373     | ND          | ND           | ND            | ND     | 0.5897         |
| 5-6-1-3, I-1  | ND           | ND          | ND           | ND           | ND             | 0.3607     | ND          | ND           | 0.1428        | ND     | ND             |
| 5-6-1-3, I-2  | ND           | ND          | ND           | ND           | ND             | 0.7931     | ND          | ND           | 0.3154        | ND     | ND             |
| 5-6-1-3, I-3  | ND           | ND          | ND           | ND           | ND             | 2.4515     | ND          | ND           | 2.1584        | ND     | ND             |
| 5-6-1-3, I-4  | ND           | ND          | ND           | ND           | ND             | ND         | ND          | ND           | 0.1761        | ND     | ND             |
| 5-6-1-3, I-5  | ND           | ND          | ND           | ND           | ND             | 0.7764     | ND          | ND           | 0.7738        | ND     | ND             |
| 5-6-1-3, I-6  | 0.0543       | 0.0752      | 0.1526       | 0.2214       | 0.0350         | ND         | ND          | 0.1400       | ND            | 0.1161 | 0.9821         |
| 5-6-1-3, I-7  | 0.0680       | 0.2620      | 0.2514       | 0.3634       | 0.0862         | ND         | 0.1656      | 0.1662       | 0.1236        | 0.1434 | 0.3092         |
| 5-6-1-3, I-8  | 0.0695       | 0.1192      | 0.3155       | 0.5516       | 0.0374         | ND         | 0.2082      | 0.3352       | ND            | 0.1925 | 2.0816         |
| 5-6-1-3, I-9  | 0.1163       | 0.3518      | 0.4510       | 0.8798       | 0.5043         | ND         | 0.2274      | 0.3055       | 0.3862        | 0.2575 | 0.0480         |
| 5-6-1-3, I-10 | 0.0260       | 0.0073      | ND           | 0.0858       | 0.0073         | ND         | 0.2680      | 0.0443       | 0.3920        | ND     | ND             |
| 5-6-1-3, I-11 | ND           | ND          | ND           | ND           | ND             | ND         | ND          | ND           | ND            | ND     | 0.2011         |
| 5-6-1-3, I-12 | 0.0112       | 0.0015      | ND           | 0.0462       | ND             | ND         | ND          | 0.0186       | ND            | ND     | ND             |
| 5-6-2-1, I-1  | 0.1636       | 0.0303      | ND           | 0.1768       | 0.0173         | 0.0849     | 0.1169      | 0.1144       | 0.4826        | ND     | 0.4541         |
| 5-6-2-1, I-2  | 0.1385       | 0.0326      | 0.1341       | 0.1895       | 0.0345         | ND         | 0.1352      | 0.1562       | ND            | ND     | 0.3018         |
| 5-6-2-1, I-3  | 0.1459       | 0.0280      | 0.1769       | 0.0787       | 0.0435         | ND         | 0.0674      | 0.0439       | ND            | ND     | 0.8634         |
| 5-6-2-1, I-4  | 0.0845       | 0.0204      | 0.0498       | 0.3434       | 0.0257         | ND         | 0.1056      | 0.2672       | ND            | 1.0383 | ND             |
| 5-6-2-1, I-5  | 0.4056       | 0.0855      | 0.4774       | 0.4804       | 0.0780         | 0.3547     | 0.1485      | 0.3352       | ND            | ND     | ND             |
| 5-6-2-2, I-1  | ND           | ND          | ND           | 0.1356       | ND             | ND         | 0.2155      | 0.2732       | ND            | ND     | ND             |
| 5-6-2-2, I-2  | ND           | ND          | ND           | 1.3754       | ND             | ND         | 0.7240      | 2.3018       | ND            | 1.3069 | ND             |
| 5-6-2-2, I-3  | ND           | ND          | ND           | 0.6069       | ND             | ND         | 0.7826      | 0.2614       | ND            | ND     | ND             |
| 5-6-2-2, I-4  | ND           | ND          | ND           | 0.1729       | ND             | ND         | 0.1311      | ND           | ND            | ND     | ND             |
| 5-6-2-2, I-5  | ND           | ND          | ND           | 0.2492       | ND             | ND         | 0.2850      | ND           | ND            | ND     | ND             |
| 5-6-2-2, I-6  | 0.0377       | ND          | ND           | ND           | ND             | ND         | ND          | ND           | ND            | ND     | 0.0455         |
| 5-6-2-2, I-7  | ND           | ND          | ND           | ND           | ND             | ND         | ND          | ND           | ND            | ND     | 0.0392         |
| 5-6-2-2, I-8  | ND           | ND          | ND           | ND           | ND             | ND         | ND          | ND           | ND            | ND     | 0.2528         |
| 5-6-2-2, I-9  | ND           | ND          | ND           | ND           | ND             | ND         | ND          | ND           | ND            | ND     | 0.5518         |
| 5-6-2-2, I-10 | 0.0613       | ND          | ND           | 0.2710       | ND             | ND         | ND          | ND           | ND            | ND     | 0.4778         |
| 5-6-2-2, I-11 | 0.0519       | ND          | ND           | 0.4371       | ND             | ND         | ND          | ND           | ND            | ND     | 0.0163         |
| 5-7-2-0, I-1  | ND           | ND          | ND           | ND           | ND             | ND         | ND          | ND           | ND            | 0.1131 | ND             |
| 5-7-2-0, I-2  | ND           | ND          | ND           | ND           | ND             | ND         | ND          | ND           | ND            | 0.0478 | ND             |
| 5-7-2-0, I-3  | ND           | ND          | ND           | ND           | ND             | ND         | ND          | ND           | ND            | ND     | 0.0277         |
| 5-7-2-0, I-4  | 0.0547       | 0.0208      | ND           | 0.0787       | ND             | ND         | ND          | 0.0202       | ND            | ND     | 0.0677         |
| 5-7-2-0, I-5  | 0.0790       | 0.0461      | ND           | 0.0327       | 0.0126         | ND         | 0.0384      | 0.0231       | ND            | ND     | 0.1626         |
| 5-7-2-0, I-6  | ND           | ND          | ND           | 0.0327       | ND             | ND         | 0.0475      | ND           | ND            | ND     | ND             |
| 5-7-2-0, I-7  | 0.2194       | 0.1569      | 0.1637       | 0.1658       | 0.0703         | ND         | 0.1164      | 0.1873       | ND            | 0.1439 | 0.1743         |
| 5-7-2-0, I-8  | 0.2643       | 0.0250      | 0.1681       | 0.1641       | 0.0282         | 0.1183     | 0.0972      | 0.1169       | 2.3825        | 0.0425 | 0.0156         |
| 5-7-2-0, I-9  | ND           | ND          | ND           | ND           | ND             | ND         | ND          | ND           | 0.1942        | ND     | 0.0135         |
| 5-7-2-0, I-10 | ND           | ND          | ND           | ND           | ND             | ND         | ND          | ND           | ND            | ND     | 0.0180         |
| 6-3-1-0, I-1  | 0.0076       | ND          | 0.0098       | 0.0137       | ND             | ND         | 0.1069      | 0.0956       | ND            | ND     | 0.0473         |
| 6-3-1-0, I-2  | ND           | 0.0198      | ND           | ND           | 0.0551         | 0.0459     | ND          | ND           | ND            | ND     | ND             |
| 6-3-1-0, I-3  | ND           | 0.0186      | ND           | ND           | 0.1028         | ND         | ND          | ND           | ND            | 0.0334 | 0.0153         |
| 6-3-1-0, I-4  | 0.0346       | 1.6030      | ND           | 0.0121       | 2.2270         | ND         | 0.0393      | ND           | 0.2627        | 0.2265 | 0.2703         |
| 6-3-1-0, I-5  | ND           | 0.0649      | 0.0078       | 0.0275       | 0.0456         | 0.6463     | 0.4791      | 0.0539       | ND            | 0.7357 | 0.0142         |
| 6-3-1-0, I-6  | ND           | 0.2897      | ND           | ND           | ND             | ND         | 0.0569      | ND           | ND            | ND     | ND             |
| 6-3-1-0, I-7  | ND           | ND          | ND           | ND           | 0.5926         | 0.2351     | 0.1583      | ND           | 0.0777        | ND     | 0.0436         |
| 6-3-1-0, I-8  | ND           | 0.1217      | ND           | ND           | 0.2284         | ND         | 0.1000      | ND           | 0.1039        | ND     | 0.0427         |
| 6-4-1-0, I-1  | 0.0614       | 0.0403      | ND           | 0.0184       | 0.7115         | 0.0347     | 0.3861      | 0.0205       | 0.4611        | ND     | 0.2154         |
| 6-4-1-0, I-2  | 0.0194       | 0.5818      | 0.1113       | 0.0318       | 0.0290         | 0.6430     | 0.0649      | 0.0916       | ND            | ND     | 0.0731         |
| 6-4-1-0, I-3  | ND           | ND          | ND           | ND           | ND             | ND         | ND          | ND           | 0.0891        | 0.1516 | 0.0325         |
| 6-4-1-0, I-4  | ND           | 0.0403      | ND           | ND           | 0.0775         | ND         | 0.0898      | ND           | ND            | ND     | ND             |
| 6-4-1-0, I-5  | ND           | 0.5818      | ND           | ND           | 0.1303         | ND         | 0.0492      | ND           | 0.1058        | 0.1648 | 0.0379         |
| 6-4-1-1, I-1  | ND           | ND          | ND           | ND           | ND             | ND         | ND          | ND           | ND            | ND     | 0.0615         |
| 6-4-1-1, I-2  | 0.0177       | 0.0977      | 0.0265       | 0.0104       | 0.0595         | 0.0875     | 0.1131      | 0.0410       | ND            | 0.0504 | ND             |
| 6-4-1-1, I-3  | ND           | ND          | ND           | ND           | ND             | ND         | ND          | ND           | ND            | ND     | 0.1282         |
| 6-4-1-1, I-4  | 0.0630       | 0.5932      | 0.1570       | 0.1542       | 0.2313         | 0.2096     | 0.2783      | 0.3004       | ND            | 0.2423 | 0.0251         |

**Supplementary Table S3. Continued...**

| Glycan        | H12<br>Alpha | H15<br>Beta | H14<br>Gamma | H23<br>Delta | H17<br>Epsilon | H29<br>Eta | H28<br>Iota | H1B<br>Kappa | H32<br>Lambda | H38 Mu | H41<br>Omicron |
|---------------|--------------|-------------|--------------|--------------|----------------|------------|-------------|--------------|---------------|--------|----------------|
| 6-4-1-1, I-5  | ND           | ND          | ND           | 0.0180       | ND             | ND         | ND          | ND           | ND            | ND     | 0.0240         |
| 6-4-1-1, I-6  | ND           | ND          | ND           | 0.0127       | ND             | ND         | ND          | ND           | ND            | ND     | 0.0114         |
| 6-4-2-0, I-1  | ND           | ND          | ND           | ND           | ND             | ND         | 0.0320      | ND           | ND            | ND     | 0.0107         |
| 6-4-2-0, I-2  | ND           | ND          | ND           | ND           | 0.0575         | ND         | ND          | ND           | ND            | ND     | 0.0392         |
| 6-4-2-0, I-3  | 0.0073       | 0.0611      | ND           | ND           | 0.0235         | 0.0446     | 0.0293      | 0.0049       | ND            | ND     | ND             |
| 6-4-2-0, I-4  | ND           | 0.0548      | ND           | 0.0479       | 0.0212         | ND         | 0.0504      | 0.0661       | 0.1930        | 0.0720 | ND             |
| 6-4-2-0, I-5  | 0.0096       | ND          | ND           | ND           | ND             | 0.0384     | ND          | ND           | ND            | ND     | ND             |
| 6-5-1-0, I-1  | ND           | ND          | ND           | ND           | ND             | ND         | ND          | ND           | ND            | ND     | 0.0238         |
| 6-5-1-0, I-2  | ND           | ND          | ND           | ND           | ND             | ND         | ND          | ND           | ND            | ND     | 0.1034         |
| 6-5-1-0, I-3  | 0.0878       | 0.4772      | 0.0875       | ND           | 0.2046         | ND         | ND          | 0.0938       | 0.1110        | 0.1638 | 0.0490         |
| 6-5-1-0, I-4  | 0.0404       | 0.2082      | ND           | 0.0484       | 0.0788         | 0.1220     | 0.1281      | ND           | 0.3421        | 0.5690 | 0.0842         |
| 6-5-1-0, I-5  | 0.0432       | ND          | ND           | ND           | 0.1690         | ND         | 0.2155      | ND           | ND            | ND     | 0.0092         |
| 6-5-1-0, I-6  | 0.0444       | 0.0610      | ND           | ND           | 0.0471         | ND         | ND          | ND           | ND            | 0.3025 | 0.0707         |
| 6-5-1-0, I-7  | 0.0267       | 0.0224      | ND           | 0.0253       | ND             | ND         | 0.0895      | 0.0271       | ND            | 0.1536 | 0.0722         |
| 6-5-1-0, I-8  | 0.0783       | 0.0913      | 0.1150       | 0.1391       | 0.0260         | ND         | 0.0357      | 0.1294       | 0.2733        | 0.3052 | 0.1471         |
| 6-5-1-0, I-9  | ND           | ND          | ND           | ND           | 0.1460         | 0.1310     | 0.1015      | ND           | ND            | ND     | ND             |
| 6-5-1-2, I-1  | ND           | ND          | ND           | ND           | ND             | ND         | ND          | ND           | ND            | ND     | 0.0488         |
| 6-5-1-2, I-2  | ND           | 0.0362      | ND           | 0.0275       | 0.0232         | ND         | 0.0752      | 0.0317       | 0.0599        | ND     | 0.0587         |
| 6-5-1-2, I-3  | ND           | 0.0208      | ND           | 0.0299       | 0.0286         | ND         | 0.0626      | 0.0255       | ND            | ND     | 0.0737         |
| 6-5-1-2, I-4  | 0.0615       | 0.0323      | ND           | 0.0737       | 0.0224         | ND         | 0.0891      | 0.0697       | ND            | ND     | 0.0618         |
| 6-5-1-2, I-5  | 0.0571       | 0.0367      | ND           | 0.0527       | 0.0135         | ND         | 0.0512      | 0.0392       | ND            | ND     | 0.0731         |
| 6-5-1-2, I-6  | 0.0592       | ND          | ND           | ND           | 0.0335         | 0.0677     | ND          | 0.0364       | 0.1106        | 0.1491 | 0.0998         |
| 6-5-1-2, I-7  | ND           | 0.0328      | ND           | ND           | 0.0389         | ND         | ND          | ND           | ND            | ND     | ND             |
| 6-5-1-2, I-8  | ND           | 0.0436      | ND           | ND           | 0.0511         | ND         | ND          | ND           | ND            | ND     | 0.0553         |
| 6-5-2-1, I-1  | ND           | 0.0690      | ND           | ND           | 0.1083         | ND         | ND          | ND           | ND            | ND     | 0.0161         |
| 6-5-2-1, I-2  | ND           | ND          | 0.0982       | ND           | 0.2339         | 0.2707     | 0.1661      | 0.0465       | ND            | ND     | 0.2327         |
| 6-5-2-1, I-3  | ND           | 0.3458      | ND           | ND           | 0.4218         | ND         | ND          | ND           | ND            | ND     | ND             |
| 6-5-2-1, I-4  | ND           | ND          | 0.1530       | 0.1433       | 0.0662         | 1.3449     | 0.3066      | 0.2329       | ND            | ND     | 0.0120         |
| 6-5-2-1, I-5  | 0.0999       | ND          | ND           | ND           | ND             | ND         | 0.4076      | ND           | ND            | ND     | ND             |
| 6-5-2-1, I-6  | 0.2665       | ND          | ND           | ND           | ND             | ND         | ND          | ND           | ND            | ND     | ND             |
| 6-5-2-1, I-7  | 0.7789       | 1.1638      | 0.7576       | 0.3822       | 1.2037         | 2.6360     | 1.1642      | 0.6059       | ND            | ND     | 1.3829         |
| 6-5-2-1, I-8  | 0.4871       | 0.7164      | 0.7764       | 0.3478       | 0.5835         | ND         | 0.5205      | 0.2392       | ND            | ND     | 0.4789         |
| 6-5-2-1, I-9  | 0.2765       | 0.6153      | ND           | 0.4155       | 0.1622         | ND         | 0.2402      | ND           | ND            | ND     | ND             |
| 6-5-2-1, I-10 | ND           | ND          | ND           | 0.2219       | ND             | 1.5092     | ND          | 0.1677       | ND            | ND     | ND             |
| 6-5-2-1, I-11 | ND           | 0.0433      | ND           | 0.2783       | 0.0752         | 0.6097     | ND          | 0.0754       | ND            | ND     | ND             |
| 6-5-2-1, I-12 | ND           | 0.0227      | ND           | ND           | ND             | ND         | ND          | 0.1800       | ND            | ND     | ND             |
| 6-5-2-1, I-13 | ND           | 0.0144      | ND           | ND           | 0.0402         | ND         | ND          | 0.0706       | ND            | ND     | ND             |
| 6-5-2-1, I-14 | ND           | ND          | ND           | ND           | ND             | ND         | ND          | 0.0533       | ND            | ND     | ND             |
| 6-5-3-0, I-1  | ND           | ND          | ND           | ND           | ND             | ND         | ND          | ND           | ND            | 1.1475 | ND             |
| 6-5-3-0, I-2  | ND           | ND          | ND           | ND           | ND             | ND         | ND          | ND           | 0.0866        | ND     | 0.1870         |
| 6-5-3-0, I-3  | ND           | ND          | 0.2841       | ND           | ND             | ND         | ND          | 0.1823       | 0.1844        | 0.9330 | ND             |
| 6-5-3-0, I-4  | ND           | 0.1424      | ND           | ND           | 0.1433         | ND         | ND          | ND           | 0.1991        | ND     | 0.0075         |
| 6-5-3-0, I-5  | 0.2558       | ND          | ND           | ND           | ND             | ND         | ND          | ND           | ND            | ND     | 0.1341         |
| 6-5-3-0, I-6  | 0.2060       | ND          | ND           | 0.2766       | ND             | ND         | ND          | 0.5535       | ND            | ND     | ND             |
| 6-5-3-0, I-7  | ND           | 0.3277      | ND           | 0.2864       | 0.2857         | ND         | 0.2774      | ND           | ND            | ND     | ND             |
| 6-5-3-0, I-8  | ND           | 0.0336      | ND           | ND           | 0.0294         | ND         | 0.2544      | ND           | ND            | ND     | ND             |
| 6-5-3-0, I-9  | ND           | 0.0398      | ND           | ND           | 0.0434         | ND         | ND          | ND           | ND            | ND     | ND             |
| 6-5-3-0, I-10 | ND           | 0.0221      | ND           | 0.1464       | 0.1019         | ND         | ND          | ND           | ND            | ND     | ND             |
| 6-5-4-0, I-1  | ND           | ND          | ND           | ND           | ND             | ND         | ND          | ND           | 0.0866        | ND     | ND             |
| 6-5-4-0, I-2  | ND           | ND          | ND           | ND           | ND             | ND         | ND          | ND           | ND            | ND     | 0.0640         |
| 6-5-4-0, I-3  | ND           | ND          | ND           | ND           | ND             | 0.3511     | ND          | 0.0755       | ND            | ND     | ND             |
| 6-5-4-0, I-4  | ND           | 0.0164      | ND           | ND           | ND             | ND         | ND          | 0.0819       | ND            | ND     | ND             |
| 6-5-4-0, I-5  | ND           | ND          | ND           | ND           | ND             | ND         | ND          | ND           | ND            | ND     | 0.0675         |
| 6-6-1-2, I-1  | 0.0714       | ND          | ND           | ND           | ND             | ND         | 0.0695      | ND           | 0.1097        | ND     | 0.1014         |
| 6-6-1-2, I-2  | 0.1266       | ND          | ND           | ND           | 0.0256         | ND         | 0.1004      | 0.3745       | 0.1441        | 0.2171 | 0.1118         |
| 6-6-1-2, I-3  | ND           | ND          | ND           | ND           | ND             | ND         | ND          | ND           | ND            | ND     | ND             |
| 6-6-1-2, I-4  | ND           | ND          | ND           | ND           | ND             | ND         | ND          | ND           | ND            | ND     | ND             |
| 6-6-1-2, I-5  | 0.1734       | 0.1519      | 0.2848       | ND           | 0.0612         | ND         | 0.1678      | ND           | ND            | 0.5599 | 0.3298         |
| 6-6-1-2, I-6  | 0.1301       | ND          | ND           | 0.2499       | 0.0540         | 0.1771     | 0.2477      | ND           | ND            | 0.4759 | 0.1618         |
| 6-6-1-2, I-7  | 0.0523       | ND          | ND           | 0.1523       | ND             | 0.2038     | 0.1327      | ND           | ND            | ND     | ND             |
| 6-6-1-2, I-8  | ND           | 0.0128      | 0.0561       | 0.1283       | 0.0098         | ND         | 0.0401      | 0.0642       | 0.0745        | ND     | ND             |
| 6-6-1-3, I-1  | 0.1121       | ND          | 0.0636       | ND           | 0.0152         | ND         | ND          | 0.3516       | ND            | ND     | 0.0338         |



**Supplementary Table S3. Continued...**

| Glycan       | H12<br>Alpha | H15<br>Beta | H14<br>Gamma | H23<br>Delta | H17<br>Epsilon | H29<br>Eta | H28<br>Iota | H1B<br>Kappa | H32<br>Lambda | H38 Mu | H41<br>Omicron |
|--------------|--------------|-------------|--------------|--------------|----------------|------------|-------------|--------------|---------------|--------|----------------|
| 6-6-1-3, I-2 | ND           | ND          | ND           | ND           | 0.0164         | ND         | ND          | ND           | ND            | ND     | 0.0745         |
| 6-6-1-3, I-3 | ND           | ND          | 0.1348       | 0.2077       | 0.0085         | 0.1064     | 0.1118      | ND           | ND            | 0.6201 | 0.2457         |
| 6-6-1-3, I-4 | ND           | ND          | ND           | ND           | 0.0204         | ND         | ND          | ND           | ND            | ND     | ND             |
| 6-6-1-3, I-5 | ND           | ND          | 0.1882       | 0.2415       | 0.0206         | ND         | 0.1035      | ND           | ND            | ND     | 0.0083         |
| 6-7-1-0, I-1 | ND           | ND          | ND           | ND           | ND             | ND         | ND          | ND           | ND            | ND     | 0.5881         |
| 6-7-1-0, I-2 | 1.5964       | 0.8146      | 0.5272       | 0.2439       | 1.1811         | ND         | 0.5737      | 0.2724       | ND            | 0.6870 | ND             |
| 6-7-1-0, I-3 | 0.3022       | ND          | ND           | ND           | ND             | 0.7097     | ND          | ND           | ND            | ND     | 0.0420         |
| 6-7-1-0, I-4 | 0.1402       | 0.0107      | ND           | 0.0330       | 0.0373         | ND         | 0.0293      | 0.0343       | ND            | ND     | ND             |
| 6-7-1-1, I-1 | ND           | 0.0226      | ND           | ND           | 0.0254         | 0.2253     | ND          | ND           | ND            | ND     | 0.2008         |
| 6-7-1-1, I-2 | 0.2035       | 0.3528      | 0.0741       | ND           | 0.0562         | 0.2497     | ND          | 0.0634       | ND            | ND     | 0.5302         |
| 6-7-1-1, I-3 | ND           | ND          | 0.1969       | ND           | 1.0280         | ND         | ND          | ND           | 0.3030        | 1.0091 | 0.3914         |
| 6-7-1-1, I-4 | 0.5426       | 0.8343      | 0.4277       | 0.1111       | ND             | ND         | 0.2100      | 0.1456       | 0.5423        | 0.7233 | ND             |
| 6-7-1-1, I-5 | 0.4293       | 0.5121      | 0.2949       | 0.2216       | 0.4655         | 0.1482     | 0.4062      | 0.1609       | 0.3201        | 0.3421 | 0.0690         |
| 6-7-1-1, I-6 | 0.2413       | 0.0159      | 0.1006       | 0.1570       | 0.0170         | 0.3954     | 0.2696      | 0.0958       | 0.1551        | ND     | 0.0157         |
| 6-7-1-1, I-7 | ND           | ND          | ND           | ND           | ND             | 0.2989     | ND          | ND           | ND            | ND     | ND             |
| 6-7-1-1, I-8 | 0.0826       | ND          | ND           | 0.1075       | ND             | 0.1285     | 0.0812      | 0.0571       | 0.1524        | ND     | 0.0259         |
| 6-7-1-2, I-1 | ND           | ND          | ND           | ND           | ND             | ND         | ND          | ND           | 0.6570        | ND     | 0.6654         |
| 6-7-1-2, I-2 | 0.1663       | 0.2118      | 0.5305       | ND           | 0.0466         | ND         | ND          | 0.3700       | ND            | 1.4572 | 1.4357         |
| 6-7-1-2, I-3 | 0.0940       | ND          | ND           | ND           | ND             | ND         | ND          | ND           | 3.6048        | ND     | ND             |
| 6-7-1-2, I-4 | 0.5540       | 0.6354      | 1.0178       | 0.3987       | 0.0542         | 0.2870     | 0.4819      | 0.4342       | ND            | ND     | 0.0814         |
| 6-7-1-2, I-5 | 0.0784       | ND          | ND           | 0.6257       | 0.7098         | 0.5880     | 0.6895      | ND           | ND            | ND     | 0.0469         |
| 6-7-1-2, I-6 | 0.0942       | ND          | ND           | 0.0891       | ND             | ND         | ND          | 0.0559       | ND            | ND     | 0.0149         |
| 6-7-1-2, I-7 | ND           | ND          | ND           | 0.0987       | ND             | 0.1511     | ND          | 0.0322       | ND            | ND     | ND             |
| 6-7-1-3, I-1 | 0.0752       | ND          | ND           | 0.4872       | ND             | ND         | ND          | 0.3438       | ND            | 0.3648 | 0.1869         |
| 6-7-1-3, I-2 | 0.0469       | 0.0747      | 0.4996       | 0.6577       | 0.0285         | ND         | 0.4289      | ND           | ND            | ND     | 0.6781         |
| 6-7-1-3, I-3 | ND           | ND          | ND           | ND           | ND             | ND         | ND          | ND           | ND            | ND     | 0.1562         |
| 6-7-1-3, I-4 | 0.1989       | ND          | 0.8798       | 0.1173       | 0.0358         | 0.2276     | 0.4961      | 0.3686       | 0.4604        | 0.5231 | 0.0138         |
| 6-7-1-3, I-5 | ND           | ND          | ND           | ND           | ND             | 0.2068     | ND          | ND           | 0.6136        | ND     | 0.0321         |
| 6-7-1-3, I-6 | 0.0323       | 0.2523      | 0.0215       | 0.0680       | 0.2576         | ND         | 0.0406      | 0.0418       | ND            | ND     | 0.0438         |
| 6-7-1-3, I-7 | 0.0236       | 0.0092      | 0.0466       | 0.0947       | 0.0085         | ND         | 0.0261      | 0.0454       | ND            | ND     | 0.0298         |
| 6-7-1-3, I-8 | 0.0286       | 0.0085      | 0.0396       | 0.0854       | 0.0066         | ND         | 0.0252      | 0.0297       | 0.0396        | ND     | 0.0054         |
| 6-7-1-3, I-9 | ND           | ND          | ND           | ND           | ND             | ND         | ND          | ND           | 0.0343        | ND     | ND             |
| 6-7-1-4, I-1 | ND           | ND          | ND           | ND           | ND             | ND         | ND          | ND           | ND            | ND     | 0.4361         |
| 6-7-1-4, I-2 | 0.0261       | 0.1939      | 0.2119       | 0.3924       | 0.0656         | ND         | 0.2607      | 0.2226       | 0.2848        | 0.1423 | ND             |
| 6-7-1-4, I-3 | ND           | ND          | ND           | ND           | ND             | ND         | ND          | ND           | ND            | ND     | 1.0811         |
| 6-7-1-4, I-4 | ND           | ND          | ND           | ND           | ND             | ND         | ND          | ND           | ND            | ND     | 0.4733         |
| 6-7-1-4, I-5 | ND           | ND          | ND           | ND           | ND             | ND         | ND          | ND           | ND            | ND     | 0.1095         |
| 6-7-1-4, I-6 | 0.0707       | 0.8107      | 0.5164       | 0.8194       | 0.6806         | ND         | 0.4734      | 0.3121       | 0.4637        | 0.3506 | 0.0145         |
| 6-7-1-4, I-7 | ND           | ND          | ND           | ND           | ND             | 0.1415     | ND          | ND           | ND            | ND     | 0.1639         |
| 6-7-1-4, I-8 | 0.0134       | 0.0087      | 0.0431       | 0.1350       | 0.0088         | ND         | 0.0381      | 0.0618       | 0.0415        | ND     | 0.0353         |
| 6-7-2-2, I-1 | ND           | ND          | ND           | ND           | ND             | ND         | ND          | ND           | ND            | ND     | 0.0356         |
| 6-7-2-2, I-2 | ND           | 0.6356      | ND           | ND           | 0.0146         | ND         | ND          | ND           | ND            | ND     | 0.2813         |
| 6-7-2-2, I-3 | ND           | ND          | ND           | ND           | ND             | ND         | ND          | ND           | 2.0110        | 0.9854 | 0.0342         |
| 6-7-2-2, I-4 | 0.1681       | 0.0335      | 0.4126       | 0.5891       | 0.0545         | ND         | 0.3014      | 0.4885       | ND            | ND     | 0.0013         |
| 6-7-2-2, I-5 | ND           | ND          | ND           | ND           | ND             | ND         | ND          | ND           | ND            | ND     | 0.0288         |
| 6-7-2-2, I-6 | ND           | ND          | ND           | ND           | ND             | 0.2420     | ND          | ND           | ND            | ND     | 0.0690         |
| 6-7-2-2, I-7 | ND           | ND          | ND           | ND           | ND             | ND         | ND          | ND           | ND            | ND     | 0.1553         |
| 6-7-2-2, I-8 | ND           | ND          | ND           | ND           | ND             | ND         | ND          | ND           | ND            | ND     | 0.0357         |
| 6-7-2-3, I-1 | 0.0243       | 0.0152      | 0.1098       | 0.2801       | 0.0109         | ND         | 0.0950      | 0.1708       | ND            | 0.1102 | 0.1943         |
| 6-7-2-3, I-2 | 0.0124       | 0.0327      | 0.0667       | 0.1796       | 0.0194         | ND         | 0.0480      | 0.0864       | ND            | 0.0527 | ND             |
| 6-7-2-3, I-3 | ND           | ND          | ND           | ND           | ND             | 0.0484     | ND          | ND           | 0.1242        | ND     | ND             |
| 6-7-2-3, I-4 | ND           | ND          | ND           | ND           | ND             | ND         | ND          | ND           | 0.0698        | ND     | ND             |
| 6-7-2-3, I-5 | ND           | 0.0007      | ND           | 0.0362       | ND             | ND         | ND          | 0.0209       | ND            | ND     | 0.0524         |
| 6-8-1-1, I-1 | 0.4030       | ND          | 0.1635       | 0.0697       | ND             | ND         | 0.4455      | 0.4175       | ND            | ND     | ND             |
| 6-8-1-1, I-2 | ND           | ND          | 0.2040       | ND           | ND             | ND         | 0.1656      | ND           | ND            | ND     | ND             |
| 6-8-1-1, I-3 | 8.4384       | ND          | 7.1350       | 1.2055       | ND             | ND         | 3.5171      | ND           | 7.9258        | ND     | ND             |
| 6-8-1-1, I-4 | ND           | ND          | 0.1367       | 1.0895       | ND             | ND         | 0.9458      | ND           | ND            | ND     | ND             |
| 6-8-1-1, I-5 | 2.4061       | ND          | 1.6177       | ND           | ND             | ND         | ND          | ND           | 2.9881        | ND     | ND             |
| 7-7-2-1, I-1 | ND           | ND          | ND           | ND           | ND             | ND         | ND          | ND           | ND            | ND     | 0.0143         |
| 7-7-2-1, I-2 | 0.0405       | 0.0110      | ND           | ND           | 0.0068         | ND         | ND          | 0.0198       | ND            | 0.0691 | 0.0166         |
| 7-7-2-1, I-3 | 0.0422       | 0.0200      | ND           | ND           | 0.0261         | ND         | ND          | 0.0250       | ND            | ND     | 0.0036         |
| 7-7-2-1, I-4 | 0.1144       | ND          | 0.1551       | ND           | ND             | ND         | ND          | ND           | ND            | ND     | ND             |

**Supplementary Table S3. Continued...**

| Glycan        | H12<br>Alpha | H15<br>Beta | H14<br>Gamma | H23<br>Delta | H17<br>Epsilon | H29<br>Eta | H28<br>Iota | H1B<br>Kappa | H32<br>Lambda | H38 Mu | H41<br>Omicron |
|---------------|--------------|-------------|--------------|--------------|----------------|------------|-------------|--------------|---------------|--------|----------------|
| 7-7-2-1, I-5  | 0.0951       | ND          | ND           | ND           | ND             | ND         | ND          | ND           | ND            | ND     | ND             |
| 7-7-2-1, I-6  | ND           | ND          | 0.0743       | ND           | ND             | ND         | ND          | ND           | 0.1354        | ND     | 0.0306         |
| 7-7-2-1, I-7  | 0.0998       | ND          | 0.0766       | ND           | 0.0131         | ND         | ND          | ND           | ND            | ND     | 0.0109         |
| 7-7-2-1, I-8  | 0.0494       | 0.0154      | 0.0721       | ND           | ND             | ND         | ND          | 0.0359       | ND            | ND     | 0.0283         |
| 7-7-2-1, I-9  | ND           | ND          | ND           | 0.0431       | ND             | ND         | 0.0297      | 0.0272       | ND            | ND     | 0.0346         |
| 7-7-2-1, I-10 | ND           | 0.0152      | ND           | 0.0455       | 0.0109         | ND         | 0.0177      | 0.0435       | ND            | ND     | ND             |
| 7-7-2-1, I-11 | 0.0288       | 0.0170      | ND           | 0.0537       | 0.0089         | ND         | 0.0229      | 0.0465       | ND            | ND     | 0.0030         |
| 7-7-2-1, I-12 | ND           | ND          | ND           | 0.0081       | ND             | ND         | ND          | 0.0081       | ND            | ND     | 0.0122         |
| 7-8-1-3       | 0.0101       | 0.0070      | ND           | 0.0443       | ND             | ND         | 0.0210      | 0.0441       | 0.0363        | ND     | 0.0074         |
| 7-8-1-4, I-1  | ND           | 0.0024      | ND           | ND           | ND             | ND         | ND          | 0.0048       | ND            | 0.0112 | 0.0173         |
| 7-8-1-4, I-2  | ND           | 0.0050      | ND           | 0.0050       | ND             | ND         | 0.0018      | 0.0104       | 0.0115        | ND     | 0.0405         |
| 7-8-1-4, I-3  | ND           | 0.0033      | ND           | 0.0148       | ND             | ND         | 0.0054      | 0.0055       | ND            | ND     | 0.0365         |
| 7-8-1-4, I-4  | ND           | ND          | ND           | 0.0091       | ND             | ND         | 0.0024      | 0.0008       | ND            | ND     | 0.0040         |
| 7-8-1-4, I-5  | ND           | ND          | ND           | 0.0018       | ND             | ND         | ND          | 0.0010       | ND            | ND     | 0.0071         |
| 7-8-2-2, I-1  | ND           | ND          | ND           | ND           | ND             | ND         | ND          | ND           | ND            | ND     | 0.0129         |
| 7-8-2-2, I-2  | ND           | ND          | ND           | ND           | ND             | ND         | ND          | ND           | ND            | ND     | ND             |
| 7-8-2-2, I-3  | ND           | ND          | ND           | ND           | ND             | ND         | ND          | ND           | ND            | ND     | 0.0025         |
| 7-8-2-2, I-4  | ND           | ND          | ND           | ND           | ND             | ND         | ND          | ND           | ND            | ND     | 0.0062         |
| 7-8-2-2, I-5  | ND           | 0.0066      | ND           | ND           | 0.0028         | ND         | ND          | 0.0243       | ND            | ND     | 0.0024         |
| 7-8-2-2, I-6  | ND           | 0.0058      | ND           | 0.0185       | 0.0031         | ND         | 0.0383      | 0.0152       | ND            | ND     | ND             |
| 7-8-2-4, I-1  | 1.0973       | 1.2243      | 1.6236       | 0.6288       | 0.5510         | ND         | 1.4823      | 0.3135       | ND            | 2.0567 | ND             |
| 7-8-2-4, I-2  | 0.5535       | ND          | 2.4515       | 0.4426       | ND             | 1.9773     | 1.6397      | 0.1778       | ND            | ND     | ND             |
| 7-8-2-4, I-3  | 0.4181       | ND          | 0.3469       | ND           | ND             | ND         | ND          | 0.1077       | ND            | ND     | ND             |
| 7-8-2-4, I-4  | 0.3360       | ND          | 0.3342       | 0.5984       | ND             | 0.8251     | 0.5770      | 0.0871       | ND            | ND     | ND             |
| 7-8-2-4, I-5  | ND           | ND          | 0.6989       | 0.4244       | ND             | ND         | 0.5685      | ND           | ND            | ND     | ND             |
| 7-8-2-4, I-6  | 0.2020       | ND          | 0.4768       | 0.1211       | ND             | 0.4335     | ND          | 0.0337       | ND            | ND     | ND             |
| 7-8-2-4, I-7  | 0.0618       | ND          | ND           | 0.0478       | ND             | ND         | 0.1955      | 0.0481       | ND            | ND     | ND             |
| 7-8-2-4, I-8  | 0.0641       | ND          | 0.1066       | 0.0838       | ND             | ND         | 0.0677      | 0.0146       | ND            | ND     | ND             |
| 8-8-0-2, I-1  | ND           | ND          | ND           | ND           | ND             | ND         | ND          | ND           | 0.1368        | ND     | ND             |
| 8-8-0-2, I-2  | 0.1373       | ND          | 0.8544       | 0.3014       | ND             | 0.0058     | ND          | 0.0462       | ND            | ND     | 0.0013         |
| 8-8-0-2, I-3  | 0.0873       | ND          | 0.5846       | 0.1875       | ND             | ND         | 0.2541      | 0.0270       | ND            | ND     | 0.0006         |
| 8-8-0-2, I-4  | 0.0429       | ND          | 0.2323       | 0.2391       | ND             | ND         | 0.1573      | 0.0154       | ND            | ND     | 0.0004         |
| 8-8-0-2, I-5  | 0.0343       | ND          | 0.1677       | 0.1597       | 0.0361         | ND         | 0.0783      | 0.0102       | ND            | ND     | 0.0004         |
| 8-8-0-2, I-6  | 0.0176       | ND          | 0.0519       | 0.0286       | ND             | 0.0941     | 0.0458      | 0.0041       | ND            | ND     | 0.0001         |
| 8-9-1-4       | ND           | ND          | ND           | 0.0112       | ND             | ND         | ND          | 0.0080       | ND            | ND     | 0.0037         |
| 10-10-1-1     | ND           | ND          | ND           | 0.0032       | ND             | ND         | ND          | 0.0007       | ND            | ND     | ND             |
| 4-13-0-0, I-1 | ND           | ND          | 0.1546       | ND           | 0.0552         | ND         | ND          | 0.0216       | ND            | 0.1000 | ND             |
| 4-13-0-0, I-2 | 0.1161       | 0.2853      | 0.3528       | 0.0457       | 0.1127         | ND         | 0.2990      | ND           | ND            | 0.2120 | ND             |
| 4-13-0-0, I-3 | ND           | ND          | ND           | ND           | ND             | 0.2241     | ND          | ND           | ND            | 0.1154 | ND             |
| 4-13-0-0, I-4 | ND           | ND          | ND           | ND           | 0.0174         | ND         | ND          | ND           | ND            | 0.0659 | ND             |
| 4-13-0-0, I-5 | 0.0760       | 0.0327      | 0.0898       | 0.0400       | 0.0138         | ND         | 0.0762      | 0.0156       | ND            | ND     | ND             |
| 4-16-0-0, I-1 | 0.0166       | ND          | 0.0338       | ND           | ND             | ND         | ND          | ND           | ND            | ND     | ND             |
| 4-16-0-0, I-2 | ND           | ND          | ND           | ND           | ND             | ND         | ND          | ND           | 0.0569        | 0.0243 | ND             |
| 4-16-0-0, I-3 | 0.0407       | ND          | ND           | 0.0295       | ND             | ND         | 0.0192      | 0.0379       | ND            | 0.0171 | ND             |
| 4-17-0-0, I-1 | ND           | ND          | ND           | ND           | ND             | ND         | ND          | 0.1013       | ND            | ND     | 0.2782         |
| 4-17-0-0, I-2 | ND           | ND          | ND           | 0.1828       | ND             | ND         | 0.6534      | 0.1578       | ND            | ND     | 0.6027         |
| 4-17-0-0, I-3 | ND           | ND          | ND           | ND           | ND             | ND         | ND          | ND           | ND            | ND     | 0.1626         |
| 5-7-2-1, I-1  | ND           | ND          | ND           | ND           | ND             | 0.2042     | ND          | ND           | ND            | ND     | ND             |
| 5-7-2-1, I-2  | 0.1023       | ND          | ND           | 0.0942       | ND             | ND         | 0.0797      | ND           | ND            | ND     | 0.1397         |
| 5-7-2-1, I-3  | 0.0873       | 0.0339      | 0.1171       | 0.0356       | ND             | ND         | 0.0596      | 0.0599       | ND            | ND     | 0.1986         |
| 5-7-2-1, I-4  | 0.0676       | 0.0453      | 0.0884       | 0.0377       | ND             | ND         | 0.0503      | 0.0518       | ND            | ND     | 0.1575         |
| 5-7-2-1, I-5  | ND           | 0.0221      | 0.0701       | 0.0495       | ND             | ND         | 0.0310      | 0.0759       | ND            | ND     | 0.3064         |
| 5-7-2-1, I-6  | ND           | 0.0293      | 0.1260       | 0.0960       | ND             | ND         | 0.0532      | 0.1028       | ND            | ND     | ND             |
| 5-7-2-1, I-7  | 0.0915       | 0.0525      | 0.1439       | 0.1284       | 0.0664         | ND         | 0.0695      | 0.0764       | ND            | ND     | 0.0176         |
| 5-8-3-1, I-1  | ND           | ND          | ND           | ND           | ND             | ND         | ND          | 0.0074       | ND            | ND     | 0.0258         |
| 5-8-3-1, I-2  | ND           | ND          | ND           | 0.0091       | ND             | ND         | ND          | 0.0083       | ND            | ND     | ND             |
| 5-8-3-1, I-3  | ND           | ND          | ND           | 0.0128       | ND             | ND         | 0.0064      | 0.0158       | ND            | ND     | 0.0447         |
| 5-8-3-1, I-4  | ND           | ND          | ND           | 0.0211       | ND             | ND         | 0.0067      | 0.0116       | ND            | ND     | ND             |
| 6-3-2-0, I-1  | 0.1115       | 2.6473      | 0.2594       | 0.4963       | 0.5678         | ND         | 1.6565      | 1.7754       | 0.5857        | 0.7730 | 0.8007         |
| 6-3-2-0, I-2  | ND           | ND          | ND           | ND           | ND             | 0.6749     | ND          | ND           | ND            | ND     | ND             |
| 6-3-2-0, I-3  | 0.0359       | ND          | ND           | ND           | 0.1121         | 0.1174     | 0.0773      | 0.1806       | ND            | ND     | ND             |
| 6-3-2-0, I-4  | 0.0548       | 0.0383      | ND           | 0.0479       | 0.0550         | ND         | 0.1129      | 0.0906       | 0.0682        | ND     | ND             |

**Supplementary Table S3. Continued...**

| Glycan       | H12<br>Alpha | H15<br>Beta | H14<br>Gamma | H23<br>Delta | H17<br>Epsilon | H29<br>Eta | H28<br>Iota | H1B<br>Kappa | H32<br>Lambda | H38 Mu | H41<br>Omicron |
|--------------|--------------|-------------|--------------|--------------|----------------|------------|-------------|--------------|---------------|--------|----------------|
| 6-3-2-0, I-5 | 0.0117       | ND          | ND           | ND           | 0.1321         | 0.0960     | 0.0795      | 0.0294       | ND            | ND     | ND             |
| 6-5-1-1, I-1 | 0.1360       | 0.0783      | 0.0689       | ND           | 0.0128         | 0.0751     | ND          | 0.0701       | 0.0549        | ND     | ND             |
| 6-5-1-1, I-2 | 0.1184       | 0.0605      | 0.0669       | ND           | 0.1113         | ND         | 0.1174      | 0.1489       | 0.0471        | ND     | ND             |
| 6-5-1-1, I-3 | 0.0944       | 0.0456      | 0.1655       | ND           | 0.0303         | ND         | 0.3784      | 0.1096       | ND            | 0.5359 | ND             |
| 6-5-1-1, I-4 | ND           | 0.2478      | ND           | ND           | 0.1385         | ND         | ND          | ND           | 0.0098        | ND     | ND             |
| 6-5-1-1, I-5 | 0.0458       | 0.0273      | 0.1828       | ND           | ND             | 0.3009     | 0.0748      | 0.0308       | ND            | ND     | ND             |
| 6-5-1-1, I-6 | 0.0793       | 0.0180      | ND           | ND           | 0.0542         | ND         | 0.0579      | 0.0398       | ND            | ND     | ND             |
| 6-5-1-1, I-7 | 0.1567       | 0.1128      | 0.1258       | 0.1568       | 0.0710         | 0.1204     | 0.1931      | 0.2080       | ND            | ND     | ND             |
| 6-5-1-1, I-8 | 0.0865       | 0.0542      | 0.0953       | 0.2731       | 0.0448         | ND         | 0.1077      | 0.1953       | ND            | ND     | ND             |
| 6-6-0-1, I-1 | ND           | ND          | ND           | ND           | ND             | ND         | ND          | ND           | ND            | ND     | 0.0141         |
| 6-6-0-1, I-2 | ND           | ND          | 0.2385       | ND           | ND             | ND         | ND          | 0.0071       | ND            | ND     | 0.0184         |
| 6-6-0-1, I-3 | 0.0396       | ND          | 0.0417       | 0.1007       | ND             | ND         | 0.0520      | 0.0058       | 0.1756        | ND     | ND             |
| 6-6-0-1, I-4 | ND           | ND          | ND           | 0.0806       | ND             | ND         | ND          | ND           | ND            | ND     | ND             |
| 6-6-1-0, I-1 | ND           | ND          | ND           | ND           | ND             | 0.0528     | ND          | ND           | ND            | ND     | ND             |
| 6-6-1-0, I-2 | ND           | ND          | ND           | ND           | ND             | ND         | ND          | ND           | ND            | ND     | 0.0849         |
| 6-6-1-0, I-3 | ND           | ND          | ND           | ND           | ND             | ND         | ND          | ND           | ND            | ND     | 0.2249         |
| 6-6-1-0, I-4 | 0.2774       | ND          | 0.1741       | ND           | ND             | 0.3345     | ND          | 0.1426       | ND            | 0.2808 | ND             |
| 6-6-1-0, I-5 | 0.0259       | ND          | 0.0467       | 0.0708       | ND             | ND         | 0.3036      | 0.0295       | 0.2440        | ND     | 0.4862         |
| 6-6-1-0, I-6 | 0.4194       | ND          | 0.3353       | 0.4229       | ND             | 0.0425     | 0.2178      | 0.2948       | ND            | 0.4712 | ND             |
| 6-6-1-0, I-7 | ND           | ND          | ND           | ND           | ND             | 0.3380     | ND          | ND           | ND            | ND     | ND             |
| 6-6-1-0, I-8 | 0.0237       | ND          | 0.0294       | 0.0211       | ND             | ND         | ND          | ND           | ND            | ND     | ND             |
| 6-6-1-0, I-9 | ND           | ND          | ND           | 0.2336       | ND             | ND         | 0.0267      | ND           | ND            | ND     | ND             |
| 6-6-1-1, I-1 | ND           | ND          | ND           | ND           | ND             | ND         | ND          | ND           | ND            | ND     | 0.1280         |
| 6-6-1-1, I-2 | 0.1531       | ND          | ND           | 0.0606       | ND             | ND         | 0.2823      | 0.1337       | 0.3596        | ND     | 0.3108         |
| 6-6-1-1, I-3 | ND           | ND          | ND           | ND           | ND             | ND         | ND          | ND           | 0.3248        | 1.6286 | 0.7408         |
| 6-6-1-1, I-4 | 0.4611       | 0.0596      | 0.3195       | 0.1704       | 0.0541         | ND         | 0.2680      | ND           | ND            | ND     | ND             |
| 6-6-1-1, I-5 | 0.2479       | 0.7624      | 0.3148       | 0.2412       | 0.2681         | 0.2072     | 0.4026      | 0.2764       | 0.4132        | ND     | ND             |
| 6-6-1-1, I-6 | ND           | ND          | ND           | ND           | ND             | ND         | ND          | ND           | ND            | 0.3597 | 0.1194         |
| 6-6-1-1, I-7 | 0.1749       | 0.0197      | 0.1000       | 0.1707       | 0.0128         | 0.4361     | 0.0682      | 0.1128       | 0.1706        | 0.2037 | 0.3637         |
| 6-6-1-1, I-8 | 0.0633       | 0.0999      | 0.1224       | 0.1879       | 0.0531         | ND         | 0.0717      | 0.1245       | ND            | ND     | ND             |
| 6-6-1-1, I-9 | ND           | ND          | ND           | ND           | ND             | 0.0835     | ND          | ND           | ND            | ND     | 0.0378         |
| 7-4-1-0, I-1 | ND           | 0.0052      | ND           | ND           | ND             | ND         | ND          | ND           | ND            | ND     | ND             |
| 7-4-1-0, I-2 | ND           | 0.3851      | 0.0127       | 0.0094       | 0.0213         | 0.0302     | 0.0491      | 0.0252       | ND            | ND     | ND             |
| 7-4-1-0, I-3 | ND           | 0.0133      | ND           | ND           | 0.0215         | ND         | 0.0253      | ND           | ND            | ND     | ND             |
| 7-4-1-0, I-4 | ND           | 0.0619      | ND           | ND           | 0.0445         | ND         | ND          | ND           | 0.0942        | 0.1060 | 0.0116         |
| 7-4-1-0, I-5 | ND           | 0.0313      | ND           | ND           | 0.0290         | ND         | ND          | ND           | ND            | ND     | ND             |
| 7-4-1-1, I-1 | ND           | 0.0210      | ND           | 0.0073       | ND             | ND         | 0.0283      | 0.0290       | ND            | ND     | ND             |
| 7-4-1-1, I-2 | ND           | ND          | ND           | 0.0075       | ND             | ND         | 0.0251      | 0.0260       | ND            | ND     | 0.0069         |
| 7-4-1-1, I-3 | ND           | 0.0100      | ND           | ND           | 0.0151         | ND         | ND          | ND           | ND            | ND     | ND             |
| 7-4-1-1, I-4 | ND           | 0.0117      | ND           | ND           | 0.0105         | ND         | ND          | ND           | ND            | ND     | 0.0080         |
| 7-4-1-1, I-5 | ND           | 0.0379      | ND           | ND           | 0.0305         | ND         | ND          | ND           | ND            | ND     | ND             |
| 7-4-1-1, I-6 | ND           | 0.0260      | ND           | ND           | 0.0170         | ND         | ND          | ND           | ND            | ND     | ND             |
| 7-5-0-0, I-1 | ND           | ND          | ND           | ND           | ND             | ND         | ND          | ND           | ND            | ND     | 0.0020         |
| 7-5-0-0, I-2 | ND           | ND          | ND           | ND           | ND             | ND         | ND          | ND           | ND            | ND     | 0.0081         |
| 7-5-0-0, I-3 | 0.0802       | ND          | 0.1687       | 0.0561       | ND             | ND         | ND          | 0.0333       | ND            | 0.4969 | ND             |
| 7-5-0-0, I-4 | 1.4415       | ND          | 5.7667       | 1.0512       | ND             | ND         | 0.1946      | 0.4382       | 4.8038        | ND     | ND             |
| 7-5-0-0, I-5 | 0.5743       | ND          | 1.7513       | 0.8883       | ND             | ND         | 3.3560      | 0.1626       | 1.9508        | ND     | ND             |
| 7-5-0-0, I-6 | 0.0378       | ND          | ND           | 0.0285       | ND             | ND         | 1.1502      | ND           | ND            | ND     | ND             |
| 7-5-1-0, I-1 | ND           | 0.0524      | 0.0220       | 0.0533       | 0.0173         | ND         | 0.0369      | 0.0470       | ND            | 0.0984 | 0.0479         |
| 7-5-1-0, I-2 | ND           | ND          | ND           | ND           | ND             | 0.0506     | ND          | ND           | ND            | ND     | ND             |
| 7-5-1-0, I-3 | ND           | ND          | 0.0227       | 0.0397       | ND             | 0.0960     | 0.0638      | ND           | ND            | ND     | ND             |
| 7-6-1-1, I-1 | ND           | ND          | ND           | ND           | ND             | 0.0748     | ND          | ND           | ND            | ND     | ND             |
| 7-6-1-1, I-2 | ND           | ND          | ND           | ND           | ND             | ND         | ND          | ND           | ND            | ND     | 0.0145         |
| 7-6-1-1, I-3 | ND           | 0.0170      | ND           | ND           | 0.0149         | ND         | ND          | 0.0122       | ND            | ND     | 0.0427         |
| 7-6-1-1, I-4 | 0.0100       | 0.0096      | 0.0276       | 0.0117       | 0.0138         | ND         | 0.0546      | 0.0245       | ND            | ND     | 0.0684         |
| 7-6-1-1, I-5 | 0.0512       | 0.0968      | 0.0559       | 0.0194       | 0.0720         | ND         | 0.0799      | 0.0464       | ND            | 0.0459 | ND             |
| 7-6-1-1, I-6 | ND           | ND          | ND           | ND           | ND             | ND         | ND          | ND           | 0.0643        | ND     | ND             |
| 7-6-1-1, I-7 | ND           | ND          | ND           | ND           | ND             | ND         | ND          | ND           | 0.0932        | ND     | ND             |
| 7-6-1-2, I-1 | 1.3307       | 0.7057      | 0.9784       | 0.1045       | 0.6289         | ND         | 0.3377      | 0.0858       | 0.5432        | ND     | ND             |
| 7-6-1-2, I-2 | 2.2109       | 1.1687      | 1.4876       | 0.2042       | 1.6499         | 0.6765     | 0.4713      | 0.1008       | 0.9977        | ND     | ND             |
| 7-6-1-2, I-3 | ND           | ND          | ND           | ND           | ND             | 0.8449     | ND          | ND           | ND            | ND     | ND             |
| 7-6-1-2, I-4 | 1.2138       | ND          | ND           | ND           | ND             | ND         | ND          | ND           | ND            | ND     | ND             |

**Supplementary Table S3. Continued...**

| Glycan       | H12<br>Alpha | H15<br>Beta | H14<br>Gamma | H23<br>Delta | H17<br>Epsilon | H29<br>Eta | H28<br>Iota | H1B<br>Kappa | H32<br>Lambda | H38 Mu | H41<br>Omicron |
|--------------|--------------|-------------|--------------|--------------|----------------|------------|-------------|--------------|---------------|--------|----------------|
| 7-6-1-2, I-5 | 0.3191       | ND          | ND           | ND           | ND             | ND         | ND          | ND           | ND            | ND     | ND             |
| 7-6-1-2, I-6 | 1.5496       | ND          | ND           | ND           | ND             | ND         | ND          | ND           | ND            | ND     | ND             |
| 7-6-1-2, I-7 | 0.1109       | ND          | ND           | ND           | ND             | ND         | ND          | ND           | ND            | ND     | ND             |
| 7-6-1-2, I-8 | 0.1996       | ND          | ND           | ND           | ND             | ND         | ND          | ND           | ND            | ND     | ND             |
| 7-6-1-3, I-1 | ND           | ND          | ND           | ND           | ND             | ND         | ND          | ND           | ND            | ND     | 0.0587         |
| 7-6-1-3, I-2 | ND           | 0.0509      | ND           | 0.0363       | 0.0086         | ND         | 0.0463      | 0.0522       | 0.2350        | ND     | 0.0178         |
| 7-6-1-3, I-3 | ND           | ND          | ND           | ND           | ND             | ND         | ND          | ND           | ND            | ND     | 0.0413         |
| 7-6-1-3, I-4 | ND           | 0.0884      | ND           | 0.0456       | 0.0138         | ND         | 0.0510      | 0.0441       | 0.4927        | 0.3820 | 0.0126         |
| 7-6-1-3, I-5 | ND           | 0.0350      | ND           | 0.0546       | 0.0311         | 0.0743     | 0.0639      | 0.0418       | ND            | ND     | 0.0089         |
| 7-7-0-1, I-1 | 0.0646       | ND          | 0.2186       | ND           | ND             | 0.0138     | ND          | 0.0143       | ND            | 0.1220 | ND             |
| 7-7-0-1, I-2 | 0.2011       | ND          | 0.6599       | 0.0796       | ND             | ND         | 0.0890      | 0.0321       | ND            | ND     | ND             |
| 7-7-0-1, I-3 | 0.0505       | ND          | 0.2002       | 0.2033       | ND             | ND         | 0.2101      | ND           | ND            | ND     | ND             |
| 7-7-0-1, I-4 | 0.2331       | ND          | 0.9095       | 0.4107       | ND             | ND         | 0.2187      | 0.0527       | ND            | ND     | ND             |
| 7-7-0-1, I-5 | 0.0691       | ND          | 0.1804       | 0.1699       | ND             | ND         | 0.0652      | ND           | ND            | ND     | ND             |
| 7-7-0-1, I-6 | 0.0583       | ND          | 0.1669       | 0.1264       | ND             | ND         | 0.0501      | 0.0242       | ND            | ND     | ND             |
| 7-7-0-1, I-7 | 0.0717       | ND          | 0.2234       | 0.2411       | ND             | ND         | 0.0532      | ND           | ND            | ND     | ND             |
| 7-7-1-0, I-1 | ND           | ND          | ND           | ND           | ND             | ND         | ND          | ND           | ND            | ND     | 0.2755         |
| 7-7-1-0, I-2 | 0.1862       | 0.6364      | 0.2334       | 0.1164       | 0.2575         | 0.1014     | 0.2097      | 0.1011       | 0.3750        | ND     | ND             |
| 7-7-1-0, I-3 | ND           | ND          | ND           | ND           | ND             | ND         | ND          | ND           | ND            | ND     | 0.0216         |
| 7-7-1-1, I-1 | 0.1411       | 0.6006      | 0.3452       | 0.1385       | 0.3513         | ND         | 0.1891      | 0.1475       | ND            | 0.3365 | ND             |
| 7-7-1-1, I-2 | ND           | 0.0666      | ND           | 0.0336       | 0.0888         | 0.2203     | 0.0531      | 0.0310       | ND            | ND     | ND             |
| 7-7-1-1, I-3 | ND           | ND          | ND           | ND           | ND             | ND         | ND          | ND           | ND            | ND     | 0.0036         |
| 7-7-1-1, I-4 | ND           | ND          | ND           | ND           | ND             | ND         | ND          | ND           | ND            | ND     | 0.0146         |
| 7-7-1-2, I-1 | ND           | ND          | ND           | ND           | ND             | ND         | ND          | ND           | ND            | ND     | 0.0360         |
| 7-7-1-2, I-2 | 0.0140       | 0.0334      | 0.0419       | 0.0541       | 0.0248         | ND         | 0.0421      | 0.0443       | ND            | ND     | 0.0548         |
| 7-7-1-2, I-3 | 0.0121       | 0.0295      | 0.0334       | 0.0645       | 0.0228         | 0.0492     | 0.0413      | 0.0627       | ND            | ND     | 0.1040         |
| 7-7-1-2, I-4 | 0.0153       | 0.1868      | 0.0678       | 0.0991       | 0.0814         | ND         | 0.0690      | 0.0726       | ND            | ND     | ND             |
| 7-7-1-3, I-1 | ND           | ND          | ND           | ND           | ND             | ND         | ND          | ND           | ND            | ND     | 0.0087         |
| 7-7-1-3, I-2 | ND           | ND          | ND           | ND           | ND             | ND         | ND          | ND           | ND            | ND     | 0.0607         |
| 7-7-1-3, I-3 | ND           | ND          | ND           | ND           | ND             | ND         | ND          | ND           | ND            | ND     | 0.0262         |
| 7-7-1-3, I-4 | 0.0031       | 0.0305      | 0.0247       | 0.0516       | 0.0110         | ND         | 0.0206      | 0.0390       | 0.0242        | 0.0513 | 0.0504         |
| 7-7-1-3, I-5 | 0.0040       | 0.0278      | 0.0249       | 0.0749       | 0.0063         | ND         | 0.0329      | 0.0482       | 0.0481        | 0.0475 | 0.0018         |
| 7-7-1-3, I-6 | ND           | ND          | ND           | ND           | ND             | ND         | ND          | ND           | ND            | ND     | 0.0121         |
| 7-8-1-1, I-1 | ND           | ND          | ND           | ND           | ND             | ND         | ND          | ND           | ND            | ND     | 0.0839         |
| 7-8-1-1, I-2 | 0.0188       | 0.0166      | 0.0698       | 0.0574       | 0.0378         | ND         | 0.1282      | 0.0775       | ND            | ND     | 1.1035         |
| 7-8-1-1, I-3 | 0.2064       | 0.5721      | 0.7821       | 0.9413       | 0.3828         | ND         | 0.7080      | 0.8701       | ND            | ND     | 2.4585         |
| 7-8-1-1, I-4 | 0.2940       | 0.9151      | 1.0163       | 1.4167       | 0.7377         | ND         | 0.7752      | 0.7104       | ND            | ND     | ND             |
| 7-8-1-1, I-5 | ND           | ND          | ND           | ND           | ND             | ND         | ND          | ND           | ND            | ND     | 0.0665         |
| 7-8-1-1, I-6 | 0.0196       | ND          | ND           | 0.0309       | ND             | ND         | ND          | 0.0351       | ND            | ND     | 0.1154         |
| 7-8-1-1, I-7 | 0.0332       | ND          | ND           | 0.0770       | ND             | ND         | ND          | 0.0413       | ND            | ND     | ND             |
| 7-8-1-2, I-1 | ND           | ND          | ND           | ND           | ND             | ND         | ND          | ND           | ND            | ND     | 0.0053         |
| 7-8-1-2, I-2 | ND           | ND          | ND           | ND           | ND             | ND         | ND          | ND           | ND            | ND     | 0.0073         |
| 7-8-1-2, I-3 | 0.0189       | 0.0043      | 0.0205       | 0.0201       | 0.0053         | ND         | 0.0168      | 0.0252       | ND            | 0.0492 | 0.0063         |
| 7-8-1-2, I-4 | ND           | ND          | ND           | ND           | ND             | ND         | ND          | ND           | ND            | ND     | 0.0010         |
| 8-6-1-0      | ND           | ND          | ND           | ND           | ND             | ND         | ND          | 0.1478       | ND            | ND     | ND             |
| 8-6-1-1, I-1 | ND           | ND          | ND           | ND           | ND             | ND         | ND          | ND           | ND            | ND     | 0.0091         |
| 8-6-1-1, I-2 | ND           | ND          | ND           | ND           | ND             | ND         | ND          | ND           | ND            | ND     | 0.0222         |
| 8-6-1-1, I-3 | ND           | 0.0240      | ND           | 0.0053       | ND             | ND         | 0.0093      | 0.0090       | ND            | ND     | 0.0044         |
| 8-8-0-0, I-1 | 0.0575       | ND          | 0.0846       | ND           | ND             | ND         | ND          | 0.0374       | ND            | ND     | ND             |
| 8-8-0-0, I-2 | 0.0566       | ND          | 0.1078       | ND           | ND             | ND         | ND          | ND           | ND            | ND     | ND             |
| 8-8-0-0, I-3 | 0.0166       | ND          | 0.0401       | ND           | ND             | ND         | ND          | ND           | ND            | ND     | ND             |
| 8-8-0-0, I-4 | 0.0172       | ND          | 0.0261       | ND           | ND             | ND         | ND          | 0.0261       | ND            | ND     | ND             |
| 8-8-0-0, I-5 | 0.0102       | ND          | 0.0170       | ND           | ND             | ND         | ND          | 0.0256       | ND            | ND     | ND             |
| 8-8-1-2, I-1 | 0.0057       | 0.0156      | ND           | ND           | ND             | ND         | ND          | 0.0150       | ND            | ND     | 0.0310         |
| 8-8-1-2, I-2 | 0.0768       | ND          | ND           | ND           | ND             | ND         | ND          | 0.0469       | ND            | ND     | 0.0586         |
| 8-8-1-2, I-3 | 0.2387       | ND          | ND           | ND           | ND             | ND         | ND          | 0.0428       | ND            | ND     | ND             |
| 8-8-1-2, I-4 | 0.0735       | ND          | ND           | ND           | ND             | 0.2159     | ND          | 0.0244       | ND            | ND     | ND             |
| 8-8-1-2, I-5 | 0.1305       | ND          | ND           | ND           | ND             | 0.5582     | ND          | 0.0224       | ND            | ND     | ND             |
| 8-8-1-2, I-6 | 0.0254       | ND          | ND           | ND           | ND             | 0.1138     | ND          | 0.0221       | ND            | ND     | ND             |
| 8-9-0-2, I-1 | 0.0934       | ND          | 0.1511       | ND           | ND             | ND         | ND          | 0.1199       | ND            | 0.3249 | 0.0997         |
| 8-9-0-2, I-2 | ND           | ND          | ND           | ND           | ND             | 0.2732     | ND          | ND           | ND            | ND     | ND             |
